# Supplementary material
Source: Research Square preprint supplement (doi:10.21203/rs.3.rs-10167707/v1)
Supplement: Supplementary file 1 [file e337467584424ff5b8e6921a.xlsx]

## Sheet: Index
Article Title	Crop phenological age and host-plant traits structure arthropod assemblages in Solanum melongena under a staggered cohort design (SCD)
Journal Name	Arthropod-Plant Interactions
Author Name(s)	Ajoy Kumar Mukhopadhyay¹, Soumya Sarathi Kundu², Bimal Mondal³ and Soumik Dey Roy⁴,⁵
Affiliation(s)	¹Department of Agricultural Entomology, Bidhan Chandra Krishi Viswavidyalaya, Mohanpur, Nadia-741252, West Bengal, India; ²Krishi Vigyan Kendra Burdwan, ICAR-Central Research Institute for Jute and Allied Fibers (ICAR-CRIJAF), Bud Bud, Purba Bardhaman-713403, West Bengal, India; ³Product Development, SML Limited, West Bengal, India; ⁴Department of Agriculture, School of Agriculture, Brainware Uni…
E-mail Address of the Corresponding Author	soumikdeyroy.ento@gmail.com
Supplementary table	Short title	Main manuscript purpose	Rows	Columns
Table S1	Full age-wise arthropod abundance under common weather	Documents the raw and transformed mean abundance values behind the age-cohort results.	297	13
Table S2	Full pairwise t-test contrasts under common weather	Documents all crop-pair contrasts used as design-based evidence for crop-age effects.	112	18
Table S3	Complete host-plant trait correlation matrix	Provides the full physico-morphic and biochemical correlation evidence.	1547	12
Table S4	Complete regression equations and R² values	Provides model equations and explained variance for physico-morphic and biochemical predictor blocks.	88	7
Table S5	Complete partial-correlation matrix after trait control	Documents residual arthropod associations after controlling physico-morphic or biochemical plant traits.	1037	13
Item	Note
Notation	ns = not significant; * P ≤ 0.05; ** P ≤ 0.01.
Transformation	Square-root transformed values follow the thesis convention √(x + 0.05), where available.
Observation units	Per three leaves, per cm² leaf area or per plant, depending on arthropod taxon. These units must not be pooled mechanically.

## Sheet: S1_Age_abundance
Table S1. Full age-wise abundance of focal arthropod taxa under common weather.
Means are presented with the original observation unit and square-root transformed value where available. This table supports the condensed age-cohort results in the main manuscript.
Crop	Age cohort	Average temperature (°C)	Average RH (%)	Rainfall (mm)	Arthropod taxon	Guild	Observation unit	Mean abundance	Square-root transformed value	DMRT group
1st crop	91-140 DAT	28.2	78.3	8.4	Ant	Ant guild	per three leaves	0.37	0.65	a
1st crop	91-140 DAT	28.2	78.3	8.4	BSFB	Chewing guild	per plant	1.55	1.27	c
1st crop	91-140 DAT	28.2	78.3	8.4	Epilachna beetle	Chewing guild	per three leaves	0.06	0.33	a
1st crop	91-140 DAT	28.2	78.3	8.4	Flea beetle	Chewing guild	per three leaves	0.26	0.56	b
1st crop	91-140 DAT	28.2	78.3	8.4	Lady bird beetle	Predatory guild	per three leaves	0.16	0.46	ab
1st crop	91-140 DAT	28.2	78.3	8.4	Spider	Predatory guild	per three leaves	0.16	0.46	a
1st crop	91-140 DAT	28.2	78.3	8.4	Aphid	Sucking guild	per sq cm leaf	8.31	2.89	b
1st crop	91-140 DAT	28.2	78.3	8.4	Jassid	Sucking guild	per three leaves	0.52	0.76	b
1st crop	91-140 DAT	28.2	78.3	8.4	Mealybug	Sucking guild	per three leaves	20.25	4.51	b
1st crop	91-140 DAT	28.2	78.3	8.4	Thrips	Sucking guild	per sq cm leaf	0	0.22	a
1st crop	91-140 DAT	28.2	78.3	8.4	Whitefly	Sucking guild	per three leaves	1.02	1.03	b
2nd crop	41-90 DAT	28.2	78.3	8.4	Ant	Ant guild	per three leaves	0.05	0.32	a
2nd crop	41-90 DAT	28.2	78.3	8.4	BSFB	Chewing guild	per plant	0.3	0.59	b
2nd crop	41-90 DAT	28.2	78.3	8.4	Epilachna beetle	Chewing guild	per three leaves	1.32	1.17	b
2nd crop	41-90 DAT	28.2	78.3	8.4	Flea beetle	Chewing guild	per three leaves	0	0.22	a
2nd crop	41-90 DAT	28.2	78.3	8.4	Lady bird beetle	Predatory guild	per three leaves	0.22	0.52	b
2nd crop	41-90 DAT	28.2	78.3	8.4	Spider	Predatory guild	per three leaves	0.5	0.74	b
2nd crop	41-90 DAT	28.2	78.3	8.4	Aphid	Sucking guild	per sq cm leaf	0.14	0.44	a
2nd crop	41-90 DAT	28.2	78.3	8.4	Jassid	Sucking guild	per three leaves	0.76	0.9	b
2nd crop	41-90 DAT	28.2	78.3	8.4	Mealybug	Sucking guild	per three leaves	0.9	0.98	ab
2nd crop	41-90 DAT	28.2	78.3	8.4	Thrips	Sucking guild	per sq cm leaf	0	0.22	a
2nd crop	41-90 DAT	28.2	78.3	8.4	Whitefly	Sucking guild	per three leaves	3.83	1.97	c
2nd crop	91-140 DAT	20.1	74.6	1.4	Ant	Ant guild	per three leaves	0.2	0.5	a
2nd crop	91-140 DAT	20.1	74.6	1.4	BSFB	Chewing guild	per plant	0.1	0.39	ab
2nd crop	91-140 DAT	20.1	74.6	1.4	Epilachna beetle	Chewing guild	per three leaves	1.77	1.35	c
2nd crop	91-140 DAT	20.1	74.6	1.4	Flea beetle	Chewing guild	per three leaves	0	0.22	a
2nd crop	91-140 DAT	20.1	74.6	1.4	Lady bird beetle	Predatory guild	per three leaves	5.89	2.44	b
2nd crop	91-140 DAT	20.1	74.6	1.4	Spider	Predatory guild	per three leaves	0.2	0.71	a
2nd crop	91-140 DAT	20.1	74.6	1.4	Aphid	Sucking guild	per sq cm leaf	0.04	0.3	a
2nd crop	91-140 DAT	20.1	74.6	1.4	Jassid	Sucking guild	per three leaves	1.8	1.36	b
2nd crop	91-140 DAT	20.1	74.6	1.4	Mealybug	Sucking guild	per three leaves	4.37	2.1	b
2nd crop	91-140 DAT	20.1	74.6	1.4	Thrips	Sucking guild	per sq cm leaf	0	0.22	a
2nd crop	91-140 DAT	20.1	74.6	1.4	Whitefly	Sucking guild	per three leaves	9.21	3.04	b
3rd crop	1-40 DAT	28.2	78.3	8.4	Ant	Ant guild	per three leaves	0.53	0.76	a
3rd crop	1-40 DAT	28.2	78.3	8.4	BSFB	Chewing guild	per plant	0	0.22	a
3rd crop	1-40 DAT	28.2	78.3	8.4	Epilachna beetle	Chewing guild	per three leaves	0.04	0.3	a
3rd crop	1-40 DAT	28.2	78.3	8.4	Flea beetle	Chewing guild	per three leaves	0.17	0.47	ab
3rd crop	1-40 DAT	28.2	78.3	8.4	Lady bird beetle	Predatory guild	per three leaves	0.04	0.3	a
3rd crop	1-40 DAT	28.2	78.3	8.4	Spider	Predatory guild	per three leaves	0.13	0.42	a
3rd crop	1-40 DAT	28.2	78.3	8.4	Aphid	Sucking guild	per sq cm leaf	1.23	1.13	a
3rd crop	1-40 DAT	28.2	78.3	8.4	Jassid	Sucking guild	per three leaves	0.08	0.36	a
3rd crop	1-40 DAT	28.2	78.3	8.4	Mealybug	Sucking guild	per three leaves	0	0.22	a
3rd crop	1-40 DAT	28.2	78.3	8.4	Thrips	Sucking guild	per sq cm leaf	3.2	1.8	b
3rd crop	1-40 DAT	28.2	78.3	8.4	Whitefly	Sucking guild	per three leaves	0.3	0.65	a
3rd crop	41-90 DAT	20.1	74.6	1.4	Ant	Ant guild	per three leaves	0.3	0.59	a
3rd crop	41-90 DAT	20.1	74.6	1.4	BSFB	Chewing guild	per plant	0.52	0.76	b
3rd crop	41-90 DAT	20.1	74.6	1.4	Epilachna beetle	Chewing guild	per three leaves	0.68	0.85	b
3rd crop	41-90 DAT	20.1	74.6	1.4	Flea beetle	Chewing guild	per three leaves	0.18	0.48	a
3rd crop	41-90 DAT	20.1	74.6	1.4	Lady bird beetle	Predatory guild	per three leaves	0.02	0.27	a
3rd crop	41-90 DAT	20.1	74.6	1.4	Spider	Predatory guild	per three leaves	0.3	0.69	a
3rd crop	41-90 DAT	20.1	74.6	1.4	Aphid	Sucking guild	per sq cm leaf	4.25	2.07	b
3rd crop	41-90 DAT	20.1	74.6	1.4	Jassid	Sucking guild	per three leaves	2.48	1.59	b
3rd crop	41-90 DAT	20.1	74.6	1.4	Mealybug	Sucking guild	per three leaves	0	0.22	a
3rd crop	41-90 DAT	20.1	74.6	1.4	Thrips	Sucking guild	per sq cm leaf	7.67	2.78	b
3rd crop	41-90 DAT	20.1	74.6	1.4	Whitefly	Sucking guild	per three leaves	1.86	1.38	a
3rd crop	91-140 DAT	23.15	73.5	9.66	Ant	Ant guild	per three leaves	0	0.22	a
3rd crop	91-140 DAT	23.15	73.5	9.66	BSFB	Chewing guild	per plant	0.676	0.85	ab
3rd crop	91-140 DAT	23.15	73.5	9.66	Epilachna beetle	Chewing guild	per three leaves	0	0.22	a
3rd crop	91-140 DAT	23.15	73.5	9.66	Flea beetle	Chewing guild	per three leaves	0.23	0.53	a
3rd crop	91-140 DAT	23.15	73.5	9.66	Lady bird beetle	Predatory guild	per three leaves	0.24	0.54	a
3rd crop	91-140 DAT	23.15	73.5	9.66	Spider	Predatory guild	per three leaves	0.44	0.7	b
3rd crop	91-140 DAT	23.15	73.5	9.66	Aphid	Sucking guild	per sq cm leaf	44.68	6.7	b
3rd crop	91-140 DAT	23.15	73.5	9.66	Jassid	Sucking guild	per three leaves	0.74	0.89	b
3rd crop	91-140 DAT	23.15	73.5	9.66	Mealybug	Sucking guild	per three leaves	0	0.22	a
3rd crop	91-140 DAT	23.15	73.5	9.66	Thrips	Sucking guild	per sq cm leaf	16.07	4.01	b
3rd crop	91-140 DAT	23.15	73.5	9.66	Whitefly	Sucking guild	per three leaves	1.2	1.12	a
4th crop	1-40 DAT	20.1	74.6	1.4	Ant	Ant guild	per three leaves	0.28	0.57	a
4th crop	1-40 DAT	20.1	74.6	1.4	BSFB	Chewing guild	per plant	0	0.22	a
4th crop	1-40 DAT	20.1	74.6	1.4	Epilachna beetle	Chewing guild	per three leaves	0.04	0.3	a
4th crop	1-40 DAT	20.1	74.6	1.4	Flea beetle	Chewing guild	per three leaves	0.04	0.3	a
4th crop	1-40 DAT	20.1	74.6	1.4	Lady bird beetle	Predatory guild	per three leaves	0	0.22	a
4th crop	1-40 DAT	20.1	74.6	1.4	Spider	Predatory guild	per three leaves	0.28	0.52	a
4th crop	1-40 DAT	20.1	74.6	1.4	Aphid	Sucking guild	per sq cm leaf	1.66	1.31	ab
4th crop	1-40 DAT	20.1	74.6	1.4	Jassid	Sucking guild	per three leaves	0.43	0.69	a
4th crop	1-40 DAT	20.1	74.6	1.4	Mealybug	Sucking guild	per three leaves	0	0.22	a
4th crop	1-40 DAT	20.1	74.6	1.4	Thrips	Sucking guild	per sq cm leaf	0.726	0.88	a
4th crop	1-40 DAT	20.1	74.6	1.4	Whitefly	Sucking guild	per three leaves	2.74	1.67	a
4th crop	41-90 DAT	23.15	73.5	9.66	Ant	Ant guild	per three leaves	0	0.22	a
4th crop	41-90 DAT	23.15	73.5	9.66	BSFB	Chewing guild	per plant	2.02	1.44	b
4th crop	41-90 DAT	23.15	73.5	9.66	Epilachna beetle	Chewing guild	per three leaves	0.08	0.36	b
4th crop	41-90 DAT	23.15	73.5	9.66	Flea beetle	Chewing guild	per three leaves	0.16	0.46	a
4th crop	41-90 DAT	23.15	73.5	9.66	Lady bird beetle	Predatory guild	per three leaves	0.82	0.93	b
4th crop	41-90 DAT	23.15	73.5	9.66	Spider	Predatory guild	per three leaves	0.36	0.64	b
4th crop	41-90 DAT	23.15	73.5	9.66	Aphid	Sucking guild	per sq cm leaf	11.33	3.37	ab
4th crop	41-90 DAT	23.15	73.5	9.66	Jassid	Sucking guild	per three leaves	2.76	1.68	c
4th crop	41-90 DAT	23.15	73.5	9.66	Mealybug	Sucking guild	per three leaves	0	0.22	a
4th crop	41-90 DAT	23.15	73.5	9.66	Thrips	Sucking guild	per sq cm leaf	11.27	3.36	b
4th crop	41-90 DAT	23.15	73.5	9.66	Whitefly	Sucking guild	per three leaves	4.42	2.12	b
4th crop	91-140 DAT	32.84	67.5	3.56	Ant	Ant guild	per three leaves	0.13	0.42	a
4th crop	91-140 DAT	32.84	67.5	3.56	BSFB	Chewing guild	per plant	0.61	0.81	a
4th crop	91-140 DAT	32.84	67.5	3.56	Epilachna beetle	Chewing guild	per three leaves	3.15	1.79	a
4th crop	91-140 DAT	32.84	67.5	3.56	Flea beetle	Chewing guild	per three leaves	0.78	0.91	b
4th crop	91-140 DAT	32.84	67.5	3.56	Lady bird beetle	Predatory guild	per three leaves	0	0.22	a
4th crop	91-140 DAT	32.84	67.5	3.56	Spider	Predatory guild	per three leaves	0.08	0.36	a
4th crop	91-140 DAT	32.84	67.5	3.56	Aphid	Sucking guild	per sq cm leaf	0.47	0.72	b
4th crop	91-140 DAT	32.84	67.5	3.56	Jassid	Sucking guild	per three leaves	1.98	1.43	ab
4th crop	91-140 DAT	32.84	67.5	3.56	Mealybug	Sucking guild	per three leaves	0	0.22	a
4th crop	91-140 DAT	32.84	67.5	3.56	Thrips	Sucking guild	per sq cm leaf	2.69	1.65	ab
4th crop	91-140 DAT	32.84	67.5	3.56	Whitefly	Sucking guild	per three leaves	1.5	1.25	a
5th crop	1-40 DAT	23.15	73.5	9.66	Ant	Ant guild	per three leaves	0.22	0.52	b
5th crop	1-40 DAT	23.15	73.5	9.66	BSFB	Chewing guild	per plant	0	0.22	a
5th crop	1-40 DAT	23.15	73.5	9.66	Epilachna beetle	Chewing guild	per three leaves	0	0.22	a
5th crop	1-40 DAT	23.15	73.5	9.66	Flea beetle	Chewing guild	per three leaves	0.18	0.48	a
5th crop	1-40 DAT	23.15	73.5	9.66	Lady bird beetle	Predatory guild	per three leaves	0	0.22	a
5th crop	1-40 DAT	23.15	73.5	9.66	Spider	Predatory guild	per three leaves	0	0.22	a
5th crop	1-40 DAT	23.15	73.5	9.66	Aphid	Sucking guild	per sq cm leaf	0	0.22	a
5th crop	1-40 DAT	23.15	73.5	9.66	Jassid	Sucking guild	per three leaves	0.16	0.46	a
5th crop	1-40 DAT	23.15	73.5	9.66	Mealybug	Sucking guild	per three leaves	0	0.22	a
5th crop	1-40 DAT	23.15	73.5	9.66	Thrips	Sucking guild	per sq cm leaf	0	0.22	a
5th crop	1-40 DAT	23.15	73.5	9.66	Whitefly	Sucking guild	per three leaves	0.64	0.83	a
5th crop	41-90 DAT	32.84	67.5	3.56	Ant	Ant guild	per three leaves	0.49
5th crop	41-90 DAT	32.84	67.5	3.56	BSFB	Chewing guild	per plant	0.71	0.87	a
5th crop	41-90 DAT	32.84	67.5	3.56	Epilachna beetle	Chewing guild	per three leaves	3.08	1.77	a
5th crop	41-90 DAT	32.84	67.5	3.56	Flea beetle	Chewing guild	per three leaves	0.78	0.91	b
5th crop	41-90 DAT	32.84	67.5	3.56	Lady bird beetle	Predatory guild	per three leaves	0	0.22	a
5th crop	41-90 DAT	32.84	67.5	3.56	Spider	Predatory guild	per three leaves	0.16	0.46	a
5th crop	41-90 DAT	32.84	67.5	3.56	Aphid	Sucking guild	per sq cm leaf	0.17	0.47	ab
5th crop	41-90 DAT	32.84	67.5	3.56	Jassid	Sucking guild	per three leaves	5.05	2.26	b
5th crop	41-90 DAT	32.84	67.5	3.56	Mealybug	Sucking guild	per three leaves	0	0.22	a
5th crop	41-90 DAT	32.84	67.5	3.56	Thrips	Sucking guild	per sq cm leaf	1.2	2.58	b
5th crop	41-90 DAT	32.84	67.5	3.56	Whitefly	Sucking guild	per three leaves	1.41	1.21	a
6th crop	1-40 DAT	32.84	67.5	3.56	Ant	Ant guild	per three leaves	0.14	0.47	a
6th crop	1-40 DAT	32.84	67.5	3.56	BSFB	Chewing guild	per plant	0.02	0.27	a
6th crop	1-40 DAT	32.84	67.5	3.56	Epilachna beetle	Chewing guild	per three leaves	2.79	1.69	a
6th crop	1-40 DAT	32.84	67.5	3.56	Flea beetle	Chewing guild	per three leaves	0	0.22	a
6th crop	1-40 DAT	32.84	67.5	3.56	Lady bird beetle	Predatory guild	per three leaves	0	0.22	a
6th crop	1-40 DAT	32.84	67.5	3.56	Spider	Predatory guild	per three leaves	0.04	0.3	a
6th crop	1-40 DAT	32.84	67.5	3.56	Aphid	Sucking guild	per sq cm leaf	0	0.22	a
6th crop	1-40 DAT	32.84	67.5	3.56	Jassid	Sucking guild	per three leaves	0.56	0.78	a
6th crop	1-40 DAT	32.84	67.5	3.56	Mealybug	Sucking guild	per three leaves	0	0.22	a
6th crop	1-40 DAT	32.84	67.5	3.56	Thrips	Sucking guild	per sq cm leaf	0	0.22	a
6th crop	1-40 DAT	32.84	67.5	3.56	Whitefly	Sucking guild	per three leaves	0.61	0.81	a
5th crop	91-140 DAT	30.1	86.9	51.8	Ant	Ant guild	per three leaves	0	0.22	a
5th crop	91-140 DAT	30.1	86.9	51.8	BSFB	Chewing guild	per plant	1.26	1.15	b
5th crop	91-140 DAT	30.1	86.9	51.8	Epilachna beetle	Chewing guild	per three leaves	1.98	1.43	a
5th crop	91-140 DAT	30.1	86.9	51.8	Flea beetle	Chewing guild	per three leaves	0	0.22	a
5th crop	91-140 DAT	30.1	86.9	51.8	Lady bird beetle	Predatory guild	per three leaves	0	0.22	a
5th crop	91-140 DAT	30.1	86.9	51.8	Spider	Predatory guild	per three leaves	0.24	0.54	a
5th crop	91-140 DAT	30.1	86.9	51.8	Aphid	Sucking guild	per sq cm leaf	0.37	0.65	a
5th crop	91-140 DAT	30.1	86.9	51.8	Jassid	Sucking guild	per three leaves	0	0.22	a
5th crop	91-140 DAT	30.1	86.9	51.8	Mealybug	Sucking guild	per three leaves	0.1	0.39	a
5th crop	91-140 DAT	30.1	86.9	51.8	Thrips	Sucking guild	per sq cm leaf	0	0.22	a
5th crop	91-140 DAT	30.1	86.9	51.8	Whitefly	Sucking guild	per three leaves	0.45	0.71	a
6th crop	41-90 DAT	30.1	86.9	51.8	Ant	Ant guild	per three leaves	2.64	1.64	b
6th crop	41-90 DAT	30.1	86.9	51.8	BSFB	Chewing guild	per plant	1.44	1.22	b
6th crop	41-90 DAT	30.1	86.9	51.8	Epilachna beetle	Chewing guild	per three leaves	2.38	1.56	a
6th crop	41-90 DAT	30.1	86.9	51.8	Flea beetle	Chewing guild	per three leaves	0.1	0.39	a
6th crop	41-90 DAT	30.1	86.9	51.8	Lady bird beetle	Predatory guild	per three leaves	0	0.22	a
6th crop	41-90 DAT	30.1	86.9	51.8	Spider	Predatory guild	per three leaves	0.04	0.3	a
6th crop	41-90 DAT	30.1	86.9	51.8	Aphid	Sucking guild	per sq cm leaf	1.17	1.11	a
6th crop	41-90 DAT	30.1	86.9	51.8	Jassid	Sucking guild	per three leaves	0.15	0.45	a
6th crop	41-90 DAT	30.1	86.9	51.8	Mealybug	Sucking guild	per three leaves	1.02	1.03	a
6th crop	41-90 DAT	30.1	86.9	51.8	Thrips	Sucking guild	per sq cm leaf	0	0.22	a
6th crop	41-90 DAT	30.1	86.9	51.8	Whitefly	Sucking guild	per three leaves	0.65	0.84	ab
6th crop	91-140 DAT	28.5	89.5	13.4	Ant	Ant guild	per three leaves	0.91	0.98	ab
6th crop	91-140 DAT	28.5	89.5	13.4	BSFB	Chewing guild	per plant	1.08	1.07	b
6th crop	91-140 DAT	28.5	89.5	13.4	Epilachna beetle	Chewing guild	per three leaves	0.41	0.72	b
6th crop	91-140 DAT	28.5	89.5	13.4	Flea beetle	Chewing guild	per three leaves	0.06	0.32	a
6th crop	91-140 DAT	28.5	89.5	13.4	Lady bird beetle	Predatory guild	per three leaves	0	0.22	a
6th crop	91-140 DAT	28.5	89.5	13.4	Spider	Predatory guild	per three leaves	0.24	0.54	b
6th crop	91-140 DAT	28.5	89.5	13.4	Aphid	Sucking guild	per sq cm leaf	2.88	1.71	a
6th crop	91-140 DAT	28.5	89.5	13.4	Jassid	Sucking guild	per three leaves	0	0.22	a
6th crop	91-140 DAT	28.5	89.5	13.4	Mealybug	Sucking guild	per three leaves	0.04	0.3	a
6th crop	91-140 DAT	28.5	89.5	13.4	Thrips	Sucking guild	per sq cm leaf	0	0.22	a
6th crop	91-140 DAT	28.5	89.5	13.4	Whitefly	Sucking guild	per three leaves	0.31	0.6	ab
7th crop	1-40 DAT	30.1	86.9	51.8	Ant	Ant guild	per three leaves	2.14	1.48	b
7th crop	1-40 DAT	30.1	86.9	51.8	BSFB	Chewing guild	per plant	0.2	0.5	a
7th crop	1-40 DAT	30.1	86.9	51.8	Epilachna beetle	Chewing guild	per three leaves	0.88	0.96	a
7th crop	1-40 DAT	30.1	86.9	51.8	Flea beetle	Chewing guild	per three leaves	0.14	0.44	a
7th crop	1-40 DAT	30.1	86.9	51.8	Lady bird beetle	Predatory guild	per three leaves	0	0.22	a
7th crop	1-40 DAT	30.1	86.9	51.8	Spider	Predatory guild	per three leaves	0.14	0.44	a
7th crop	1-40 DAT	30.1	86.9	51.8	Aphid	Sucking guild	per sq cm leaf	0.95	1	a
7th crop	1-40 DAT	30.1	86.9	51.8	Jassid	Sucking guild	per three leaves	0.1	0.39	a
7th crop	1-40 DAT	30.1	86.9	51.8	Mealybug	Sucking guild	per three leaves	0.02	0.27	a
7th crop	1-40 DAT	30.1	86.9	51.8	Thrips	Sucking guild	per sq cm leaf	0	0.22	a
7th crop	1-40 DAT	30.1	86.9	51.8	Whitefly	Sucking guild	per three leaves	1.28	1.15	b
7th crop	41-90 DAT	28.5	89.5	13.4	Ant	Ant guild	per three leaves	2.48	1.591	b
7th crop	41-90 DAT	28.5	89.5	13.4	BSFB	Chewing guild	per plant	1.18	1.11	b
7th crop	41-90 DAT	28.5	89.5	13.4	Epilachna beetle	Chewing guild	per three leaves	0.85	0.95	b
7th crop	41-90 DAT	28.5	89.5	13.4	Flea beetle	Chewing guild	per three leaves	0.06	0.33	a
7th crop	41-90 DAT	28.5	89.5	13.4	Lady bird beetle	Predatory guild	per three leaves	0.04	0.3	a
7th crop	41-90 DAT	28.5	89.5	13.4	Spider	Predatory guild	per three leaves	0.17	0.47	b
7th crop	41-90 DAT	28.5	89.5	13.4	Aphid	Sucking guild	per sq cm leaf	37.53	6.13	b
7th crop	41-90 DAT	28.5	89.5	13.4	Jassid	Sucking guild	per three leaves	0.17	0.47	a
7th crop	41-90 DAT	28.5	89.5	13.4	Mealybug	Sucking guild	per three leaves	0	0.22	a
7th crop	41-90 DAT	28.5	89.5	13.4	Thrips	Sucking guild	per sq cm leaf	0.32	0.61	a
7th crop	41-90 DAT	28.5	89.5	13.4	Whitefly	Sucking guild	per three leaves	0.37	0.65	b
7th crop	91-140 DAT	26.8	81.7	4.8	Ant	Ant guild	per three leaves	1.17	1.11	a
7th crop	91-140 DAT	26.8	81.7	4.8	BSFB	Chewing guild	per plant	0.82	0.93	b
7th crop	91-140 DAT	26.8	81.7	4.8	Epilachna beetle	Chewing guild	per three leaves	0.02	0.27	a
7th crop	91-140 DAT	26.8	81.7	4.8	Flea beetle	Chewing guild	per three leaves	0.06	0.33	a
7th crop	91-140 DAT	26.8	81.7	4.8	Lady bird beetle	Predatory guild	per three leaves	0.04	0.3	a
7th crop	91-140 DAT	26.8	81.7	4.8	Spider	Predatory guild	per three leaves	0.06	0.33	a
7th crop	91-140 DAT	26.8	81.7	4.8	Aphid	Sucking guild	per sq cm leaf	16.62	4.03	b
7th crop	91-140 DAT	26.8	81.7	4.8	Jassid	Sucking guild	per three leaves	0.83	0.94	b
7th crop	91-140 DAT	26.8	81.7	4.8	Mealybug	Sucking guild	per three leaves	0	0.22	a
7th crop	91-140 DAT	26.8	81.7	4.8	Thrips	Sucking guild	per sq cm leaf	5.45	2.35	b
7th crop	91-140 DAT	26.8	81.7	4.8	Whitefly	Sucking guild	per three leaves	0.61	0.81	a
8th crop	1-40 DAT	28.5	89.5	13.4	Ant	Ant guild	per three leaves	0.15	0.45	a
8th crop	1-40 DAT	28.5	89.5	13.4	BSFB	Chewing guild	per plant	0	0.22	a
8th crop	1-40 DAT	28.5	89.5	13.4	Epilachna beetle	Chewing guild	per three leaves	0	0.22	a
8th crop	1-40 DAT	28.5	89.5	13.4	Flea beetle	Chewing guild	per three leaves	0	0.22	a
8th crop	1-40 DAT	28.5	89.5	13.4	Lady bird beetle	Predatory guild	per three leaves	0	0.22	a
8th crop	1-40 DAT	28.5	89.5	13.4	Spider	Predatory guild	per three leaves	0	0.22	a
8th crop	1-40 DAT	28.5	89.5	13.4	Aphid	Sucking guild	per sq cm leaf	0.8	0.92	a
8th crop	1-40 DAT	28.5	89.5	13.4	Jassid	Sucking guild	per three leaves	0.2	0.5	a
8th crop	1-40 DAT	28.5	89.5	13.4	Mealybug	Sucking guild	per three leaves	0	0.22	a
8th crop	1-40 DAT	28.5	89.5	13.4	Thrips	Sucking guild	per sq cm leaf	0	0.22	a
8th crop	1-40 DAT	28.5	89.5	13.4	Whitefly	Sucking guild	per three leaves	0.02	0.27	a
8th crop	41-90 DAT	26.8	81.7	4.8	Ant	Ant guild	per three leaves	0.54	0.77	a
8th crop	41-90 DAT	26.8	81.7	4.8	BSFB	Chewing guild	per plant	0.61	0.81	b
8th crop	41-90 DAT	26.8	81.7	4.8	Epilachna beetle	Chewing guild	per three leaves	0.24	0.54	a
8th crop	41-90 DAT	26.8	81.7	4.8	Flea beetle	Chewing guild	per three leaves	0.1	0.39	a
8th crop	41-90 DAT	26.8	81.7	4.8	Lady bird beetle	Predatory guild	per three leaves	0.06	0.33	a
8th crop	41-90 DAT	26.8	81.7	4.8	Spider	Predatory guild	per three leaves	0.08	0.36	a
8th crop	41-90 DAT	26.8	81.7	4.8	Aphid	Sucking guild	per sq cm leaf	14.27	3.784	b
8th crop	41-90 DAT	26.8	81.7	4.8	Jassid	Sucking guild	per three leaves	0.84	0.94	b
8th crop	41-90 DAT	26.8	81.7	4.8	Mealybug	Sucking guild	per three leaves	0.08	0.36	a
8th crop	41-90 DAT	26.8	81.7	4.8	Thrips	Sucking guild	per sq cm leaf	10.85	3.3	c
8th crop	41-90 DAT	26.8	81.7	4.8	Whitefly	Sucking guild	per three leaves	2.04	1.45	b
8th crop	91-140 DAT	18.3	77.8	0	Ant	Ant guild	per three leaves	0.37	0.65	b
8th crop	91-140 DAT	18.3	77.8	0	BSFB	Chewing guild	per plant	0.17	1.19	b
8th crop	91-140 DAT	18.3	77.8	0	Epilachna beetle	Chewing guild	per three leaves	0.05	0.32	a
8th crop	91-140 DAT	18.3	77.8	0	Flea beetle	Chewing guild	per three leaves	0.03	0.61	b
8th crop	91-140 DAT	18.3	77.8	0	Lady bird beetle	Predatory guild	per three leaves	0.05	0.32	a
8th crop	91-140 DAT	18.3	77.8	0	Spider	Predatory guild	per three leaves	0.03	0.28	a
8th crop	91-140 DAT	18.3	77.8	0	Aphid	Sucking guild	per sq cm leaf	2.11	1.47	a
8th crop	91-140 DAT	18.3	77.8	0	Jassid	Sucking guild	per three leaves	0.645	0.83	b
8th crop	91-140 DAT	18.3	77.8	0	Mealybug	Sucking guild	per three leaves	0	0.224	a
8th crop	91-140 DAT	18.3	77.8	0	Thrips	Sucking guild	per sq cm leaf	1.2	2.55	c
8th crop	91-140 DAT	18.3	77.8	0	Whitefly	Sucking guild	per three leaves	1.745	1.34	a
9th crop	1-40 DAT	26.8	81.7	4.8	Ant	Ant guild	per three leaves	0.71	0.87	a
9th crop	1-40 DAT	26.8	81.7	4.8	BSFB	Chewing guild	per plant	0	0.22	a
9th crop	1-40 DAT	26.8	81.7	4.8	Epilachna beetle	Chewing guild	per three leaves	0.06	0.33	a
9th crop	1-40 DAT	26.8	81.7	4.8	Flea beetle	Chewing guild	per three leaves	0.1	0.39	a
9th crop	1-40 DAT	26.8	81.7	4.8	Lady bird beetle	Predatory guild	per three leaves	0.02	0.27	a
9th crop	1-40 DAT	26.8	81.7	4.8	Spider	Predatory guild	per three leaves	0.04	0.3	a
9th crop	1-40 DAT	26.8	81.7	4.8	Aphid	Sucking guild	per sq cm leaf	1.02	1.04	a
9th crop	1-40 DAT	26.8	81.7	4.8	Jassid	Sucking guild	per three leaves	0.06	0.33	a
9th crop	1-40 DAT	26.8	81.7	4.8	Mealybug	Sucking guild	per three leaves	0	0.22	a
9th crop	1-40 DAT	26.8	81.7	4.8	Thrips	Sucking guild	per sq cm leaf	0	0.22	a
9th crop	1-40 DAT	26.8	81.7	4.8	Whitefly	Sucking guild	per three leaves	0.45	0.71	a
9th crop	41-90 DAT	18.3	77.8	0	Ant	Ant guild	per three leaves	0.6	0.781	b
9th crop	41-90 DAT	18.3	77.8	0	BSFB	Chewing guild	per plant	0.35	0.63	ab
9th crop	41-90 DAT	18.3	77.8	0	Epilachna beetle	Chewing guild	per three leaves	0.08	0.36	a
9th crop	41-90 DAT	18.3	77.8	0	Flea beetle	Chewing guild	per three leaves	0.04	0.3	a
9th crop	41-90 DAT	18.3	77.8	0	Lady bird beetle	Predatory guild	per three leaves	0.1	0.39	a
9th crop	41-90 DAT	18.3	77.8	0	Spider	Predatory guild	per three leaves	0.06	0.33	a
9th crop	41-90 DAT	18.3	77.8	0	Aphid	Sucking guild	per sq cm leaf	3.12	1.78	a
9th crop	41-90 DAT	18.3	77.8	0	Jassid	Sucking guild	per three leaves	1.21	1.12	b
9th crop	41-90 DAT	18.3	77.8	0	Mealybug	Sucking guild	per three leaves	0	0.224	a
9th crop	41-90 DAT	18.3	77.8	0	Thrips	Sucking guild	per sq cm leaf	2.16	1.49	b
9th crop	41-90 DAT	18.3	77.8	0	Whitefly	Sucking guild	per three leaves	3.1	1.78	b
9th crop	91-140 DAT	21	67.7	0	Ant	Ant guild	per three leaves	0.29	0.59	a
9th crop	91-140 DAT	21	67.7	0	BSFB	Chewing guild	per plant	0.47	0.72	b
9th crop	91-140 DAT	21	67.7	0	Epilachna beetle	Chewing guild	per three leaves	0.07	0.35	a
9th crop	91-140 DAT	21	67.7	0	Flea beetle	Chewing guild	per three leaves	0.19	0.49	a
9th crop	91-140 DAT	21	67.7	0	Lady bird beetle	Predatory guild	per three leaves	0.14	0.44	b
9th crop	91-140 DAT	21	67.7	0	Spider	Predatory guild	per three leaves	0.05	0.31	a
9th crop	91-140 DAT	21	67.7	0	Aphid	Sucking guild	per sq cm leaf	8.72	2.962	b
9th crop	91-140 DAT	21	67.7	0	Jassid	Sucking guild	per three leaves	1.44	1.22	b
9th crop	91-140 DAT	21	67.7	0	Mealybug	Sucking guild	per three leaves	0	0.224	a
9th crop	91-140 DAT	21	67.7	0	Thrips	Sucking guild	per sq cm leaf	8.68	2.96	b
9th crop	91-140 DAT	21	67.7	0	Whitefly	Sucking guild	per three leaves	2.81	1.69	b
10th crop	1-40 DAT	18.3	77.8	0	Ant	Ant guild	per three leaves	0.15	0.45	a
10th crop	1-40 DAT	18.3	77.8	0	BSFB	Chewing guild	per plant	0	0.22	a
10th crop	1-40 DAT	18.3	77.8	0	Epilachna beetle	Chewing guild	per three leaves	0.02	0.27	a
10th crop	1-40 DAT	18.3	77.8	0	Flea beetle	Chewing guild	per three leaves	0.02	0.27	a
10th crop	1-40 DAT	18.3	77.8	0	Lady bird beetle	Predatory guild	per three leaves	0	0.22	a
10th crop	1-40 DAT	18.3	77.8	0	Spider	Predatory guild	per three leaves	0	0.22	a
10th crop	1-40 DAT	18.3	77.8	0	Aphid	Sucking guild	per sq cm leaf	1.1	1.02	a
10th crop	1-40 DAT	18.3	77.8	0	Jassid	Sucking guild	per three leaves	0.08	0.36	a
10th crop	1-40 DAT	18.3	77.8	0	Mealybug	Sucking guild	per three leaves	0	0.22	a
10th crop	1-40 DAT	18.3	77.8	0	Thrips	Sucking guild	per sq cm leaf	0.25	0.55	a
10th crop	1-40 DAT	18.3	77.8	0	Whitefly	Sucking guild	per three leaves	0.39	0.66	a
10th crop	41-90 DAT	21	67.7	0	Ant	Ant guild	per three leaves	0.33	0.62	a
10th crop	41-90 DAT	21	67.7	0	BSFB	Chewing guild	per plant	0.94	0.1	b
10th crop	41-90 DAT	21	67.7	0	Epilachna beetle	Chewing guild	per three leaves	0.14	0.44	b
10th crop	41-90 DAT	21	67.7	0	Flea beetle	Chewing guild	per three leaves	0.18	0.48	a
10th crop	41-90 DAT	21	67.7	0	Lady bird beetle	Predatory guild	per three leaves	0.24	0.54	b
10th crop	41-90 DAT	21	67.7	0	Spider	Predatory guild	per three leaves	0.1	0.38	a
10th crop	41-90 DAT	21	67.7	0	Aphid	Sucking guild	per sq cm leaf	17.45	4.183	b
10th crop	41-90 DAT	21	67.7	0	Jassid	Sucking guild	per three leaves	2.65	1.64	b
10th crop	41-90 DAT	21	67.7	0	Mealybug	Sucking guild	per three leaves	0	0.224	a
10th crop	41-90 DAT	21	67.7	0	Thrips	Sucking guild	per sq cm leaf	17.37	4.17	b
10th crop	41-90 DAT	21	67.7	0	Whitefly	Sucking guild	per three leaves	4.72	2.18	c
11th crop	1-40 DAT	21	67.7	0	Ant	Ant guild	per three leaves	0.26	0.56	a
11th crop	1-40 DAT	21	67.7	0	BSFB	Chewing guild	per plant	0	0.22	a
11th crop	1-40 DAT	21	67.7	0	Epilachna beetle	Chewing guild	per three leaves	0	0.22	a
11th crop	1-40 DAT	21	67.7	0	Flea beetle	Chewing guild	per three leaves	0.2	0.5	a
11th crop	1-40 DAT	21	67.7	0	Lady bird beetle	Predatory guild	per three leaves	0.04	0.3	a
11th crop	1-40 DAT	21	67.7	0	Spider	Predatory guild	per three leaves	0	0.22	a
11th crop	1-40 DAT	21	67.7	0	Aphid	Sucking guild	per sq cm leaf	0	0.224	a
11th crop	1-40 DAT	21	67.7	0	Jassid	Sucking guild	per three leaves	0.24	0.54	a
11th crop	1-40 DAT	21	67.7	0	Mealybug	Sucking guild	per three leaves	0	0.224	a
11th crop	1-40 DAT	21	67.7	0	Thrips	Sucking guild	per sq cm leaf	0	0.24	a
11th crop	1-40 DAT	21	67.7	0	Whitefly	Sucking guild	per three leaves	0.9	0.98	a

## Sheet: S2_Pairwise_ttests
Table S2. Full pairwise t-test contrasts between co-occurring crop-age cohorts under common weather.
Contrasts are based on simultaneously exposed crop cohorts and support the design-based separation of crop age from ambient weather.
Standard week	Arthropod taxon	Guild	Observation unit	Age/crop A	Mean A	Age/crop B	Mean B	Difference (A − B)	Higher mean	t value	Significance	Tmax (°C)	Tmin (°C)	RHmax (%)	RHmin (%)	Rainfall (mm)
31-44	Ant	Ant guild	per three leaves	70-160 Days (1st crop)	1.32	07-90days (2nd crop)	0.3	1.02	A	-4.24	**	33.86	25.19	95.14	66.79	35.53
31-44	BSFB	Chewing guild	per plant	70-160 Days (1st crop)	1.38	07-90days (2nd crop)	0.14	1.24	A	-9.83	**	33.86	25.19	95.14	66.79	35.53
31-44	Epilachna beetle	Chewing guild	per three leaves	70-160 Days (1st crop)	0.17	07-90days (2nd crop)	0.59	-0.42	B	1.36	ns	33.86	25.19	95.14	66.79	35.53
31-44	Flea beetle	Chewing guild	per three leaves	70-160 Days (1st crop)	0.19	07-90days (2nd crop)	0.04	0.15	A	-2.09	ns	33.86	25.19	95.14	66.79	35.53
31-44	Leaf roller	Chewing guild	per plant	70-160 Days (1st crop)		07-90days (2nd crop)	0.06			-2.06	ns	33.86	25.19	95.14	66.79	35.53
31-44	Lady bird beetle	Predatory guild	per three leaves	70-160 Days (1st crop)	1.83	07-90days (2nd crop)	0.03	1.8	A	-1.34	ns	33.86	25.19	95.14	66.79	35.53
31-44	Spider	Predatory guild	per three leaves	70-160 Days (1st crop)	0.37	07-90days (2nd crop)	0.09	0.28	A	-0.81	ns	33.86	25.19	95.14	66.79	35.53
31-44	Aphid	Sucking guild	per sq cm leaf	70-160 Days (1st crop)	8.66	07-90days (2nd crop)	0.1	8.56	A	-5.8	**	33.86	25.19	95.14	66.79	35.53
31-44	Jassid	Sucking guild	per three leaves	70-160 Days (1st crop)	0.41	07-90days (2nd crop)	0.37	0.04	A	-0.91	ns	33.86	25.19	95.14	66.79	35.53
31-44	Mealybug	Sucking guild	per three leaves	70-160 Days (1st crop)	18.81	07-90days (2nd crop)	0.76	18.05	A	-4.13	**	33.86	25.19	95.14	66.79	35.53
31-44	Whitefly	Sucking guild	per three leaves	70-160 Days (1st crop)	0.86	07-90days (2nd crop)	1.74	-0.88	B	0.24	ns	33.86	25.19	95.14	66.79	35.53
40-01	Ant	Ant guild	per three leaves	70-160 days (2nd crop)	0.05	0 7- 90days (3rd crop)	0.43	-0.38	B	2.35	*	30.12	18.72	93.5	57.36	3.48
40-01	BSFB	Chewing guild	per plant	70-160 days (2nd crop)	0.14	0 7- 90days (3rd crop)	0.19	-0.05	B	-0.07	ns	30.12	18.72	93.5	57.36	3.48
40-01	Epilachna beetle	Chewing guild	per three leaves	70-160 days (2nd crop)	1.45	0 7- 90days (3rd crop)	0.36	1.09	A	-5.79	**	30.12	18.72	93.5	57.36	3.48
40-01	Flea beetle	Chewing guild	per three leaves	70-160 days (2nd crop)	0	0 7- 90days (3rd crop)	0.19	-0.19	B	5.33	**	30.12	18.72	93.5	57.36	3.48
40-01	Leaf roller	Chewing guild	per plant	70-160 days (2nd crop)	0.05	0 7- 90days (3rd crop)	0.04	0.01	A	0.29	ns	30.12	18.72	93.5	57.36	3.48
40-01	Lady bird beetle	Predatory guild	per three leaves	70-160 days (2nd crop)	2.22	0 7- 90days (3rd crop)	0.07	2.15	A	3.28	**	30.12	18.72	93.5	57.36	3.48
40-01	Spider	Predatory guild	per three leaves	70-160 days (2nd crop)	0.41	0 7- 90days (3rd crop)	0.28	0.13	A	1.33	ns	30.12	18.72	93.5	57.36	3.48
40-01	Aphid	Sucking guild	per sq cm leaf	70-160 days (2nd crop)	0.07	0 7- 90days (3rd crop)	2.89	-2.82	B	4.46	**	30.12	18.72	93.5	57.36	3.48
40-01	Jassid	Sucking guild	per three leaves	70-160 days (2nd crop)	1.22	0 7- 90days (3rd crop)	1.5	-0.28	B	-0.05	ns	30.12	18.72	93.5	57.36	3.48
40-01	Mealybug	Sucking guild	per three leaves	70-160 days (2nd crop)	2.3	0 7- 90days (3rd crop)				-9.24	**	30.12	18.72	93.5	57.36	3.48
40-01	Thrips	Sucking guild	per sq cm leaf	70-160 days (2nd crop)		0 7- 90days (3rd crop)	4.34			5.74	**	30.12	18.72	93.5	57.36	3.48
40-01	Whitefly	Sucking guild	per three leaves	70-160 days (2nd crop)	9.48	0 7- 90days (3rd crop)	1.26	8.22	A	-5.62	**	30.12	18.72	93.5	57.36	3.48
40-10	Ant	Ant guild	per three leaves	70-160 Days (3rdCrop)	0.13	07-90 Days (4th crop)	0.17	-0.04	B	0.77	ns	27.18	15.49	92.93	53.93	4.14
40-10	BSFB	Chewing guild	per plant	70-160 Days (3rdCrop)	0.85	07-90 Days (4th crop)	0.86	-0.01	B	-0.47	ns	27.18	15.49	92.93	53.93	4.14
40-10	Epilachna beetle	Chewing guild	per three leaves	70-160 Days (3rdCrop)	0.25	07-90 Days (4th crop)	0.08	0.17	A	-0.82	ns	27.18	15.49	92.93	53.93	4.14
40-10	Flea beetle	Chewing guild	per three leaves	70-160 Days (3rdCrop)	0.17	07-90 Days (4th crop)	0.24	-0.07	B	0.23	ns	27.18	15.49	92.93	53.93	4.14
40-10	Leaf roller	Chewing guild	per plant	70-160 Days (3rdCrop)	0	07-90 Days (4th crop)					ns	27.18	15.49	92.93	53.93	4.14
40-10	Lady bird beetle	Predatory guild	per three leaves	70-160 Days (3rdCrop)	0.1	07-90 Days (4th crop)	0.31	-0.21	B	2.48	*	27.18	15.49	92.93	53.93	4.14
40-10	Spider	Predatory guild	per three leaves	70-160 Days (3rdCrop)	0.38	07-90 Days (4th crop)	0.35	0.03	A	-0.43	ns	27.18	15.49	92.93	53.93	4.14
40-10	Aphid	Sucking guild	per sq cm leaf	70-160 Days (3rdCrop)	28.79	07-90 Days (4th crop)	8.79	20	A	-3.36	**	27.18	15.49	92.93	53.93	4.14
40-10	Jassid	Sucking guild	per three leaves	70-160 Days (3rdCrop)	1.42	07-90 Days (4th crop)	2.05	-0.63	B	0.63	ns	27.18	15.49	92.93	53.93	4.14
40-10	Thrips	Sucking guild	per sq cm leaf	70-160 Days (3rdCrop)	13.9	07-90 Days (4th crop)	9.38	4.52	A	-1.4	ns	27.18	15.49	92.93	53.93	4.14
40-10	Whitefly	Sucking guild	per three leaves	70-160 Days (3rdCrop)	1.32	07-90 Days (4th crop)	4.1	-2.78	B	5.02	**	27.18	15.49	92.93	53.93	4.14
05-18	Ant	Ant guild	per three leaves	70-154 days (4th crop)	0.07	07- 90 Days (5th crop)	0.36	-0.29	B	2.29	*	33.86	22.1	90.64	49.29	6.18
05-18	BSFB	Chewing guild	per plant	70-154 days (4th crop)	1.45	07- 90 Days (5th crop)	0.33	1.12	A	-1.97	ns	33.86	22.1	90.64	49.29	6.18
05-18	Epilachna beetle	Chewing guild	per three leaves	70-154 days (4th crop)	1.21	07- 90 Days (5th crop)	1.2	0.01	A	-0.02	ns	33.86	22.1	90.64	49.29	6.18
05-18	Flea beetle	Chewing guild	per three leaves	70-154 days (4th crop)	0.7	07- 90 Days (5th crop)	0.56	0.14	A	-0.5	ns	33.86	22.1	90.64	49.29	6.18
05-18	Lady bird beetle	Predatory guild	per three leaves	70-154 days (4th crop)	0.31	07- 90 Days (5th crop)	0.03	0.28	A	-2.13	ns	33.86	22.1	90.64	49.29	6.18
05-18	Spider	Predatory guild	per three leaves	70-154 days (4th crop)	0.29	07- 90 Days (5th crop)	0.06	0.23	A	-2.95	*	33.86	22.1	90.64	49.29	6.18
05-18	Aphid	Sucking guild	per sq cm leaf	70-154 days (4th crop)	4.64	07- 90 Days (5th crop)	0.1	4.54	A	-2.58	*	33.86	22.1	90.64	49.29	6.18
05-18	Jassid	Sucking guild	per three leaves	70-154 days (4th crop)	3.58	07- 90 Days (5th crop)	3.48	0.1	A	-1.06	ns	33.86	22.1	90.64	49.29	6.18
05-18	Mealybug	Sucking guild	per three leaves	70-154 days (4th crop)		07- 90 Days (5th crop)	0				ns	33.86	22.1	90.64	49.29	6.18
05-18	Thrips	Sucking guild	per sq cm leaf	70-154 days (4th crop)	12.36	07- 90 Days (5th crop)	4.38	7.98	A	-2.29	*	33.86	22.1	90.64	49.29	6.18
05-18	Whitefly	Sucking guild	per three leaves	70-154 days (4th crop)	3.64	07- 90 Days (5th crop)	1.86	1.78	A	-2.73	*	33.86	22.1	90.64	49.29	6.18
14-27	Ant	Ant guild	per three leaves	70to 160 Days (5th crop)	0.18	07-90 Days (6th crop)	1.5	-1.32	B	3.21	**	36.03	26.07	91.86	63.14	36.68
14-27	BSFB	Chewing guild	per plant	70to 160 Days (5th crop)	1.39	07-90 Days (6th crop)	0.7	0.69	A	-3.14	**	36.03	26.07	91.86	63.14	36.68
14-27	Epilachna beetle	Chewing guild	per three leaves	70to 160 Days (5th crop)	3.47	07-90 Days (6th crop)	3.25	0.22	A	-1.36	ns	36.03	26.07	91.86	63.14	36.68
14-27	Flea beetle	Chewing guild	per three leaves	70to 160 Days (5th crop)	0.3	07-90 Days (6th crop)	0.05	0.25	A	-1.69	ns	36.03	26.07	91.86	63.14	36.68
14-27	Lady bird beetle	Predatory guild	per three leaves	70to 160 Days (5th crop)	0.01	07-90 Days (6th crop)	0.01	0		0	ns	36.03	26.07	91.86	63.14	36.68
14-27	Spider	Predatory guild	per three leaves	70to 160 Days (5th crop)	0.24	07-90 Days (6th crop)	0.04	0.2	A	-3.75	**	36.03	26.07	91.86	63.14	36.68
14-27	Aphid	Sucking guild	per sq cm leaf	70to 160 Days (5th crop)	0.26	07-90 Days (6th crop)	0.7	-0.44	B	1.24	ns	36.03	26.07	91.86	63.14	36.68
14-27	Jassid	Sucking guild	per three leaves	70to 160 Days (5th crop)	1.85	07-90 Days (6th crop)	0.25	1.6	A	-1.67	ns	36.03	26.07	91.86	63.14	36.68
14-27	Mealybug	Sucking guild	per three leaves	70to 160 Days (5th crop)	0.05	07-90 Days (6th crop)	0.36	-0.31	B	0.97	ns	36.03	26.07	91.86	63.14	36.68
14-27	Thrips	Sucking guild	per sq cm leaf	70to 160 Days (5th crop)	2.36	07-90 Days (6th crop)				-2.25	*	36.03	26.07	91.86	63.14	36.68
14-27	Whitefly	Sucking guild	per three leaves	70to 160 Days (5th crop)	0.78	07-90 Days (6th crop)	0.61	0.17	A	-0.5	ns	36.03	26.07	91.86	63.14	36.68
23-35	Ant	Ant guild	per three leaves	70-154 days (6th crop)	1.46	07- 70 Days (7th crop)	2.05	-0.59	B	1.02	ns	32.7	25.63	95.47	78.62	42.25
23-35	BSFB	Chewing guild	per plant	70-154 days (6th crop)	1.29	07- 70 Days (7th crop)	0.57	0.72	A	-2.83	*	32.7	25.63	95.47	78.62	42.25
23-35	Epilachna beetle	Chewing guild	per three leaves	70-154 days (6th crop)	1.35	07- 70 Days (7th crop)	0.93	0.42	A	-0.74	ns	32.7	25.63	95.47	78.62	42.25
23-35	Flea beetle	Chewing guild	per three leaves	70-154 days (6th crop)	0.08	07- 70 Days (7th crop)	0.16	-0.08	B	1.07	ns	32.7	25.63	95.47	78.62	42.25
23-35	Lady bird beetle	Predatory guild	per three leaves	70-154 days (6th crop)	0	07- 70 Days (7th crop)	0.02	-0.02	B	1.48	ns	32.7	25.63	95.47	78.62	42.25
23-35	Spider	Predatory guild	per three leaves	70-154 days (6th crop)	0.13	07- 70 Days (7th crop)	0.25	-0.12	B	1.26	ns	32.7	25.63	95.47	78.62	42.25
23-35	Aphid	Sucking guild	per sq cm leaf	70-154 days (6th crop)	1.56	07- 70 Days (7th crop)	14.87	-13.31	B	2.51	*	32.7	25.63	95.47	78.62	42.25
23-35	Jassid	Sucking guild	per three leaves	70-154 days (6th crop)	0.09	07- 70 Days (7th crop)	0.25	-0.16	B	1.64	ns	32.7	25.63	95.47	78.62	42.25
23-35	Mealybug	Sucking guild	per three leaves	70-154 days (6th crop)	0.41	07- 70 Days (7th crop)	0.01	0.4	A	-1.64	ns	32.7	25.63	95.47	78.62	42.25
23-35	Thrips	Sucking guild	per sq cm leaf	70-154 days (6th crop)		07- 70 Days (7th crop)	0.12			0.17	ns	32.7	25.63	95.47	78.62	42.25
23-35	Whitefly	Sucking guild	per three leaves	70-154 days (6th crop)	0.52	07- 70 Days (7th crop)	0.85	-0.33	B	1.42	ns	32.7	25.63	95.47	78.62	42.25
31-45	Ant	Ant guild	per three leaves	63- 160 Days (7th crop)	1.51	07- 98 Days (8th crop)	0.57	0.94	A	-1.47	ns	32.47	22.77	94.93	75.45	7.18
31-45	BSFB	Chewing guild	per plant	63- 160 Days (7th crop)	1.27	07- 98 Days (8th crop)	0.42	0.85	A	-2.34	ns	32.47	22.77	94.93	75.45	7.18
31-45	Epilachna beetle	Chewing guild	per three leaves	63- 160 Days (7th crop)	0.39	07- 98 Days (8th crop)	0.23	0.16	A	-0.62	ns	32.47	22.77	94.93	75.45	7.18
31-45	Flea beetle	Chewing guild	per three leaves	63- 160 Days (7th crop)	0.04	07- 98 Days (8th crop)	0.12	-0.08	B	1.2	ns	32.47	22.77	94.93	75.45	7.18
31-45	Lady bird beetle	Predatory guild	per three leaves	63- 160 Days (7th crop)	0.04	07- 98 Days (8th crop)	0.03	0.01	A	-0.41	ns	32.47	22.77	94.93	75.45	7.18
31-45	Spider	Predatory guild	per three leaves	63- 160 Days (7th crop)	0.14	07- 98 Days (8th crop)	0.04	0.1	A	-2.19	*	32.47	22.77	94.93	75.45	7.18
31-45	Aphid	Sucking guild	per sq cm leaf	63- 160 Days (7th crop)	20.65	07- 98 Days (8th crop)	10.89	9.76	A	-1.7	ns	32.47	22.77	94.93	75.45	7.18
31-45	Jassid	Sucking guild	per three leaves	63- 160 Days (7th crop)	0.5	07- 98 Days (8th crop)	0.47	0.03	A	-0.25	ns	32.47	22.77	94.93	75.45	7.18
31-45	Mealybug	Sucking guild	per three leaves	63- 160 Days (7th crop)	0.01	07- 98 Days (8th crop)	0.03	-0.02	B	0.56	ns	32.47	22.77	94.93	75.45	7.18
31-45	Thrips	Sucking guild	per sq cm leaf	63- 160 Days (7th crop)	2.2	07- 98 Days (8th crop)	4.7	-2.5	B	2.83	*	32.47	22.77	94.93	75.45	7.18
31-45	Whitefly	Sucking guild	per three leaves	63- 160 Days (7th crop)	0.65	07- 98 Days (8th crop)	1.03	-0.38	B	0.9	ns	32.47	22.77	94.93	75.45	7.18
40-01	Ant	Ant guild	per three leaves	70- 160 Days (8th crops)	0.27	07-90 days (9th crop)	0.84	-0.57	B	3.88	**	29	15.6	95.09	61.48	1.88
40-01	BSFB	Chewing guild	per plant	70- 160 Days (8th crops)	1.43	07-90 days (9th crop)	0.13	1.3	A	-4.91	**	29	15.6	95.09	61.48	1.88
40-01	Epilachna beetle	Chewing guild	per three leaves	70- 160 Days (8th crops)	0.11	07-90 days (9th crop)	0.08	0.03	A	-0.22	ns	29	15.6	95.09	61.48	1.88
40-01	Flea beetle	Chewing guild	per three leaves	70- 160 Days (8th crops)	0.22	07-90 days (9th crop)	0.06	0.16	A	-2.64	*	29	15.6	95.09	61.48	1.88
40-01	Leaf roller	Chewing guild	per plant	70- 160 Days (8th crops)		07-90 days (9th crop)	0				ns	29	15.6	95.09	61.48	1.88
40-01	Lady bird beetle	Predatory guild	per three leaves	70- 160 Days (8th crops)	0.04	07-90 days (9th crop)	0.12	-0.08	B	1.63	ns	29	15.6	95.09	61.48	1.88
40-01	Spider	Predatory guild	per three leaves	70- 160 Days (8th crops)	0.1	07-90 days (9th crop)	0.1	0		-0.09	ns	29	15.6	95.09	61.48	1.88
40-01	Aphid	Sucking guild	per sq cm leaf	70- 160 Days (8th crops)	7.99	07-90 days (9th crop)	2.64	5.35	A	-1.84	ns	29	15.6	95.09	61.48	1.88
40-01	Jassid	Sucking guild	per three leaves	70- 160 Days (8th crops)	0.79	07-90 days (9th crop)	0.56	0.23	A	-1.42	ns	29	15.6	95.09	61.48	1.88
40-01	Mealybug	Sucking guild	per three leaves	70- 160 Days (8th crops)	0.03	07-90 days (9th crop)				-1.47	ns	29	15.6	95.09	61.48	1.88
40-01	Thrips	Sucking guild	per sq cm leaf	70- 160 Days (8th crops)	7.15	07-90 days (9th crop)	0.83	6.32	A	-6.15	**	29	15.6	95.09	61.48	1.88
40-01	Whitefly	Sucking guild	per three leaves	70- 160 Days (8th crops)	1.06	07-90 days (9th crop)	3.01	-1.95	B	1.91	ns	29	15.6	95.09	61.48	1.88
49-10	Ant	Ant guild	per three leaves	70- 160 Days (9th crop)	0.23	07-90days crop (10th crop)	0.75	-0.52	B	1.08	ns	27.4	11.11	94.81	49.47	0
49-10	BSFB	Chewing guild	per plant	70- 160 Days (9th crop)	0.81	07-90days crop (10th crop)	0.55	0.26	A	-1.95	ns	27.4	11.11	94.81	49.47	0
49-10	Epilachna beetle	Chewing guild	per three leaves	70- 160 Days (9th crop)	0.03	07-90days crop (10th crop)	0.06	-0.03	B	1.06	ns	27.4	11.11	94.81	49.47	0
49-10	Flea beetle	Chewing guild	per three leaves	70- 160 Days (9th crop)	0.07	07-90days crop (10th crop)	0.09	-0.02	B	1.22	ns	27.4	11.11	94.81	49.47	0
49-10	Leaf roller	Chewing guild	per plant	70- 160 Days (9th crop)	0.02	07-90days crop (10th crop)				0.17	ns	27.4	11.11	94.81	49.47	0
49-10	Lady bird beetle	Predatory guild	per three leaves	70- 160 Days (9th crop)	0.18	07-90days crop (10th crop)	0.12	0.06	A	-1.68	ns	27.4	11.11	94.81	49.47	0
49-10	Spider	Predatory guild	per three leaves	70- 160 Days (9th crop)	0.06	07-90days crop (10th crop)	0.04	0.02	A	-0.78	ns	27.4	11.11	94.81	49.47	0
49-10	Aphid	Sucking guild	per sq cm leaf	70- 160 Days (9th crop)	5.28	07-90days crop (10th crop)	10.23	-4.95	B	0.7	ns	27.4	11.11	94.81	49.47	0
49-10	Jassid	Sucking guild	per three leaves	70- 160 Days (9th crop)	1.32	07-90days crop (10th crop)	1.44	-0.12	B	-0.49	ns	27.4	11.11	94.81	49.47	0
49-10	Thrips	Sucking guild	per sq cm leaf	70- 160 Days (9th crop)	10.58	07-90days crop (10th crop)	9.81	0.77	A	-93	ns	27.4	11.11	94.81	49.47	0
49-10	Whitefly	Sucking guild	per three leaves	70- 160 Days (9th crop)	2.75	07-90days crop (10th crop)	2.66	0.09	A	-0.75	ns	27.4	11.11	94.81	49.47	0
5-18	Ant	Ant guild	per three leaves	63-154 days (10th crop)	0.19	07- 98 days (11th crop)	0.43	-0.24	B	1.49	ns	32.24	17.43	91.45	48.59	0.2
5-18	BSFB	Chewing guild	per plant	63-154 days (10th crop)	1.98	07- 98 days (11th crop)	0.4	1.58	A	-3.9	**	32.24	17.43	91.45	48.59	0.2
5-18	Epilachna beetle	Chewing guild	per three leaves	63-154 days (10th crop)	1.15	07- 98 days (11th crop)	1.23	-0.08	B	0.79	ns	32.24	17.43	91.45	48.59	0.2
5-18	Flea beetle	Chewing guild	per three leaves	63-154 days (10th crop)	0.31	07- 98 days (11th crop)	0.61	-0.3	B	2.54	*	32.24	17.43	91.45	48.59	0.2
5-18	Lady bird beetle	Predatory guild	per three leaves	63-154 days (10th crop)	0.16	07- 98 days (11th crop)	0.04	0.12	A	-2.04	ns	32.24	17.43	91.45	48.59	0.2
5-18	Spider	Predatory guild	per three leaves	63-154 days (10th crop)	0.1	07- 98 days (11th crop)	0.1	0		-0.43	ns	32.24	17.43	91.45	48.59	0.2
5-18	Aphid	Sucking guild	per sq cm leaf	63-154 days (10th crop)	6.91	07- 98 days (11th crop)	0.12	6.79	A	-3.35	**	32.24	17.43	91.45	48.59	0.2
5-18	Jassid	Sucking guild	per three leaves	63-154 days (10th crop)	2.75	07- 98 days (11th crop)	3.88	-1.13	B	0.16	ns	32.24	17.43	91.45	48.59	0.2
5-18	Mealybug	Sucking guild	per three leaves	63-154 days (10th crop)		07- 98 days (11th crop)	0				ns	32.24	17.43	91.45	48.59	0.2
5-18	Thrips	Sucking guild	per sq cm leaf	63-154 days (10th crop)	22.49	07- 98 days (11th crop)	5.6	16.89	A	-2.82	*	32.24	17.43	91.45	48.59	0.2
5-18	Whitefly	Sucking guild	per three leaves	63-154 days (10th crop)	4.11	07- 98 days (11th crop)	1.96	2.15	A	-3.14	**	32.24	17.43	91.45	48.59	0.2

## Sheet: S3_Trait_correlations
Table S3. Complete host-plant trait correlation matrix for arthropod abundance.
This table combines physico-morphic and biochemical trait correlations. Interpret as screening evidence; model-based summaries are reported in the main manuscript.
Crop	Trait block	Host-plant trait	Arthropod taxon	Guild	Observation unit	Pearson r	Significance	Direction	Strength
1st crop	Biochemical	Carbohydrate mg/g	Ant	Ant guild	per three leaves	0.784	**	positive	strong
1st crop	Biochemical	Carbohydrate mg/g	BSFB	Chewing guild	per plant	0.504	*	positive	moderate
1st crop	Biochemical	Carbohydrate mg/g	Epilachna beetle	Chewing guild	per three leaves	-0.413	ns	negative	weak-to-moderate
1st crop	Biochemical	Carbohydrate mg/g	Flea beetle	Chewing guild	per three leaves	0.362	ns	positive	weak-to-moderate
1st crop	Biochemical	Carbohydrate mg/g	Leaf roller	Chewing guild	per plant	0.622	**	positive	moderate
1st crop	Biochemical	Carbohydrate mg/g	Lady bird beetle	Predatory guild	per three leaves	0.069	ns	positive	weak
1st crop	Biochemical	Carbohydrate mg/g	Spider	Predatory guild	per three leaves	0.736	**	positive	strong
1st crop	Biochemical	Carbohydrate mg/g	Aphid	Sucking guild	per sq cm leaf	0.478	*	positive	weak-to-moderate
1st crop	Biochemical	Carbohydrate mg/g	Jassid	Sucking guild	per three leaves	0.895	**	positive	strong
1st crop	Biochemical	Carbohydrate mg/g	Mealybug	Sucking guild	per three leaves	0.608	**	positive	moderate
1st crop	Biochemical	Carbohydrate mg/g	Whitefly	Sucking guild	per three leaves	0.077	ns	positive	weak
1st crop	Biochemical	Phenolics	Ant	Ant guild	per three leaves	-0.178	ns	negative	weak
1st crop	Biochemical	Phenolics	BSFB	Chewing guild	per plant	0.064	ns	positive	weak
1st crop	Biochemical	Phenolics	Epilachna beetle	Chewing guild	per three leaves	0.28	ns	positive	weak
1st crop	Biochemical	Phenolics	Flea beetle	Chewing guild	per three leaves	0.079	ns	positive	weak
1st crop	Biochemical	Phenolics	Leaf roller	Chewing guild	per plant	-0.174	ns	negative	weak
1st crop	Biochemical	Phenolics	Lady bird beetle	Predatory guild	per three leaves	-0.309	ns	negative	weak-to-moderate
1st crop	Biochemical	Phenolics	Spider	Predatory guild	per three leaves	-0.422	ns	negative	weak-to-moderate
1st crop	Biochemical	Phenolics	Aphid	Sucking guild	per sq cm leaf	-0.424	ns	negative	weak-to-moderate
1st crop	Biochemical	Phenolics	Jassid	Sucking guild	per three leaves	-0.146	ns	negative	weak
1st crop	Biochemical	Phenolics	Mealybug	Sucking guild	per three leaves	-0.417	ns	negative	weak-to-moderate
1st crop	Biochemical	Phenolics	Whitefly	Sucking guild	per three leaves	0.179	ns	positive	weak
1st crop	Biochemical	Protein	Ant	Ant guild	per three leaves	0.811	**	positive	strong
1st crop	Biochemical	Protein	BSFB	Chewing guild	per plant	0.498	*	positive	weak-to-moderate
1st crop	Biochemical	Protein	Epilachna beetle	Chewing guild	per three leaves	-0.39	ns	negative	weak-to-moderate
1st crop	Biochemical	Protein	Flea beetle	Chewing guild	per three leaves	0.34	ns	positive	weak-to-moderate
1st crop	Biochemical	Protein	Leaf roller	Chewing guild	per plant	0.655	**	positive	moderate
1st crop	Biochemical	Protein	Lady bird beetle	Predatory guild	per three leaves	0.039	ns	positive	weak
1st crop	Biochemical	Protein	Spider	Predatory guild	per three leaves	0.735	**	positive	strong
1st crop	Biochemical	Protein	Aphid	Sucking guild	per sq cm leaf	0.427	ns	positive	weak-to-moderate
1st crop	Biochemical	Protein	Jassid	Sucking guild	per three leaves	0.902	**	positive	strong
1st crop	Biochemical	Protein	Mealybug	Sucking guild	per three leaves	0.605	**	positive	moderate
1st crop	Biochemical	Protein	Whitefly	Sucking guild	per three leaves	0.12	ns	positive	weak
1st crop	Biochemical	Total Chlorophyll mg/g	Ant	Ant guild	per three leaves	0.547	*	positive	moderate
1st crop	Biochemical	Total Chlorophyll mg/g	BSFB	Chewing guild	per plant	0.368	ns	positive	weak-to-moderate
1st crop	Biochemical	Total Chlorophyll mg/g	Epilachna beetle	Chewing guild	per three leaves	-0.072	ns	negative	weak
1st crop	Biochemical	Total Chlorophyll mg/g	Flea beetle	Chewing guild	per three leaves	0.258	ns	positive	weak
1st crop	Biochemical	Total Chlorophyll mg/g	Leaf roller	Chewing guild	per plant	0.447	*	positive	weak-to-moderate
1st crop	Biochemical	Total Chlorophyll mg/g	Lady bird beetle	Predatory guild	per three leaves	-0.039	ns	negative	weak
1st crop	Biochemical	Total Chlorophyll mg/g	Spider	Predatory guild	per three leaves	0.478	*	positive	weak-to-moderate
1st crop	Biochemical	Total Chlorophyll mg/g	Aphid	Sucking guild	per sq cm leaf	0.678	**	positive	moderate
1st crop	Biochemical	Total Chlorophyll mg/g	Jassid	Sucking guild	per three leaves	0.473	*	positive	weak-to-moderate
1st crop	Biochemical	Total Chlorophyll mg/g	Mealybug	Sucking guild	per three leaves	0.627	**	positive	moderate
1st crop	Biochemical	Total Chlorophyll mg/g	Whitefly	Sucking guild	per three leaves	-0.171	ns	negative	weak
2nd crop	Biochemical	Carbohydrate mg/g	Ant	Ant guild	per three leaves	-0.079	ns	negative	weak
2nd crop	Biochemical	Carbohydrate mg/g	BSFB	Chewing guild	per plant	-0.02	ns	negative	weak
2nd crop	Biochemical	Carbohydrate mg/g	Epilachna beetle	Chewing guild	per three leaves	0.889	**	positive	strong
2nd crop	Biochemical	Carbohydrate mg/g	Flea beetle	Chewing guild	per three leaves	-0.363	ns	negative	weak-to-moderate
2nd crop	Biochemical	Carbohydrate mg/g	Leaf roller	Chewing guild	per plant	0.232	ns	positive	weak
2nd crop	Biochemical	Carbohydrate mg/g	Spodoptera sp.	Chewing guild	per plant	0.352	ns	positive	weak-to-moderate
2nd crop	Biochemical	Carbohydrate mg/g	Lady bird beetle	Predatory guild	per three leaves	0.547	*	positive	moderate
2nd crop	Biochemical	Carbohydrate mg/g	Spider	Predatory guild	per three leaves	0.5	*	positive	moderate
2nd crop	Biochemical	Carbohydrate mg/g	Aphid	Sucking guild	per sq cm leaf	0.08	ns	positive	weak
2nd crop	Biochemical	Carbohydrate mg/g	Jassid	Sucking guild	per three leaves	0.9	**	positive	strong
2nd crop	Biochemical	Carbohydrate mg/g	Mealybug	Sucking guild	per three leaves	0.784	**	positive	strong
2nd crop	Biochemical	Carbohydrate mg/g	Whitefly	Sucking guild	per three leaves	0.715	**	positive	strong
2nd crop	Biochemical	Phenolics	Ant	Ant guild	per three leaves	0.164	ns	positive	weak
2nd crop	Biochemical	Phenolics	BSFB	Chewing guild	per plant	-0.632	**	negative	moderate
2nd crop	Biochemical	Phenolics	Epilachna beetle	Chewing guild	per three leaves	-0.629	**	negative	moderate
2nd crop	Biochemical	Phenolics	Flea beetle	Chewing guild	per three leaves	0.299	ns	positive	weak
2nd crop	Biochemical	Phenolics	Leaf roller	Chewing guild	per plant	-0.269	ns	negative	weak
2nd crop	Biochemical	Phenolics	Spodoptera sp.	Chewing guild	per plant	-0.364	ns	negative	weak-to-moderate
2nd crop	Biochemical	Phenolics	Lady bird beetle	Predatory guild	per three leaves	-0.131	ns	negative	weak
2nd crop	Biochemical	Phenolics	Spider	Predatory guild	per three leaves	-0.763	**	negative	strong
2nd crop	Biochemical	Phenolics	Aphid	Sucking guild	per sq cm leaf	-0.394	ns	negative	weak-to-moderate
2nd crop	Biochemical	Phenolics	Jassid	Sucking guild	per three leaves	-0.508	*	negative	moderate
2nd crop	Biochemical	Phenolics	Mealybug	Sucking guild	per three leaves	-0.486	*	negative	weak-to-moderate
2nd crop	Biochemical	Phenolics	Whitefly	Sucking guild	per three leaves	-0.223	ns	negative	weak
2nd crop	Biochemical	Protein	Ant	Ant guild	per three leaves	-0.094	ns	negative	weak
2nd crop	Biochemical	Protein	BSFB	Chewing guild	per plant	-0.036	ns	negative	weak
2nd crop	Biochemical	Protein	Epilachna beetle	Chewing guild	per three leaves	0.88	**	positive	strong
2nd crop	Biochemical	Protein	Flea beetle	Chewing guild	per three leaves	-0.355	ns	negative	weak-to-moderate
2nd crop	Biochemical	Protein	Leaf roller	Chewing guild	per plant	0.212	ns	positive	weak
2nd crop	Biochemical	Protein	Spodoptera sp.	Chewing guild	per plant	0.389	ns	positive	weak-to-moderate
2nd crop	Biochemical	Protein	Lady bird beetle	Predatory guild	per three leaves	0.539	*	positive	moderate
2nd crop	Biochemical	Protein	Spider	Predatory guild	per three leaves	0.517	*	positive	moderate
2nd crop	Biochemical	Protein	Aphid	Sucking guild	per sq cm leaf	0.086	ns	positive	weak
2nd crop	Biochemical	Protein	Jassid	Sucking guild	per three leaves	0.88	**	positive	strong
2nd crop	Biochemical	Protein	Mealybug	Sucking guild	per three leaves	0.778	**	positive	strong
2nd crop	Biochemical	Protein	Whitefly	Sucking guild	per three leaves	0.711	**	positive	strong
2nd crop	Biochemical	Total Chlorophyll mg/g	Ant	Ant guild	per three leaves	0.035	ns	positive	weak
2nd crop	Biochemical	Total Chlorophyll mg/g	BSFB	Chewing guild	per plant	0.232	ns	positive	weak
2nd crop	Biochemical	Total Chlorophyll mg/g	Epilachna beetle	Chewing guild	per three leaves	0.687	**	positive	moderate
2nd crop	Biochemical	Total Chlorophyll mg/g	Flea beetle	Chewing guild	per three leaves	-0.284	ns	negative	weak
2nd crop	Biochemical	Total Chlorophyll mg/g	Leaf roller	Chewing guild	per plant	0.515	*	positive	moderate
2nd crop	Biochemical	Total Chlorophyll mg/g	Spodoptera sp.	Chewing guild	per plant	0.259	ns	positive	weak
2nd crop	Biochemical	Total Chlorophyll mg/g	Lady bird beetle	Predatory guild	per three leaves	0.361	ns	positive	weak-to-moderate
2nd crop	Biochemical	Total Chlorophyll mg/g	Spider	Predatory guild	per three leaves	0.614	**	positive	moderate
2nd crop	Biochemical	Total Chlorophyll mg/g	Aphid	Sucking guild	per sq cm leaf	-0.005	ns	negative	weak
2nd crop	Biochemical	Total Chlorophyll mg/g	Jassid	Sucking guild	per three leaves	0.728	**	positive	strong
2nd crop	Biochemical	Total Chlorophyll mg/g	Mealybug	Sucking guild	per three leaves	0.579	**	positive	moderate
2nd crop	Biochemical	Total Chlorophyll mg/g	Whitefly	Sucking guild	per three leaves	0.499	*	positive	weak-to-moderate
3rd crop	Biochemical	Carbohydrate mg/g	Ant	Ant guild	per three leaves	-0.419	ns	negative	weak-to-moderate
3rd crop	Biochemical	Carbohydrate mg/g	BSFB	Chewing guild	per plant	0.376	ns	positive	weak-to-moderate
3rd crop	Biochemical	Carbohydrate mg/g	Epilachna beetle	Chewing guild	per three leaves	-0.111	ns	negative	weak
3rd crop	Biochemical	Carbohydrate mg/g	Flea beetle	Chewing guild	per three leaves	-0.367	ns	negative	weak-to-moderate
3rd crop	Biochemical	Carbohydrate mg/g	Leaf roller	Chewing guild	per plant	-0.288	ns	negative	weak
3rd crop	Biochemical	Carbohydrate mg/g	Lady bird beetle	Predatory guild	per three leaves	-0.003	ns	negative	weak
3rd crop	Biochemical	Carbohydrate mg/g	Spider	Predatory guild	per three leaves	0.202	ns	positive	weak
3rd crop	Biochemical	Carbohydrate mg/g	Aphid	Sucking guild	per sq cm leaf	0.794	**	positive	strong
3rd crop	Biochemical	Carbohydrate mg/g	Jassid	Sucking guild	per three leaves	0.295	ns	positive	weak
3rd crop	Biochemical	Carbohydrate mg/g	Thrips	Sucking guild	per sq cm leaf	0.769	**	positive	strong
3rd crop	Biochemical	Carbohydrate mg/g	Whitefly	Sucking guild	per three leaves	0.2	ns	positive	weak
3rd crop	Biochemical	Phenolics	Ant	Ant guild	per three leaves	0.195	ns	positive	weak
3rd crop	Biochemical	Phenolics	BSFB	Chewing guild	per plant	-0.387	ns	negative	weak-to-moderate
3rd crop	Biochemical	Phenolics	Epilachna beetle	Chewing guild	per three leaves	-0.495	*	negative	weak-to-moderate
3rd crop	Biochemical	Phenolics	Flea beetle	Chewing guild	per three leaves	0.103	ns	positive	weak
3rd crop	Biochemical	Phenolics	Leaf roller	Chewing guild	per plant	0.134	ns	positive	weak
3rd crop	Biochemical	Phenolics	Lady bird beetle	Predatory guild	per three leaves	-0.001	ns	negative	weak
3rd crop	Biochemical	Phenolics	Spider	Predatory guild	per three leaves	-0.436	ns	negative	weak-to-moderate
3rd crop	Biochemical	Phenolics	Aphid	Sucking guild	per sq cm leaf	-0.231	ns	negative	weak
3rd crop	Biochemical	Phenolics	Jassid	Sucking guild	per three leaves	-0.873	**	negative	strong
3rd crop	Biochemical	Phenolics	Thrips	Sucking guild	per sq cm leaf	-0.199	ns	negative	weak
3rd crop	Biochemical	Phenolics	Whitefly	Sucking guild	per three leaves	-0.697	**	negative	moderate
3rd crop	Biochemical	Protein	Ant	Ant guild	per three leaves	-0.47	*	negative	weak-to-moderate
3rd crop	Biochemical	Protein	BSFB	Chewing guild	per plant	0.308	ns	positive	weak-to-moderate
3rd crop	Biochemical	Protein	Epilachna beetle	Chewing guild	per three leaves	-0.135	ns	negative	weak
3rd crop	Biochemical	Protein	Flea beetle	Chewing guild	per three leaves	-0.333	ns	negative	weak-to-moderate
3rd crop	Biochemical	Protein	Leaf roller	Chewing guild	per plant	-0.283	ns	negative	weak
3rd crop	Biochemical	Protein	Lady bird beetle	Predatory guild	per three leaves	0.012	ns	positive	weak
3rd crop	Biochemical	Protein	Spider	Predatory guild	per three leaves	0.191	ns	positive	weak
3rd crop	Biochemical	Protein	Aphid	Sucking guild	per sq cm leaf	0.771	**	positive	strong
3rd crop	Biochemical	Protein	Jassid	Sucking guild	per three leaves	0.285	ns	positive	weak
3rd crop	Biochemical	Protein	Thrips	Sucking guild	per sq cm leaf	0.754	**	positive	strong
3rd crop	Biochemical	Protein	Whitefly	Sucking guild	per three leaves	0.173	ns	positive	weak
3rd crop	Biochemical	Total Chlorophyll mg/g	Ant	Ant guild	per three leaves	-0.521	*	negative	moderate
3rd crop	Biochemical	Total Chlorophyll mg/g	BSFB	Chewing guild	per plant	0.179	ns	positive	weak
3rd crop	Biochemical	Total Chlorophyll mg/g	Epilachna beetle	Chewing guild	per three leaves	0.006	ns	positive	weak
3rd crop	Biochemical	Total Chlorophyll mg/g	Flea beetle	Chewing guild	per three leaves	-0.16	ns	negative	weak
3rd crop	Biochemical	Total Chlorophyll mg/g	Leaf roller	Chewing guild	per plant	-0.06	ns	negative	weak
3rd crop	Biochemical	Total Chlorophyll mg/g	Lady bird beetle	Predatory guild	per three leaves	-0.054	ns	negative	weak
3rd crop	Biochemical	Total Chlorophyll mg/g	Spider	Predatory guild	per three leaves	0.267	ns	positive	weak
3rd crop	Biochemical	Total Chlorophyll mg/g	Aphid	Sucking guild	per sq cm leaf	0.452	*	positive	weak-to-moderate
3rd crop	Biochemical	Total Chlorophyll mg/g	Jassid	Sucking guild	per three leaves	0.407	ns	positive	weak-to-moderate
3rd crop	Biochemical	Total Chlorophyll mg/g	Thrips	Sucking guild	per sq cm leaf	0.502	*	positive	moderate
3rd crop	Biochemical	Total Chlorophyll mg/g	Whitefly	Sucking guild	per three leaves	0.27	ns	positive	weak
4th crop	Biochemical	Carbohydrate mg/g	Ant	Ant guild	per three leaves	-0.255	ns	negative	weak
4th crop	Biochemical	Carbohydrate mg/g	BSFB	Chewing guild	per plant	0.423	ns	positive	weak-to-moderate
4th crop	Biochemical	Carbohydrate mg/g	Epilachna beetle	Chewing guild	per three leaves	0.59	**	positive	moderate
4th crop	Biochemical	Carbohydrate mg/g	Flea beetle	Chewing guild	per three leaves	0.76	**	positive	strong
4th crop	Biochemical	Carbohydrate mg/g	Lady bird beetle	Predatory guild	per three leaves	-0.091	ns	negative	weak
4th crop	Biochemical	Carbohydrate mg/g	Spider	Predatory guild	per three leaves	-0.117	ns	negative	weak
4th crop	Biochemical	Carbohydrate mg/g	Aphid	Sucking guild	per sq cm leaf	-0.177	ns	negative	weak
4th crop	Biochemical	Carbohydrate mg/g	Jassid	Sucking guild	per three leaves	0.707	**	positive	strong
4th crop	Biochemical	Carbohydrate mg/g	Thrips	Sucking guild	per sq cm leaf	0.515	*	positive	moderate
4th crop	Biochemical	Carbohydrate mg/g	Whitefly	Sucking guild	per three leaves	0.044	ns	positive	weak
4th crop	Biochemical	Phenolics	Ant	Ant guild	per three leaves	0.376	ns	positive	weak-to-moderate
4th crop	Biochemical	Phenolics	BSFB	Chewing guild	per plant	-0.428	ns	negative	weak-to-moderate
4th crop	Biochemical	Phenolics	Epilachna beetle	Chewing guild	per three leaves	-0.076	ns	negative	weak
4th crop	Biochemical	Phenolics	Flea beetle	Chewing guild	per three leaves	-0.093	ns	negative	weak
4th crop	Biochemical	Phenolics	Lady bird beetle	Predatory guild	per three leaves	-0.636	**	negative	moderate
4th crop	Biochemical	Phenolics	Spider	Predatory guild	per three leaves	-0.037	ns	negative	weak
4th crop	Biochemical	Phenolics	Aphid	Sucking guild	per sq cm leaf	-0.348	ns	negative	weak-to-moderate
4th crop	Biochemical	Phenolics	Jassid	Sucking guild	per three leaves	-0.566	**	negative	moderate
4th crop	Biochemical	Phenolics	Thrips	Sucking guild	per sq cm leaf	-0.492	*	negative	weak-to-moderate
4th crop	Biochemical	Phenolics	Whitefly	Sucking guild	per three leaves	-0.236	ns	negative	weak
4th crop	Biochemical	Protein	Ant	Ant guild	per three leaves	-0.204	ns	negative	weak
4th crop	Biochemical	Protein	BSFB	Chewing guild	per plant	0.433	ns	positive	weak-to-moderate
4th crop	Biochemical	Protein	Epilachna beetle	Chewing guild	per three leaves	0.544	*	positive	moderate
4th crop	Biochemical	Protein	Flea beetle	Chewing guild	per three leaves	0.764	**	positive	strong
4th crop	Biochemical	Protein	Lady bird beetle	Predatory guild	per three leaves	-0.085	ns	negative	weak
4th crop	Biochemical	Protein	Spider	Predatory guild	per three leaves	-0.126	ns	negative	weak
4th crop	Biochemical	Protein	Aphid	Sucking guild	per sq cm leaf	-0.169	ns	negative	weak
4th crop	Biochemical	Protein	Jassid	Sucking guild	per three leaves	0.752	**	positive	strong
4th crop	Biochemical	Protein	Thrips	Sucking guild	per sq cm leaf	0.554	*	positive	moderate
4th crop	Biochemical	Protein	Whitefly	Sucking guild	per three leaves	0.061	ns	positive	weak
4th crop	Biochemical	Total Chlorophyll mg/g	Ant	Ant guild	per three leaves	-0.44	ns	negative	weak-to-moderate
4th crop	Biochemical	Total Chlorophyll mg/g	BSFB	Chewing guild	per plant	0.401	ns	positive	weak-to-moderate
4th crop	Biochemical	Total Chlorophyll mg/g	Epilachna beetle	Chewing guild	per three leaves	0.435	ns	positive	weak-to-moderate
4th crop	Biochemical	Total Chlorophyll mg/g	Flea beetle	Chewing guild	per three leaves	0.486	*	positive	weak-to-moderate
4th crop	Biochemical	Total Chlorophyll mg/g	Lady bird beetle	Predatory guild	per three leaves	0.133	ns	positive	weak
4th crop	Biochemical	Total Chlorophyll mg/g	Spider	Predatory guild	per three leaves	0.232	ns	positive	weak
4th crop	Biochemical	Total Chlorophyll mg/g	Aphid	Sucking guild	per sq cm leaf	0.108	ns	positive	weak
4th crop	Biochemical	Total Chlorophyll mg/g	Jassid	Sucking guild	per three leaves	0.591	**	positive	moderate
4th crop	Biochemical	Total Chlorophyll mg/g	Thrips	Sucking guild	per sq cm leaf	0.631	**	positive	moderate
4th crop	Biochemical	Total Chlorophyll mg/g	Whitefly	Sucking guild	per three leaves	0.312	ns	positive	weak-to-moderate
5th crop	Biochemical	Carbohydrate mg/g	Ant	Ant guild	per three leaves	-0.44	ns	negative	weak-to-moderate
5th crop	Biochemical	Carbohydrate mg/g	BSFB	Chewing guild	per plant	0.786	**	positive	strong
5th crop	Biochemical	Carbohydrate mg/g	Epilachna beetle	Chewing guild	per three leaves	0.891	**	positive	strong
5th crop	Biochemical	Carbohydrate mg/g	Flea beetle	Chewing guild	per three leaves	-0.228	ns	negative	weak
5th crop	Biochemical	Carbohydrate mg/g	Lady bird beetle	Predatory guild	per three leaves	0.083	ns	positive	weak
5th crop	Biochemical	Carbohydrate mg/g	Spider	Predatory guild	per three leaves	0.584	**	positive	moderate
5th crop	Biochemical	Carbohydrate mg/g	Aphid	Sucking guild	per sq cm leaf	0.457	*	positive	weak-to-moderate
5th crop	Biochemical	Carbohydrate mg/g	Jassid	Sucking guild	per three leaves	-0.177	ns	negative	weak
5th crop	Biochemical	Carbohydrate mg/g	Mealybug	Sucking guild	per three leaves	0.401	ns	positive	weak-to-moderate
5th crop	Biochemical	Carbohydrate mg/g	Thrips	Sucking guild	per sq cm leaf	-0.134	ns	negative	weak
5th crop	Biochemical	Carbohydrate mg/g	Whitefly	Sucking guild	per three leaves	-0.227	ns	negative	weak
5th crop	Biochemical	Phenolics	Ant	Ant guild	per three leaves	0.159	ns	positive	weak
5th crop	Biochemical	Phenolics	BSFB	Chewing guild	per plant	-0.347	ns	negative	weak-to-moderate
5th crop	Biochemical	Phenolics	Epilachna beetle	Chewing guild	per three leaves	-0.406	ns	negative	weak-to-moderate
5th crop	Biochemical	Phenolics	Flea beetle	Chewing guild	per three leaves	-0.602	**	negative	moderate
5th crop	Biochemical	Phenolics	Lady bird beetle	Predatory guild	per three leaves	-0.359	ns	negative	weak-to-moderate
5th crop	Biochemical	Phenolics	Spider	Predatory guild	per three leaves	-0.274	ns	negative	weak
5th crop	Biochemical	Phenolics	Aphid	Sucking guild	per sq cm leaf	-0.195	ns	negative	weak
5th crop	Biochemical	Phenolics	Jassid	Sucking guild	per three leaves	-0.696	**	negative	moderate
5th crop	Biochemical	Phenolics	Mealybug	Sucking guild	per three leaves	-0.01	ns	negative	weak
5th crop	Biochemical	Phenolics	Thrips	Sucking guild	per sq cm leaf	-0.544	*	negative	moderate
5th crop	Biochemical	Phenolics	Whitefly	Sucking guild	per three leaves	-0.326	ns	negative	weak-to-moderate
5th crop	Biochemical	Protein	Ant	Ant guild	per three leaves	-0.414	ns	negative	weak-to-moderate
5th crop	Biochemical	Protein	BSFB	Chewing guild	per plant	0.793	**	positive	strong
5th crop	Biochemical	Protein	Epilachna beetle	Chewing guild	per three leaves	0.889	**	positive	strong
5th crop	Biochemical	Protein	Flea beetle	Chewing guild	per three leaves	-0.218	ns	negative	weak
5th crop	Biochemical	Protein	Lady bird beetle	Predatory guild	per three leaves	0.041	ns	positive	weak
5th crop	Biochemical	Protein	Spider	Predatory guild	per three leaves	0.594	**	positive	moderate
5th crop	Biochemical	Protein	Aphid	Sucking guild	per sq cm leaf	0.431	ns	positive	weak-to-moderate
5th crop	Biochemical	Protein	Jassid	Sucking guild	per three leaves	-0.2	ns	negative	weak
5th crop	Biochemical	Protein	Mealybug	Sucking guild	per three leaves	0.42	ns	positive	weak-to-moderate
5th crop	Biochemical	Protein	Thrips	Sucking guild	per sq cm leaf	-0.15	ns	negative	weak
5th crop	Biochemical	Protein	Whitefly	Sucking guild	per three leaves	-0.232	ns	negative	weak
5th crop	Biochemical	Total Chlorophyll mg/g	Ant	Ant guild	per three leaves	-0.067	ns	negative	weak
5th crop	Biochemical	Total Chlorophyll mg/g	BSFB	Chewing guild	per plant	0.656	**	positive	moderate
5th crop	Biochemical	Total Chlorophyll mg/g	Epilachna beetle	Chewing guild	per three leaves	0.742	**	positive	strong
5th crop	Biochemical	Total Chlorophyll mg/g	Flea beetle	Chewing guild	per three leaves	0.202	ns	positive	weak
5th crop	Biochemical	Total Chlorophyll mg/g	Lady bird beetle	Predatory guild	per three leaves	0.181	ns	positive	weak
5th crop	Biochemical	Total Chlorophyll mg/g	Spider	Predatory guild	per three leaves	0.62	**	positive	moderate
5th crop	Biochemical	Total Chlorophyll mg/g	Aphid	Sucking guild	per sq cm leaf	0.15	ns	positive	weak
5th crop	Biochemical	Total Chlorophyll mg/g	Jassid	Sucking guild	per three leaves	0.158	ns	positive	weak
5th crop	Biochemical	Total Chlorophyll mg/g	Mealybug	Sucking guild	per three leaves	0.033	ns	positive	weak
5th crop	Biochemical	Total Chlorophyll mg/g	Thrips	Sucking guild	per sq cm leaf	0.245	ns	positive	weak
5th crop	Biochemical	Total Chlorophyll mg/g	Whitefly	Sucking guild	per three leaves	0.237	ns	positive	weak
6th crop	Biochemical	Carbohydrate mg/g	Ant	Ant guild	per three leaves	-0.038	ns	negative	weak
6th crop	Biochemical	Carbohydrate mg/g	BSFB	Chewing guild	per plant	0.591	**	positive	moderate
6th crop	Biochemical	Carbohydrate mg/g	Epilachna beetle	Chewing guild	per three leaves	-0.326	ns	negative	weak-to-moderate
6th crop	Biochemical	Carbohydrate mg/g	Flea beetle	Chewing guild	per three leaves	0.173	ns	positive	weak
6th crop	Biochemical	Carbohydrate mg/g	Lady bird beetle	Predatory guild	per three leaves	-0.07	ns	negative	weak
6th crop	Biochemical	Carbohydrate mg/g	Spider	Predatory guild	per three leaves	0.466	*	positive	weak-to-moderate
6th crop	Biochemical	Carbohydrate mg/g	Aphid	Sucking guild	per sq cm leaf	0.189	ns	positive	weak
6th crop	Biochemical	Carbohydrate mg/g	Jassid	Sucking guild	per three leaves	-0.261	ns	negative	weak
6th crop	Biochemical	Carbohydrate mg/g	Mealybug	Sucking guild	per three leaves	-0.041	ns	negative	weak
6th crop	Biochemical	Carbohydrate mg/g	Whitefly	Sucking guild	per three leaves	0.126	ns	positive	weak
6th crop	Biochemical	Phenolics	Ant	Ant guild	per three leaves	-0.547	*	negative	moderate
6th crop	Biochemical	Phenolics	BSFB	Chewing guild	per plant	-0.809	**	negative	strong
6th crop	Biochemical	Phenolics	Epilachna beetle	Chewing guild	per three leaves	-0.204	ns	negative	weak
6th crop	Biochemical	Phenolics	Flea beetle	Chewing guild	per three leaves	-0.417	ns	negative	weak-to-moderate
6th crop	Biochemical	Phenolics	Lady bird beetle	Predatory guild	per three leaves	-0.245	ns	negative	weak
6th crop	Biochemical	Phenolics	Spider	Predatory guild	per three leaves	-0.153	ns	negative	weak
6th crop	Biochemical	Phenolics	Aphid	Sucking guild	per sq cm leaf	-0.483	*	negative	weak-to-moderate
6th crop	Biochemical	Phenolics	Jassid	Sucking guild	per three leaves	-0.615	**	negative	moderate
6th crop	Biochemical	Phenolics	Mealybug	Sucking guild	per three leaves	-0.412	ns	negative	weak-to-moderate
6th crop	Biochemical	Phenolics	Whitefly	Sucking guild	per three leaves	0.043	ns	positive	weak
6th crop	Biochemical	Protein	Ant	Ant guild	per three leaves	-0.013	ns	negative	weak
6th crop	Biochemical	Protein	BSFB	Chewing guild	per plant	0.599	**	positive	moderate
6th crop	Biochemical	Protein	Epilachna beetle	Chewing guild	per three leaves	-0.283	ns	negative	weak
6th crop	Biochemical	Protein	Flea beetle	Chewing guild	per three leaves	0.186	ns	positive	weak
6th crop	Biochemical	Protein	Lady bird beetle	Predatory guild	per three leaves	-0.049	ns	negative	weak
6th crop	Biochemical	Protein	Spider	Predatory guild	per three leaves	0.447	*	positive	weak-to-moderate
6th crop	Biochemical	Protein	Aphid	Sucking guild	per sq cm leaf	0.146	ns	positive	weak
6th crop	Biochemical	Protein	Jassid	Sucking guild	per three leaves	-0.26	ns	negative	weak
6th crop	Biochemical	Protein	Mealybug	Sucking guild	per three leaves	-0.063	ns	negative	weak
6th crop	Biochemical	Protein	Whitefly	Sucking guild	per three leaves	0.164	ns	positive	weak
6th crop	Biochemical	Total Chlorophyll mg/g	Ant	Ant guild	per three leaves	0.322	ns	positive	weak-to-moderate
6th crop	Biochemical	Total Chlorophyll mg/g	BSFB	Chewing guild	per plant	0.762	**	positive	strong
6th crop	Biochemical	Total Chlorophyll mg/g	Epilachna beetle	Chewing guild	per three leaves	-0.087	ns	negative	weak
6th crop	Biochemical	Total Chlorophyll mg/g	Flea beetle	Chewing guild	per three leaves	0.48	*	positive	weak-to-moderate
6th crop	Biochemical	Total Chlorophyll mg/g	Lady bird beetle	Predatory guild	per three leaves	0.1	ns	positive	weak
6th crop	Biochemical	Total Chlorophyll mg/g	Spider	Predatory guild	per three leaves	0.257	ns	positive	weak
6th crop	Biochemical	Total Chlorophyll mg/g	Aphid	Sucking guild	per sq cm leaf	0.387	ns	positive	weak-to-moderate
6th crop	Biochemical	Total Chlorophyll mg/g	Jassid	Sucking guild	per three leaves	-0.443	ns	negative	weak-to-moderate
6th crop	Biochemical	Total Chlorophyll mg/g	Mealybug	Sucking guild	per three leaves	0.216	ns	positive	weak
6th crop	Biochemical	Total Chlorophyll mg/g	Whitefly	Sucking guild	per three leaves	0.191	ns	positive	weak
7th crop	Biochemical	Carbohydrate mg/g	Ant	Ant guild	per three leaves	-0.14	ns	negative	weak
7th crop	Biochemical	Carbohydrate mg/g	BSFB	Chewing guild	per plant	0.624	**	positive	moderate
7th crop	Biochemical	Carbohydrate mg/g	Epilachna beetle	Chewing guild	per three leaves	-0.368	ns	negative	weak-to-moderate
7th crop	Biochemical	Carbohydrate mg/g	Flea beetle	Chewing guild	per three leaves	-0.283	ns	negative	weak
7th crop	Biochemical	Carbohydrate mg/g	Lady bird beetle	Predatory guild	per three leaves	0.43	ns	positive	weak-to-moderate
7th crop	Biochemical	Carbohydrate mg/g	Spider	Predatory guild	per three leaves	-0.056	ns	negative	weak
7th crop	Biochemical	Carbohydrate mg/g	Aphid	Sucking guild	per sq cm leaf	0.393	ns	positive	weak-to-moderate
7th crop	Biochemical	Carbohydrate mg/g	Jassid	Sucking guild	per three leaves	-0.041	ns	negative	weak
7th crop	Biochemical	Carbohydrate mg/g	Mealybug	Sucking guild	per three leaves	0.151	ns	positive	weak
7th crop	Biochemical	Carbohydrate mg/g	Thrips	Sucking guild	per sq cm leaf	0.628	**	positive	moderate
7th crop	Biochemical	Carbohydrate mg/g	Whitefly	Sucking guild	per three leaves	0.436	ns	positive	weak-to-moderate
7th crop	Biochemical	Phenolics	Ant	Ant guild	per three leaves	0.213	ns	positive	weak
7th crop	Biochemical	Phenolics	BSFB	Chewing guild	per plant	-0.378	ns	negative	weak-to-moderate
7th crop	Biochemical	Phenolics	Epilachna beetle	Chewing guild	per three leaves	0.037	ns	positive	weak
7th crop	Biochemical	Phenolics	Flea beetle	Chewing guild	per three leaves	0.094	ns	positive	weak
7th crop	Biochemical	Phenolics	Lady bird beetle	Predatory guild	per three leaves	-0.292	ns	negative	weak
7th crop	Biochemical	Phenolics	Spider	Predatory guild	per three leaves	-0.132	ns	negative	weak
7th crop	Biochemical	Phenolics	Aphid	Sucking guild	per sq cm leaf	-0.614	**	negative	moderate
7th crop	Biochemical	Phenolics	Jassid	Sucking guild	per three leaves	-0.483	*	negative	weak-to-moderate
7th crop	Biochemical	Phenolics	Mealybug	Sucking guild	per three leaves	0.087	ns	positive	weak
7th crop	Biochemical	Phenolics	Thrips	Sucking guild	per sq cm leaf	-0.13	ns	negative	weak
7th crop	Biochemical	Phenolics	Whitefly	Sucking guild	per three leaves	-0.01	ns	negative	weak
7th crop	Biochemical	Protein	Ant	Ant guild	per three leaves	-0.161	ns	negative	weak
7th crop	Biochemical	Protein	BSFB	Chewing guild	per plant	0.668	**	positive	moderate
7th crop	Biochemical	Protein	Epilachna beetle	Chewing guild	per three leaves	-0.426	ns	negative	weak-to-moderate
7th crop	Biochemical	Protein	Flea beetle	Chewing guild	per three leaves	-0.348	ns	negative	weak-to-moderate
7th crop	Biochemical	Protein	Lady bird beetle	Predatory guild	per three leaves	0.383	ns	positive	weak-to-moderate
7th crop	Biochemical	Protein	Spider	Predatory guild	per three leaves	-0.088	ns	negative	weak
7th crop	Biochemical	Protein	Aphid	Sucking guild	per sq cm leaf	0.347	ns	positive	weak-to-moderate
7th crop	Biochemical	Protein	Jassid	Sucking guild	per three leaves	-0.077	ns	negative	weak
7th crop	Biochemical	Protein	Mealybug	Sucking guild	per three leaves	0.131	ns	positive	weak
7th crop	Biochemical	Protein	Thrips	Sucking guild	per sq cm leaf	0.618	**	positive	moderate
7th crop	Biochemical	Protein	Whitefly	Sucking guild	per three leaves	0.384	ns	positive	weak-to-moderate
7th crop	Biochemical	Total Chlorophyll mg/g	Ant	Ant guild	per three leaves	0.066	ns	positive	weak
7th crop	Biochemical	Total Chlorophyll mg/g	BSFB	Chewing guild	per plant	0.535	*	positive	moderate
7th crop	Biochemical	Total Chlorophyll mg/g	Epilachna beetle	Chewing guild	per three leaves	-0.35	ns	negative	weak-to-moderate
7th crop	Biochemical	Total Chlorophyll mg/g	Flea beetle	Chewing guild	per three leaves	-0.349	ns	negative	weak-to-moderate
7th crop	Biochemical	Total Chlorophyll mg/g	Lady bird beetle	Predatory guild	per three leaves	0.318	ns	positive	weak-to-moderate
7th crop	Biochemical	Total Chlorophyll mg/g	Spider	Predatory guild	per three leaves	-0.2	ns	negative	weak
7th crop	Biochemical	Total Chlorophyll mg/g	Aphid	Sucking guild	per sq cm leaf	0.538	*	positive	moderate
7th crop	Biochemical	Total Chlorophyll mg/g	Jassid	Sucking guild	per three leaves	-0.323	ns	negative	weak-to-moderate
7th crop	Biochemical	Total Chlorophyll mg/g	Mealybug	Sucking guild	per three leaves	-0.116	ns	negative	weak
7th crop	Biochemical	Total Chlorophyll mg/g	Thrips	Sucking guild	per sq cm leaf	0.359	ns	positive	weak-to-moderate
7th crop	Biochemical	Total Chlorophyll mg/g	Whitefly	Sucking guild	per three leaves	0.333	ns	positive	weak-to-moderate
8th crop	Biochemical	Carbohydrate mg/g	Ant	Ant guild	per three leaves	-0.107	ns	negative	weak
8th crop	Biochemical	Carbohydrate mg/g	BSFB	Chewing guild	per plant	0.879	**	positive	strong
8th crop	Biochemical	Carbohydrate mg/g	Epilachna beetle	Chewing guild	per three leaves	-0.041	ns	negative	weak
8th crop	Biochemical	Carbohydrate mg/g	Flea beetle	Chewing guild	per three leaves	0.455	*	positive	weak-to-moderate
8th crop	Biochemical	Carbohydrate mg/g	Lady bird beetle	Predatory guild	per three leaves	0.061	ns	positive	weak
8th crop	Biochemical	Carbohydrate mg/g	Spider	Predatory guild	per three leaves	0.426	ns	positive	weak-to-moderate
8th crop	Biochemical	Carbohydrate mg/g	Aphid	Sucking guild	per sq cm leaf	0.278	ns	positive	weak
8th crop	Biochemical	Carbohydrate mg/g	Jassid	Sucking guild	per three leaves	0.354	ns	positive	weak-to-moderate
8th crop	Biochemical	Carbohydrate mg/g	Mealybug	Sucking guild	per three leaves	-0.063	ns	negative	weak
8th crop	Biochemical	Carbohydrate mg/g	Thrips	Sucking guild	per sq cm leaf	0.418	ns	positive	weak-to-moderate
8th crop	Biochemical	Carbohydrate mg/g	Whitefly	Sucking guild	per three leaves	0.301	ns	positive	weak-to-moderate
8th crop	Biochemical	Phenolics	Ant	Ant guild	per three leaves	-0.183	ns	negative	weak
8th crop	Biochemical	Phenolics	BSFB	Chewing guild	per plant	-0.28	ns	negative	weak
8th crop	Biochemical	Phenolics	Epilachna beetle	Chewing guild	per three leaves	-0.689	**	negative	moderate
8th crop	Biochemical	Phenolics	Flea beetle	Chewing guild	per three leaves	-0.529	*	negative	moderate
8th crop	Biochemical	Phenolics	Lady bird beetle	Predatory guild	per three leaves	-0.447	*	negative	weak-to-moderate
8th crop	Biochemical	Phenolics	Spider	Predatory guild	per three leaves	-0.43	ns	negative	weak-to-moderate
8th crop	Biochemical	Phenolics	Aphid	Sucking guild	per sq cm leaf	-0.714	**	negative	strong
8th crop	Biochemical	Phenolics	Jassid	Sucking guild	per three leaves	-0.375	ns	negative	weak-to-moderate
8th crop	Biochemical	Phenolics	Mealybug	Sucking guild	per three leaves	-0.329	ns	negative	weak-to-moderate
8th crop	Biochemical	Phenolics	Thrips	Sucking guild	per sq cm leaf	-0.789	**	negative	strong
8th crop	Biochemical	Phenolics	Whitefly	Sucking guild	per three leaves	-0.785	**	negative	strong
8th crop	Biochemical	Protein	Ant	Ant guild	per three leaves	-0.125	ns	negative	weak
8th crop	Biochemical	Protein	BSFB	Chewing guild	per plant	0.879	**	positive	strong
8th crop	Biochemical	Protein	Epilachna beetle	Chewing guild	per three leaves	-0.062	ns	negative	weak
8th crop	Biochemical	Protein	Flea beetle	Chewing guild	per three leaves	0.466	*	positive	weak-to-moderate
8th crop	Biochemical	Protein	Lady bird beetle	Predatory guild	per three leaves	0.018	ns	positive	weak
8th crop	Biochemical	Protein	Spider	Predatory guild	per three leaves	0.431	ns	positive	weak-to-moderate
8th crop	Biochemical	Protein	Aphid	Sucking guild	per sq cm leaf	0.279	ns	positive	weak
8th crop	Biochemical	Protein	Jassid	Sucking guild	per three leaves	0.316	ns	positive	weak-to-moderate
8th crop	Biochemical	Protein	Mealybug	Sucking guild	per three leaves	-0.07	ns	negative	weak
8th crop	Biochemical	Protein	Thrips	Sucking guild	per sq cm leaf	0.414	ns	positive	weak-to-moderate
8th crop	Biochemical	Protein	Whitefly	Sucking guild	per three leaves	0.286	ns	positive	weak
8th crop	Biochemical	Total Chlorophyll mg/g	Ant	Ant guild	per three leaves	0.249	ns	positive	weak
8th crop	Biochemical	Total Chlorophyll mg/g	BSFB	Chewing guild	per plant	0.697	**	positive	moderate
8th crop	Biochemical	Total Chlorophyll mg/g	Epilachna beetle	Chewing guild	per three leaves	0.075	ns	positive	weak
8th crop	Biochemical	Total Chlorophyll mg/g	Flea beetle	Chewing guild	per three leaves	0.363	ns	positive	weak-to-moderate
8th crop	Biochemical	Total Chlorophyll mg/g	Lady bird beetle	Predatory guild	per three leaves	0.068	ns	positive	weak
8th crop	Biochemical	Total Chlorophyll mg/g	Spider	Predatory guild	per three leaves	0.221	ns	positive	weak
8th crop	Biochemical	Total Chlorophyll mg/g	Aphid	Sucking guild	per sq cm leaf	0.509	*	positive	moderate
8th crop	Biochemical	Total Chlorophyll mg/g	Jassid	Sucking guild	per three leaves	0.215	ns	positive	weak
8th crop	Biochemical	Total Chlorophyll mg/g	Mealybug	Sucking guild	per three leaves	0.15	ns	positive	weak
8th crop	Biochemical	Total Chlorophyll mg/g	Thrips	Sucking guild	per sq cm leaf	0.526	*	positive	moderate
8th crop	Biochemical	Total Chlorophyll mg/g	Whitefly	Sucking guild	per three leaves	0.64	**	positive	moderate
9th crop	Biochemical	Carbohydrate mg/g	Ant	Ant guild	per three leaves	-0.705	**	negative	strong
9th crop	Biochemical	Carbohydrate mg/g	BSFB	Chewing guild	per plant	0.818	**	positive	strong
9th crop	Biochemical	Carbohydrate mg/g	Epilachna beetle	Chewing guild	per three leaves	-0.299	ns	negative	weak
9th crop	Biochemical	Carbohydrate mg/g	Flea beetle	Chewing guild	per three leaves	0.053	ns	positive	weak
9th crop	Biochemical	Carbohydrate mg/g	Leaf roller	Chewing guild	per plant	-0.268	ns	negative	weak
9th crop	Biochemical	Carbohydrate mg/g	Lady bird beetle	Predatory guild	per three leaves	0.047	ns	positive	weak
9th crop	Biochemical	Carbohydrate mg/g	Spider	Predatory guild	per three leaves	-0.109	ns	negative	weak
9th crop	Biochemical	Carbohydrate mg/g	Aphid	Sucking guild	per sq cm leaf	0.54	*	positive	moderate
9th crop	Biochemical	Carbohydrate mg/g	Jassid	Sucking guild	per three leaves	0.519	*	positive	moderate
9th crop	Biochemical	Carbohydrate mg/g	Thrips	Sucking guild	per sq cm leaf	0.686	**	positive	moderate
9th crop	Biochemical	Carbohydrate mg/g	Whitefly	Sucking guild	per three leaves	0.373	ns	positive	weak-to-moderate
9th crop	Biochemical	Phenolics	Ant	Ant guild	per three leaves	0.142	ns	positive	weak
9th crop	Biochemical	Phenolics	BSFB	Chewing guild	per plant	-0.15	ns	negative	weak
9th crop	Biochemical	Phenolics	Epilachna beetle	Chewing guild	per three leaves	-0.129	ns	negative	weak
9th crop	Biochemical	Phenolics	Flea beetle	Chewing guild	per three leaves	0.365	ns	positive	weak-to-moderate
9th crop	Biochemical	Phenolics	Leaf roller	Chewing guild	per plant	-0.126	ns	negative	weak
9th crop	Biochemical	Phenolics	Lady bird beetle	Predatory guild	per three leaves	-0.406	ns	negative	weak-to-moderate
9th crop	Biochemical	Phenolics	Spider	Predatory guild	per three leaves	-0.149	ns	negative	weak
9th crop	Biochemical	Phenolics	Aphid	Sucking guild	per sq cm leaf	-0.485	*	negative	weak-to-moderate
9th crop	Biochemical	Phenolics	Jassid	Sucking guild	per three leaves	-0.531	*	negative	moderate
9th crop	Biochemical	Phenolics	Thrips	Sucking guild	per sq cm leaf	-0.254	ns	negative	weak
9th crop	Biochemical	Phenolics	Whitefly	Sucking guild	per three leaves	-0.656	**	negative	moderate
9th crop	Biochemical	Protein	Ant	Ant guild	per three leaves	-0.712	**	negative	strong
9th crop	Biochemical	Protein	BSFB	Chewing guild	per plant	0.817	**	positive	strong
9th crop	Biochemical	Protein	Epilachna beetle	Chewing guild	per three leaves	-0.274	ns	negative	weak
9th crop	Biochemical	Protein	Flea beetle	Chewing guild	per three leaves	0.093	ns	positive	weak
9th crop	Biochemical	Protein	Leaf roller	Chewing guild	per plant	-0.249	ns	negative	weak
9th crop	Biochemical	Protein	Lady bird beetle	Predatory guild	per three leaves	0.108	ns	positive	weak
9th crop	Biochemical	Protein	Spider	Predatory guild	per three leaves	-0.091	ns	negative	weak
9th crop	Biochemical	Protein	Aphid	Sucking guild	per sq cm leaf	0.537	*	positive	moderate
9th crop	Biochemical	Protein	Jassid	Sucking guild	per three leaves	0.506	*	positive	moderate
9th crop	Biochemical	Protein	Thrips	Sucking guild	per sq cm leaf	0.664	**	positive	moderate
9th crop	Biochemical	Protein	Whitefly	Sucking guild	per three leaves	0.42	ns	positive	weak-to-moderate
9th crop	Biochemical	Total Chlorophyll mg/g	Ant	Ant guild	per three leaves	-0.298	ns	negative	weak
9th crop	Biochemical	Total Chlorophyll mg/g	BSFB	Chewing guild	per plant	0.61	**	positive	moderate
9th crop	Biochemical	Total Chlorophyll mg/g	Epilachna beetle	Chewing guild	per three leaves	-0.185	ns	negative	weak
9th crop	Biochemical	Total Chlorophyll mg/g	Flea beetle	Chewing guild	per three leaves	-0.182	ns	negative	weak
9th crop	Biochemical	Total Chlorophyll mg/g	Leaf roller	Chewing guild	per plant	0.142	ns	positive	weak
9th crop	Biochemical	Total Chlorophyll mg/g	Lady bird beetle	Predatory guild	per three leaves	0.312	ns	positive	weak-to-moderate
9th crop	Biochemical	Total Chlorophyll mg/g	Spider	Predatory guild	per three leaves	0.179	ns	positive	weak
9th crop	Biochemical	Total Chlorophyll mg/g	Aphid	Sucking guild	per sq cm leaf	0.67	**	positive	moderate
9th crop	Biochemical	Total Chlorophyll mg/g	Jassid	Sucking guild	per three leaves	0.667	**	positive	moderate
9th crop	Biochemical	Total Chlorophyll mg/g	Thrips	Sucking guild	per sq cm leaf	0.569	**	positive	moderate
9th crop	Biochemical	Total Chlorophyll mg/g	Whitefly	Sucking guild	per three leaves	0.715	**	positive	strong
10th crop	Biochemical	Carbohydrate mg/g	Ant	Ant guild	per three leaves	-0.313	ns	negative	weak-to-moderate
10th crop	Biochemical	Carbohydrate mg/g	BSFB	Chewing guild	per plant	0.901	**	positive	strong
10th crop	Biochemical	Carbohydrate mg/g	Epilachna beetle	Chewing guild	per three leaves	0.272	ns	positive	weak
10th crop	Biochemical	Carbohydrate mg/g	Flea beetle	Chewing guild	per three leaves	0.566	**	positive	moderate
10th crop	Biochemical	Carbohydrate mg/g	Lady bird beetle	Predatory guild	per three leaves	0.381	ns	positive	weak-to-moderate
10th crop	Biochemical	Carbohydrate mg/g	Spider	Predatory guild	per three leaves	0.315	ns	positive	weak-to-moderate
10th crop	Biochemical	Carbohydrate mg/g	Aphid	Sucking guild	per sq cm leaf	-0.187	ns	negative	weak
10th crop	Biochemical	Carbohydrate mg/g	Jassid	Sucking guild	per three leaves	0.777	**	positive	strong
10th crop	Biochemical	Carbohydrate mg/g	Thrips	Sucking guild	per sq cm leaf	0.725	**	positive	strong
10th crop	Biochemical	Carbohydrate mg/g	Whitefly	Sucking guild	per three leaves	0.595	**	positive	moderate
10th crop	Biochemical	Phenolics	Ant	Ant guild	per three leaves	0.22	ns	positive	weak
10th crop	Biochemical	Phenolics	BSFB	Chewing guild	per plant	-0.334	ns	negative	weak-to-moderate
10th crop	Biochemical	Phenolics	Epilachna beetle	Chewing guild	per three leaves	-0.222	ns	negative	weak
10th crop	Biochemical	Phenolics	Flea beetle	Chewing guild	per three leaves	-0.284	ns	negative	weak
10th crop	Biochemical	Phenolics	Lady bird beetle	Predatory guild	per three leaves	-0.394	ns	negative	weak-to-moderate
10th crop	Biochemical	Phenolics	Spider	Predatory guild	per three leaves	-0.344	ns	negative	weak-to-moderate
10th crop	Biochemical	Phenolics	Aphid	Sucking guild	per sq cm leaf	-0.426	ns	negative	weak-to-moderate
10th crop	Biochemical	Phenolics	Jassid	Sucking guild	per three leaves	-0.611	**	negative	moderate
10th crop	Biochemical	Phenolics	Thrips	Sucking guild	per sq cm leaf	-0.426	ns	negative	weak-to-moderate
10th crop	Biochemical	Phenolics	Whitefly	Sucking guild	per three leaves	-0.481	*	negative	weak-to-moderate
10th crop	Biochemical	Protein	Ant	Ant guild	per three leaves	-0.311	ns	negative	weak-to-moderate
10th crop	Biochemical	Protein	BSFB	Chewing guild	per plant	0.888	**	positive	strong
10th crop	Biochemical	Protein	Epilachna beetle	Chewing guild	per three leaves	0.253	ns	positive	weak
10th crop	Biochemical	Protein	Flea beetle	Chewing guild	per three leaves	0.572	**	positive	moderate
10th crop	Biochemical	Protein	Lady bird beetle	Predatory guild	per three leaves	0.281	ns	positive	weak
10th crop	Biochemical	Protein	Spider	Predatory guild	per three leaves	0.322	ns	positive	weak-to-moderate
10th crop	Biochemical	Protein	Aphid	Sucking guild	per sq cm leaf	-0.161	ns	negative	weak
10th crop	Biochemical	Protein	Jassid	Sucking guild	per three leaves	0.758	**	positive	strong
10th crop	Biochemical	Protein	Thrips	Sucking guild	per sq cm leaf	0.725	**	positive	strong
10th crop	Biochemical	Protein	Whitefly	Sucking guild	per three leaves	0.599	**	positive	moderate
10th crop	Biochemical	Total Chlorophyll mg/g	Ant	Ant guild	per three leaves	-0.189	ns	negative	weak
10th crop	Biochemical	Total Chlorophyll mg/g	BSFB	Chewing guild	per plant	0.768	**	positive	strong
10th crop	Biochemical	Total Chlorophyll mg/g	Epilachna beetle	Chewing guild	per three leaves	0.312	ns	positive	weak-to-moderate
10th crop	Biochemical	Total Chlorophyll mg/g	Flea beetle	Chewing guild	per three leaves	0.474	*	positive	weak-to-moderate
10th crop	Biochemical	Total Chlorophyll mg/g	Lady bird beetle	Predatory guild	per three leaves	0.611	**	positive	moderate
10th crop	Biochemical	Total Chlorophyll mg/g	Spider	Predatory guild	per three leaves	0.281	ns	positive	weak
10th crop	Biochemical	Total Chlorophyll mg/g	Aphid	Sucking guild	per sq cm leaf	0.074	ns	positive	weak
10th crop	Biochemical	Total Chlorophyll mg/g	Jassid	Sucking guild	per three leaves	0.722	**	positive	strong
10th crop	Biochemical	Total Chlorophyll mg/g	Thrips	Sucking guild	per sq cm leaf	0.733	**	positive	strong
10th crop	Biochemical	Total Chlorophyll mg/g	Whitefly	Sucking guild	per three leaves	0.661	**	positive	moderate
11th crop	Biochemical	Carbohydrate mg/g	Ant	Ant guild	per three leaves	-0.431	ns	negative	weak-to-moderate
11th crop	Biochemical	Carbohydrate mg/g	BSFB	Chewing guild	per plant	0.774	**	positive	strong
11th crop	Biochemical	Carbohydrate mg/g	Epilachna beetle	Chewing guild	per three leaves	0.899	**	positive	strong
11th crop	Biochemical	Carbohydrate mg/g	Flea beetle	Chewing guild	per three leaves	-0.184	ns	negative	weak
11th crop	Biochemical	Carbohydrate mg/g	Lady bird beetle	Predatory guild	per three leaves	-0.255	ns	negative	weak
11th crop	Biochemical	Carbohydrate mg/g	Spider	Predatory guild	per three leaves	0.702	**	positive	strong
11th crop	Biochemical	Carbohydrate mg/g	Aphid	Sucking guild	per sq cm leaf	0.397	ns	positive	weak-to-moderate
11th crop	Biochemical	Carbohydrate mg/g	Jassid	Sucking guild	per three leaves	-0.178	ns	negative	weak
11th crop	Biochemical	Carbohydrate mg/g	Mealybug	Sucking guild	per three leaves	0.384	ns	positive	weak-to-moderate
11th crop	Biochemical	Carbohydrate mg/g	Thrips	Sucking guild	per sq cm leaf	-0.089	ns	negative	weak
11th crop	Biochemical	Carbohydrate mg/g	Whitefly	Sucking guild	per three leaves	-0.366	ns	negative	weak-to-moderate
11th crop	Biochemical	Phenolics	Ant	Ant guild	per three leaves	0.15	ns	positive	weak
11th crop	Biochemical	Phenolics	BSFB	Chewing guild	per plant	-0.408	ns	negative	weak-to-moderate
11th crop	Biochemical	Phenolics	Epilachna beetle	Chewing guild	per three leaves	-0.429	ns	negative	weak-to-moderate
11th crop	Biochemical	Phenolics	Flea beetle	Chewing guild	per three leaves	-0.439	ns	negative	weak-to-moderate
11th crop	Biochemical	Phenolics	Lady bird beetle	Predatory guild	per three leaves	-0.027	ns	negative	weak
11th crop	Biochemical	Phenolics	Spider	Predatory guild	per three leaves	-0.249	ns	negative	weak
11th crop	Biochemical	Phenolics	Aphid	Sucking guild	per sq cm leaf	-0.305	ns	negative	weak-to-moderate
11th crop	Biochemical	Phenolics	Jassid	Sucking guild	per three leaves	-0.614	**	negative	moderate
11th crop	Biochemical	Phenolics	Mealybug	Sucking guild	per three leaves	-0.066	ns	negative	weak
11th crop	Biochemical	Phenolics	Thrips	Sucking guild	per sq cm leaf	-0.645	**	negative	moderate
11th crop	Biochemical	Phenolics	Whitefly	Sucking guild	per three leaves	-0.165	ns	negative	weak
11th crop	Biochemical	Protein	Ant	Ant guild	per three leaves	-0.45	*	negative	weak-to-moderate
11th crop	Biochemical	Protein	BSFB	Chewing guild	per plant	0.793	**	positive	strong
11th crop	Biochemical	Protein	Epilachna beetle	Chewing guild	per three leaves	0.898	**	positive	strong
11th crop	Biochemical	Protein	Flea beetle	Chewing guild	per three leaves	-0.196	ns	negative	weak
11th crop	Biochemical	Protein	Lady bird beetle	Predatory guild	per three leaves	-0.23	ns	negative	weak
11th crop	Biochemical	Protein	Spider	Predatory guild	per three leaves	0.678	**	positive	moderate
11th crop	Biochemical	Protein	Aphid	Sucking guild	per sq cm leaf	0.406	ns	positive	weak-to-moderate
11th crop	Biochemical	Protein	Jassid	Sucking guild	per three leaves	-0.176	ns	negative	weak
11th crop	Biochemical	Protein	Mealybug	Sucking guild	per three leaves	0.415	ns	positive	weak-to-moderate
11th crop	Biochemical	Protein	Thrips	Sucking guild	per sq cm leaf	-0.097	ns	negative	weak
11th crop	Biochemical	Protein	Whitefly	Sucking guild	per three leaves	-0.35	ns	negative	weak-to-moderate
11th crop	Biochemical	Total Chlorophyll mg/g	Ant	Ant guild	per three leaves	-0.115	ns	negative	weak
11th crop	Biochemical	Total Chlorophyll mg/g	BSFB	Chewing guild	per plant	0.63	**	positive	moderate
11th crop	Biochemical	Total Chlorophyll mg/g	Epilachna beetle	Chewing guild	per three leaves	0.673	**	positive	moderate
11th crop	Biochemical	Total Chlorophyll mg/g	Flea beetle	Chewing guild	per three leaves	0.07	ns	positive	weak
11th crop	Biochemical	Total Chlorophyll mg/g	Lady bird beetle	Predatory guild	per three leaves	-0.083	ns	negative	weak
11th crop	Biochemical	Total Chlorophyll mg/g	Spider	Predatory guild	per three leaves	0.671	**	positive	moderate
11th crop	Biochemical	Total Chlorophyll mg/g	Aphid	Sucking guild	per sq cm leaf	0.501	*	positive	moderate
11th crop	Biochemical	Total Chlorophyll mg/g	Jassid	Sucking guild	per three leaves	0.135	ns	positive	weak
11th crop	Biochemical	Total Chlorophyll mg/g	Mealybug	Sucking guild	per three leaves	-0.095	ns	negative	weak
11th crop	Biochemical	Total Chlorophyll mg/g	Thrips	Sucking guild	per sq cm leaf	0.307	ns	positive	weak-to-moderate
11th crop	Biochemical	Total Chlorophyll mg/g	Whitefly	Sucking guild	per three leaves	-0.012	ns	negative	weak
1st crop	Physico-morphic	Fruit girth	Ant	Ant guild	per three leaves	0.554	*	positive	moderate
1st crop	Physico-morphic	Fruit girth	BSFB	Chewing guild	per plant	0.235	ns	positive	weak
1st crop	Physico-morphic	Fruit girth	Epilachna beetle	Chewing guild	per three leaves	-0.33	ns	negative	weak-to-moderate
1st crop	Physico-morphic	Fruit girth	Flea beetle	Chewing guild	per three leaves	0.144	ns	positive	weak
1st crop	Physico-morphic	Fruit girth	Leaf roller	Chewing guild	per plant	0.438	ns	positive	weak-to-moderate
1st crop	Physico-morphic	Fruit girth	Lady bird beetle	Predatory guild	per three leaves	0.244	ns	positive	weak
1st crop	Physico-morphic	Fruit girth	Spider	Predatory guild	per three leaves	0.684	**	positive	moderate
1st crop	Physico-morphic	Fruit girth	Aphid	Sucking guild	per sq cm leaf	0.508	*	positive	moderate
1st crop	Physico-morphic	Fruit girth	Jassid	Sucking guild	per three leaves	0.543	*	positive	moderate
1st crop	Physico-morphic	Fruit girth	Mealybug	Sucking guild	per three leaves	0.548	*	positive	moderate
1st crop	Physico-morphic	Fruit girth	Whitefly	Sucking guild	per three leaves	0.01	ns	positive	weak
1st crop	Physico-morphic	Fruit length	Ant	Ant guild	per three leaves	0.445	*	positive	weak-to-moderate
1st crop	Physico-morphic	Fruit length	BSFB	Chewing guild	per plant	0.126	ns	positive	weak
1st crop	Physico-morphic	Fruit length	Epilachna beetle	Chewing guild	per three leaves	-0.307	ns	negative	weak-to-moderate
1st crop	Physico-morphic	Fruit length	Flea beetle	Chewing guild	per three leaves	0.071	ns	positive	weak
1st crop	Physico-morphic	Fruit length	Leaf roller	Chewing guild	per plant	0.341	ns	positive	weak-to-moderate
1st crop	Physico-morphic	Fruit length	Lady bird beetle	Predatory guild	per three leaves	0.237	ns	positive	weak
1st crop	Physico-morphic	Fruit length	Spider	Predatory guild	per three leaves	0.59	**	positive	moderate
1st crop	Physico-morphic	Fruit length	Aphid	Sucking guild	per sq cm leaf	0.521	*	positive	moderate
1st crop	Physico-morphic	Fruit length	Jassid	Sucking guild	per three leaves	0.418	ns	positive	weak-to-moderate
1st crop	Physico-morphic	Fruit length	Mealybug	Sucking guild	per three leaves	0.54	*	positive	moderate
1st crop	Physico-morphic	Fruit length	Whitefly	Sucking guild	per three leaves	-0.041	ns	negative	weak
1st crop	Physico-morphic	Internode length	Ant	Ant guild	per three leaves	0.147	ns	positive	weak
1st crop	Physico-morphic	Internode length	BSFB	Chewing guild	per plant	0.006	ns	positive	weak
1st crop	Physico-morphic	Internode length	Epilachna beetle	Chewing guild	per three leaves	-0.12	ns	negative	weak
1st crop	Physico-morphic	Internode length	Flea beetle	Chewing guild	per three leaves	-0.017	ns	negative	weak
1st crop	Physico-morphic	Internode length	Leaf roller	Chewing guild	per plant	0.16	ns	positive	weak
1st crop	Physico-morphic	Internode length	Lady bird beetle	Predatory guild	per three leaves	0.398	ns	positive	weak-to-moderate
1st crop	Physico-morphic	Internode length	Spider	Predatory guild	per three leaves	0.423	ns	positive	weak-to-moderate
1st crop	Physico-morphic	Internode length	Aphid	Sucking guild	per sq cm leaf	0.316	ns	positive	weak-to-moderate
1st crop	Physico-morphic	Internode length	Jassid	Sucking guild	per three leaves	0.07	ns	positive	weak
1st crop	Physico-morphic	Internode length	Mealybug	Sucking guild	per three leaves	0.392	ns	positive	weak-to-moderate
1st crop	Physico-morphic	Internode length	Whitefly	Sucking guild	per three leaves	-0.094	ns	negative	weak
1st crop	Physico-morphic	Leaf area	Ant	Ant guild	per three leaves	-0.768	**	negative	strong
1st crop	Physico-morphic	Leaf area	BSFB	Chewing guild	per plant	-0.557	*	negative	moderate
1st crop	Physico-morphic	Leaf area	Epilachna beetle	Chewing guild	per three leaves	0.346	ns	positive	weak-to-moderate
1st crop	Physico-morphic	Leaf area	Flea beetle	Chewing guild	per three leaves	-0.41	ns	negative	weak-to-moderate
1st crop	Physico-morphic	Leaf area	Leaf roller	Chewing guild	per plant	-0.662	**	negative	moderate
1st crop	Physico-morphic	Leaf area	Lady bird beetle	Predatory guild	per three leaves	0.172	ns	positive	weak
1st crop	Physico-morphic	Leaf area	Spider	Predatory guild	per three leaves	-0.538	*	negative	moderate
1st crop	Physico-morphic	Leaf area	Aphid	Sucking guild	per sq cm leaf	-0.207	ns	negative	weak
1st crop	Physico-morphic	Leaf area	Jassid	Sucking guild	per three leaves	-0.928	**	negative	strong
1st crop	Physico-morphic	Leaf area	Mealybug	Sucking guild	per three leaves	-0.427	ns	negative	weak-to-moderate
1st crop	Physico-morphic	Leaf area	Whitefly	Sucking guild	per three leaves	-0.177	ns	negative	weak
1st crop	Physico-morphic	Leaf thickness	Ant	Ant guild	per three leaves	0.552	*	positive	moderate
1st crop	Physico-morphic	Leaf thickness	BSFB	Chewing guild	per plant	0.124	ns	positive	weak
1st crop	Physico-morphic	Leaf thickness	Epilachna beetle	Chewing guild	per three leaves	-0.371	ns	negative	weak-to-moderate
1st crop	Physico-morphic	Leaf thickness	Flea beetle	Chewing guild	per three leaves	0.108	ns	positive	weak
1st crop	Physico-morphic	Leaf thickness	Leaf roller	Chewing guild	per plant	0.439	ns	positive	weak-to-moderate
1st crop	Physico-morphic	Leaf thickness	Lady bird beetle	Predatory guild	per three leaves	0.262	ns	positive	weak
1st crop	Physico-morphic	Leaf thickness	Spider	Predatory guild	per three leaves	0.663	**	positive	moderate
1st crop	Physico-morphic	Leaf thickness	Aphid	Sucking guild	per sq cm leaf	0.501	*	positive	moderate
1st crop	Physico-morphic	Leaf thickness	Jassid	Sucking guild	per three leaves	0.498	*	positive	weak-to-moderate
1st crop	Physico-morphic	Leaf thickness	Mealybug	Sucking guild	per three leaves	0.583	**	positive	moderate
1st crop	Physico-morphic	Leaf thickness	Whitefly	Sucking guild	per three leaves	0.013	ns	positive	weak
1st crop	Physico-morphic	Pericarp	Ant	Ant guild	per three leaves	0.678	**	positive	moderate
1st crop	Physico-morphic	Pericarp	BSFB	Chewing guild	per plant	0.361	ns	positive	weak-to-moderate
1st crop	Physico-morphic	Pericarp	Epilachna beetle	Chewing guild	per three leaves	-0.372	ns	negative	weak-to-moderate
1st crop	Physico-morphic	Pericarp	Flea beetle	Chewing guild	per three leaves	0.256	ns	positive	weak
1st crop	Physico-morphic	Pericarp	Leaf roller	Chewing guild	per plant	0.558	*	positive	moderate
1st crop	Physico-morphic	Pericarp	Lady bird beetle	Predatory guild	per three leaves	0.16	ns	positive	weak
1st crop	Physico-morphic	Pericarp	Spider	Predatory guild	per three leaves	0.724	**	positive	strong
1st crop	Physico-morphic	Pericarp	Aphid	Sucking guild	per sq cm leaf	0.495	*	positive	weak-to-moderate
1st crop	Physico-morphic	Pericarp	Jassid	Sucking guild	per three leaves	0.72	**	positive	strong
1st crop	Physico-morphic	Pericarp	Mealybug	Sucking guild	per three leaves	0.615	**	positive	moderate
1st crop	Physico-morphic	Pericarp	Whitefly	Sucking guild	per three leaves	0.044	ns	positive	weak
1st crop	Physico-morphic	Plant height	Ant	Ant guild	per three leaves	0.74	**	positive	strong
1st crop	Physico-morphic	Plant height	BSFB	Chewing guild	per plant	0.457	*	positive	weak-to-moderate
1st crop	Physico-morphic	Plant height	Epilachna beetle	Chewing guild	per three leaves	-0.378	ns	negative	weak-to-moderate
1st crop	Physico-morphic	Plant height	Flea beetle	Chewing guild	per three leaves	0.352	ns	positive	weak-to-moderate
1st crop	Physico-morphic	Plant height	Leaf roller	Chewing guild	per plant	0.645	**	positive	moderate
1st crop	Physico-morphic	Plant height	Lady bird beetle	Predatory guild	per three leaves	0.05	ns	positive	weak
1st crop	Physico-morphic	Plant height	Spider	Predatory guild	per three leaves	0.706	**	positive	strong
1st crop	Physico-morphic	Plant height	Aphid	Sucking guild	per sq cm leaf	0.432	ns	positive	weak-to-moderate
1st crop	Physico-morphic	Plant height	Jassid	Sucking guild	per three leaves	0.833	**	positive	strong
1st crop	Physico-morphic	Plant height	Mealybug	Sucking guild	per three leaves	0.579	**	positive	moderate
1st crop	Physico-morphic	Plant height	Whitefly	Sucking guild	per three leaves	0.116	ns	positive	weak
1st crop	Physico-morphic	Trichome density	Ant	Ant guild	per three leaves	0.216	ns	positive	weak
1st crop	Physico-morphic	Trichome density	BSFB	Chewing guild	per plant	-0.013	ns	negative	weak
1st crop	Physico-morphic	Trichome density	Epilachna beetle	Chewing guild	per three leaves	-0.18	ns	negative	weak
1st crop	Physico-morphic	Trichome density	Flea beetle	Chewing guild	per three leaves	-0.033	ns	negative	weak
1st crop	Physico-morphic	Trichome density	Leaf roller	Chewing guild	per plant	0.192	ns	positive	weak
1st crop	Physico-morphic	Trichome density	Lady bird beetle	Predatory guild	per three leaves	0.358	ns	positive	weak-to-moderate
1st crop	Physico-morphic	Trichome density	Spider	Predatory guild	per three leaves	0.501	*	positive	moderate
1st crop	Physico-morphic	Trichome density	Aphid	Sucking guild	per sq cm leaf	-0.509	*	negative	moderate
1st crop	Physico-morphic	Trichome density	Jassid	Sucking guild	per three leaves	0.14	ns	positive	weak
1st crop	Physico-morphic	Trichome density	Mealybug	Sucking guild	per three leaves	0.487	*	positive	weak-to-moderate
1st crop	Physico-morphic	Trichome density	Whitefly	Sucking guild	per three leaves	-0.109	ns	negative	weak
1st crop	Physico-morphic	Upper girth	Ant	Ant guild	per three leaves	-0.745	**	negative	strong
1st crop	Physico-morphic	Upper girth	BSFB	Chewing guild	per plant	-0.219	ns	negative	weak
1st crop	Physico-morphic	Upper girth	Epilachna beetle	Chewing guild	per three leaves	0.196	ns	positive	weak
1st crop	Physico-morphic	Upper girth	Flea beetle	Chewing guild	per three leaves	-0.014	ns	negative	weak
1st crop	Physico-morphic	Upper girth	Leaf roller	Chewing guild	per plant	-0.374	ns	negative	weak-to-moderate
1st crop	Physico-morphic	Upper girth	Lady bird beetle	Predatory guild	per three leaves	-0.091	ns	negative	weak
1st crop	Physico-morphic	Upper girth	Spider	Predatory guild	per three leaves	-0.671	**	negative	moderate
1st crop	Physico-morphic	Upper girth	Aphid	Sucking guild	per sq cm leaf	-0.306	ns	negative	weak-to-moderate
1st crop	Physico-morphic	Upper girth	Jassid	Sucking guild	per three leaves	-0.717	**	negative	strong
1st crop	Physico-morphic	Upper girth	Mealybug	Sucking guild	per three leaves	-0.437	ns	negative	weak-to-moderate
1st crop	Physico-morphic	Upper girth	Whitefly	Sucking guild	per three leaves	-0.044	ns	negative	weak
2nd crop	Physico-morphic	Fruit girth	Ant	Ant guild	per three leaves	-0.131	ns	negative	weak
2nd crop	Physico-morphic	Fruit girth	BSFB	Chewing guild	per plant	0.485	*	positive	weak-to-moderate
2nd crop	Physico-morphic	Fruit girth	Epilachna beetle	Chewing guild	per three leaves	0.804	**	positive	strong
2nd crop	Physico-morphic	Fruit girth	Flea beetle	Chewing guild	per three leaves	-0.345	ns	negative	weak-to-moderate
2nd crop	Physico-morphic	Fruit girth	Leaf roller	Chewing guild	per plant	0.251	ns	positive	weak
2nd crop	Physico-morphic	Fruit girth	Spodoptera sp.	Chewing guild	per plant	0.412	ns	positive	weak-to-moderate
2nd crop	Physico-morphic	Fruit girth	Lady bird beetle	Predatory guild	per three leaves	0.326	ns	positive	weak-to-moderate
2nd crop	Physico-morphic	Fruit girth	Spider	Predatory guild	per three leaves	0.789	**	positive	strong
2nd crop	Physico-morphic	Fruit girth	Aphid	Sucking guild	per sq cm leaf	0.381	ns	positive	weak-to-moderate
2nd crop	Physico-morphic	Fruit girth	Jassid	Sucking guild	per three leaves	0.72	**	positive	strong
2nd crop	Physico-morphic	Fruit girth	Mealybug	Sucking guild	per three leaves	0.713	**	positive	strong
2nd crop	Physico-morphic	Fruit girth	Whitefly	Sucking guild	per three leaves	0.44	ns	positive	weak-to-moderate
2nd crop	Physico-morphic	Fruit length	Ant	Ant guild	per three leaves	-0.112	ns	negative	weak
2nd crop	Physico-morphic	Fruit length	BSFB	Chewing guild	per plant	0.461	*	positive	weak-to-moderate
2nd crop	Physico-morphic	Fruit length	Epilachna beetle	Chewing guild	per three leaves	0.788	**	positive	strong
2nd crop	Physico-morphic	Fruit length	Flea beetle	Chewing guild	per three leaves	-0.339	ns	negative	weak-to-moderate
2nd crop	Physico-morphic	Fruit length	Leaf roller	Chewing guild	per plant	0.187	ns	positive	weak
2nd crop	Physico-morphic	Fruit length	Spodoptera sp.	Chewing guild	per plant	0.401	ns	positive	weak-to-moderate
2nd crop	Physico-morphic	Fruit length	Lady bird beetle	Predatory guild	per three leaves	0.347	ns	positive	weak-to-moderate
2nd crop	Physico-morphic	Fruit length	Spider	Predatory guild	per three leaves	0.78	**	positive	strong
2nd crop	Physico-morphic	Fruit length	Aphid	Sucking guild	per sq cm leaf	0.382	ns	positive	weak-to-moderate
2nd crop	Physico-morphic	Fruit length	Jassid	Sucking guild	per three leaves	0.72	**	positive	strong
2nd crop	Physico-morphic	Fruit length	Mealybug	Sucking guild	per three leaves	0.71	**	positive	strong
2nd crop	Physico-morphic	Fruit length	Whitefly	Sucking guild	per three leaves	0.403	ns	positive	weak-to-moderate
2nd crop	Physico-morphic	Internode length	Ant	Ant guild	per three leaves	-0.13	ns	negative	weak
2nd crop	Physico-morphic	Internode length	BSFB	Chewing guild	per plant	0.553	*	positive	moderate
2nd crop	Physico-morphic	Internode length	Epilachna beetle	Chewing guild	per three leaves	0.779	**	positive	strong
2nd crop	Physico-morphic	Internode length	Flea beetle	Chewing guild	per three leaves	-0.338	ns	negative	weak-to-moderate
2nd crop	Physico-morphic	Internode length	Leaf roller	Chewing guild	per plant	0.333	ns	positive	weak-to-moderate
2nd crop	Physico-morphic	Internode length	Spodoptera sp.	Chewing guild	per plant	0.444	*	positive	weak-to-moderate
2nd crop	Physico-morphic	Internode length	Lady bird beetle	Predatory guild	per three leaves	0.29	ns	positive	weak
2nd crop	Physico-morphic	Internode length	Spider	Predatory guild	per three leaves	0.817	**	positive	strong
2nd crop	Physico-morphic	Internode length	Aphid	Sucking guild	per sq cm leaf	0.435	ns	positive	weak-to-moderate
2nd crop	Physico-morphic	Internode length	Jassid	Sucking guild	per three leaves	0.652	**	positive	moderate
2nd crop	Physico-morphic	Internode length	Mealybug	Sucking guild	per three leaves	0.652	**	positive	moderate
2nd crop	Physico-morphic	Internode length	Whitefly	Sucking guild	per three leaves	0.369	ns	positive	weak-to-moderate
2nd crop	Physico-morphic	Leaf area	Ant	Ant guild	per three leaves	0.031	ns	positive	weak
2nd crop	Physico-morphic	Leaf area	BSFB	Chewing guild	per plant	0.341	ns	positive	weak-to-moderate
2nd crop	Physico-morphic	Leaf area	Epilachna beetle	Chewing guild	per three leaves	-0.669	**	negative	moderate
2nd crop	Physico-morphic	Leaf area	Flea beetle	Chewing guild	per three leaves	0.174	ns	positive	weak
2nd crop	Physico-morphic	Leaf area	Leaf roller	Chewing guild	per plant	-0.167	ns	negative	weak
2nd crop	Physico-morphic	Leaf area	Spodoptera sp.	Chewing guild	per plant	-0.205	ns	negative	weak
2nd crop	Physico-morphic	Leaf area	Lady bird beetle	Predatory guild	per three leaves	-0.504	*	negative	moderate
2nd crop	Physico-morphic	Leaf area	Spider	Predatory guild	per three leaves	-0.165	ns	negative	weak
2nd crop	Physico-morphic	Leaf area	Aphid	Sucking guild	per sq cm leaf	0.12	ns	positive	weak
2nd crop	Physico-morphic	Leaf area	Jassid	Sucking guild	per three leaves	-0.73	**	negative	strong
2nd crop	Physico-morphic	Leaf area	Mealybug	Sucking guild	per three leaves	-0.57	**	negative	moderate
2nd crop	Physico-morphic	Leaf area	Whitefly	Sucking guild	per three leaves	-0.676	**	negative	moderate
2nd crop	Physico-morphic	Leaf thickness	Ant	Ant guild	per three leaves	-0.078	ns	negative	weak
2nd crop	Physico-morphic	Leaf thickness	BSFB	Chewing guild	per plant	-0.288	ns	negative	weak
2nd crop	Physico-morphic	Leaf thickness	Epilachna beetle	Chewing guild	per three leaves	0.672	**	positive	moderate
2nd crop	Physico-morphic	Leaf thickness	Flea beetle	Chewing guild	per three leaves	-0.284	ns	negative	weak
2nd crop	Physico-morphic	Leaf thickness	Leaf roller	Chewing guild	per plant	0.264	ns	positive	weak
2nd crop	Physico-morphic	Leaf thickness	Spodoptera sp.	Chewing guild	per plant	0.326	ns	positive	weak-to-moderate
2nd crop	Physico-morphic	Leaf thickness	Lady bird beetle	Predatory guild	per three leaves	0.478	*	positive	weak-to-moderate
2nd crop	Physico-morphic	Leaf thickness	Spider	Predatory guild	per three leaves	0.175	ns	positive	weak
2nd crop	Physico-morphic	Leaf thickness	Aphid	Sucking guild	per sq cm leaf	-0.063	ns	negative	weak
2nd crop	Physico-morphic	Leaf thickness	Jassid	Sucking guild	per three leaves	0.636	**	positive	moderate
2nd crop	Physico-morphic	Leaf thickness	Mealybug	Sucking guild	per three leaves	0.567	**	positive	moderate
2nd crop	Physico-morphic	Leaf thickness	Whitefly	Sucking guild	per three leaves	0.713	**	positive	strong
2nd crop	Physico-morphic	Pericarp	Ant	Ant guild	per three leaves	-0.093	ns	negative	weak
2nd crop	Physico-morphic	Pericarp	BSFB	Chewing guild	per plant	0.569	**	positive	moderate
2nd crop	Physico-morphic	Pericarp	Epilachna beetle	Chewing guild	per three leaves	0.719	**	positive	strong
2nd crop	Physico-morphic	Pericarp	Flea beetle	Chewing guild	per three leaves	-0.306	ns	negative	weak-to-moderate
2nd crop	Physico-morphic	Pericarp	Leaf roller	Chewing guild	per plant	0.187	ns	positive	weak
2nd crop	Physico-morphic	Pericarp	Spodoptera sp.	Chewing guild	per plant	0.379	ns	positive	weak-to-moderate
2nd crop	Physico-morphic	Pericarp	Lady bird beetle	Predatory guild	per three leaves	0.334	ns	positive	weak-to-moderate
2nd crop	Physico-morphic	Pericarp	Spider	Predatory guild	per three leaves	0.774	**	positive	strong
2nd crop	Physico-morphic	Pericarp	Aphid	Sucking guild	per sq cm leaf	0.417	ns	positive	weak-to-moderate
2nd crop	Physico-morphic	Pericarp	Jassid	Sucking guild	per three leaves	0.641	**	positive	moderate
2nd crop	Physico-morphic	Pericarp	Mealybug	Sucking guild	per three leaves	0.677	**	positive	moderate
2nd crop	Physico-morphic	Pericarp	Whitefly	Sucking guild	per three leaves	0.327	ns	positive	weak-to-moderate
2nd crop	Physico-morphic	Plant height	Ant	Ant guild	per three leaves	-0.167	ns	negative	weak
2nd crop	Physico-morphic	Plant height	BSFB	Chewing guild	per plant	0.162	ns	positive	weak
2nd crop	Physico-morphic	Plant height	Epilachna beetle	Chewing guild	per three leaves	0.912	**	positive	strong
2nd crop	Physico-morphic	Plant height	Flea beetle	Chewing guild	per three leaves	-0.378	ns	negative	weak-to-moderate
2nd crop	Physico-morphic	Plant height	Leaf roller	Chewing guild	per plant	0.228	ns	positive	weak
2nd crop	Physico-morphic	Plant height	Spodoptera sp.	Chewing guild	per plant	0.424	ns	positive	weak-to-moderate
2nd crop	Physico-morphic	Plant height	Lady bird beetle	Predatory guild	per three leaves	0.495	*	positive	weak-to-moderate
2nd crop	Physico-morphic	Plant height	Spider	Predatory guild	per three leaves	0.606	**	positive	moderate
2nd crop	Physico-morphic	Plant height	Aphid	Sucking guild	per sq cm leaf	0.209	ns	positive	weak
2nd crop	Physico-morphic	Plant height	Jassid	Sucking guild	per three leaves	0.875	**	positive	strong
2nd crop	Physico-morphic	Plant height	Mealybug	Sucking guild	per three leaves	0.784	**	positive	strong
2nd crop	Physico-morphic	Plant height	Whitefly	Sucking guild	per three leaves	0.67	**	positive	moderate
2nd crop	Physico-morphic	Trichome density	Ant	Ant guild	per three leaves	-0.121	ns	negative	weak
2nd crop	Physico-morphic	Trichome density	BSFB	Chewing guild	per plant	0.601	**	positive	moderate
2nd crop	Physico-morphic	Trichome density	Epilachna beetle	Chewing guild	per three leaves	-0.627	**	negative	moderate
2nd crop	Physico-morphic	Trichome density	Flea beetle	Chewing guild	per three leaves	-0.276	ns	negative	weak
2nd crop	Physico-morphic	Trichome density	Leaf roller	Chewing guild	per plant	0.233	ns	positive	weak
2nd crop	Physico-morphic	Trichome density	Spodoptera sp.	Chewing guild	per plant	0.402	ns	positive	weak-to-moderate
2nd crop	Physico-morphic	Trichome density	Lady bird beetle	Predatory guild	per three leaves	0.19	ns	positive	weak
2nd crop	Physico-morphic	Trichome density	Spider	Predatory guild	per three leaves	0.803	**	positive	strong
2nd crop	Physico-morphic	Trichome density	Aphid	Sucking guild	per sq cm leaf	0.42	ns	positive	weak-to-moderate
2nd crop	Physico-morphic	Trichome density	Jassid	Sucking guild	per three leaves	-0.519	*	negative	moderate
2nd crop	Physico-morphic	Trichome density	Mealybug	Sucking guild	per three leaves	0.557	*	positive	moderate
2nd crop	Physico-morphic	Trichome density	Whitefly	Sucking guild	per three leaves	0.262	ns	positive	weak
2nd crop	Physico-morphic	Upper girth	Ant	Ant guild	per three leaves	0.115	ns	positive	weak
2nd crop	Physico-morphic	Upper girth	BSFB	Chewing guild	per plant	-0.025	ns	negative	weak
2nd crop	Physico-morphic	Upper girth	Epilachna beetle	Chewing guild	per three leaves	0.71	**	positive	strong
2nd crop	Physico-morphic	Upper girth	Flea beetle	Chewing guild	per three leaves	-0.016	ns	negative	weak
2nd crop	Physico-morphic	Upper girth	Leaf roller	Chewing guild	per plant	0.105	ns	positive	weak
2nd crop	Physico-morphic	Upper girth	Spodoptera sp.	Chewing guild	per plant	0.29	ns	positive	weak
2nd crop	Physico-morphic	Upper girth	Lady bird beetle	Predatory guild	per three leaves	0.457	*	positive	weak-to-moderate
2nd crop	Physico-morphic	Upper girth	Spider	Predatory guild	per three leaves	0.488	*	positive	weak-to-moderate
2nd crop	Physico-morphic	Upper girth	Aphid	Sucking guild	per sq cm leaf	0.1	ns	positive	weak
2nd crop	Physico-morphic	Upper girth	Jassid	Sucking guild	per three leaves	0.682	**	positive	moderate
2nd crop	Physico-morphic	Upper girth	Mealybug	Sucking guild	per three leaves	0.692	**	positive	moderate
2nd crop	Physico-morphic	Upper girth	Whitefly	Sucking guild	per three leaves	0.631	**	positive	moderate
3rd crop	Physico-morphic	Fruit girth	Ant	Ant guild	per three leaves	-0.238	ns	negative	weak
3rd crop	Physico-morphic	Fruit girth	BSFB	Chewing guild	per plant	0.32	ns	positive	weak-to-moderate
3rd crop	Physico-morphic	Fruit girth	Epilachna beetle	Chewing guild	per three leaves	0.444	*	positive	weak-to-moderate
3rd crop	Physico-morphic	Fruit girth	Flea beetle	Chewing guild	per three leaves	-0.183	ns	negative	weak
3rd crop	Physico-morphic	Fruit girth	Leaf roller	Chewing guild	per plant	-0.167	ns	negative	weak
3rd crop	Physico-morphic	Fruit girth	Lady bird beetle	Predatory guild	per three leaves	0.099	ns	positive	weak
3rd crop	Physico-morphic	Fruit girth	Spider	Predatory guild	per three leaves	0.382	ns	positive	weak-to-moderate
3rd crop	Physico-morphic	Fruit girth	Aphid	Sucking guild	per sq cm leaf	0.414	ns	positive	weak-to-moderate
3rd crop	Physico-morphic	Fruit girth	Jassid	Sucking guild	per three leaves	0.745	**	positive	strong
3rd crop	Physico-morphic	Fruit girth	Thrips	Sucking guild	per sq cm leaf	0.365	ns	positive	weak-to-moderate
3rd crop	Physico-morphic	Fruit girth	Whitefly	Sucking guild	per three leaves	0.566	**	positive	moderate
3rd crop	Physico-morphic	Fruit length	Ant	Ant guild	per three leaves	-0.3	ns	negative	weak-to-moderate
3rd crop	Physico-morphic	Fruit length	BSFB	Chewing guild	per plant	0.349	ns	positive	weak-to-moderate
3rd crop	Physico-morphic	Fruit length	Epilachna beetle	Chewing guild	per three leaves	0.275	ns	positive	weak
3rd crop	Physico-morphic	Fruit length	Flea beetle	Chewing guild	per three leaves	-0.33	ns	negative	weak-to-moderate
3rd crop	Physico-morphic	Fruit length	Leaf roller	Chewing guild	per plant	-0.192	ns	negative	weak
3rd crop	Physico-morphic	Fruit length	Lady bird beetle	Predatory guild	per three leaves	-0.015	ns	negative	weak
3rd crop	Physico-morphic	Fruit length	Spider	Predatory guild	per three leaves	0.248	ns	positive	weak
3rd crop	Physico-morphic	Fruit length	Aphid	Sucking guild	per sq cm leaf	0.504	*	positive	moderate
3rd crop	Physico-morphic	Fruit length	Jassid	Sucking guild	per three leaves	0.618	**	positive	moderate
3rd crop	Physico-morphic	Fruit length	Thrips	Sucking guild	per sq cm leaf	0.509	*	positive	moderate
3rd crop	Physico-morphic	Fruit length	Whitefly	Sucking guild	per three leaves	0.396	ns	positive	weak-to-moderate
3rd crop	Physico-morphic	Internode length	Ant	Ant guild	per three leaves	-0.047	ns	negative	weak
3rd crop	Physico-morphic	Internode length	BSFB	Chewing guild	per plant	0.24	ns	positive	weak
3rd crop	Physico-morphic	Internode length	Epilachna beetle	Chewing guild	per three leaves	0.358	ns	positive	weak-to-moderate
3rd crop	Physico-morphic	Internode length	Flea beetle	Chewing guild	per three leaves	-0.036	ns	negative	weak
3rd crop	Physico-morphic	Internode length	Leaf roller	Chewing guild	per plant	-0.059	ns	negative	weak
3rd crop	Physico-morphic	Internode length	Lady bird beetle	Predatory guild	per three leaves	0.013	ns	positive	weak
3rd crop	Physico-morphic	Internode length	Spider	Predatory guild	per three leaves	0.358	ns	positive	weak-to-moderate
3rd crop	Physico-morphic	Internode length	Aphid	Sucking guild	per sq cm leaf	0.307	ns	positive	weak-to-moderate
3rd crop	Physico-morphic	Internode length	Jassid	Sucking guild	per three leaves	0.728	**	positive	strong
3rd crop	Physico-morphic	Internode length	Thrips	Sucking guild	per sq cm leaf	0.221	ns	positive	weak
3rd crop	Physico-morphic	Internode length	Whitefly	Sucking guild	per three leaves	0.621	**	positive	moderate
3rd crop	Physico-morphic	Leaf area	Ant	Ant guild	per three leaves	0.379	ns	positive	weak-to-moderate
3rd crop	Physico-morphic	Leaf area	BSFB	Chewing guild	per plant	-0.167	ns	negative	weak
3rd crop	Physico-morphic	Leaf area	Epilachna beetle	Chewing guild	per three leaves	0.766	**	positive	strong
3rd crop	Physico-morphic	Leaf area	Flea beetle	Chewing guild	per three leaves	0.355	ns	positive	weak-to-moderate
3rd crop	Physico-morphic	Leaf area	Leaf roller	Chewing guild	per plant	0.125	ns	positive	weak
3rd crop	Physico-morphic	Leaf area	Lady bird beetle	Predatory guild	per three leaves	0.065	ns	positive	weak
3rd crop	Physico-morphic	Leaf area	Spider	Predatory guild	per three leaves	0.227	ns	positive	weak
3rd crop	Physico-morphic	Leaf area	Aphid	Sucking guild	per sq cm leaf	-0.671	**	negative	moderate
3rd crop	Physico-morphic	Leaf area	Jassid	Sucking guild	per three leaves	0.487	*	positive	weak-to-moderate
3rd crop	Physico-morphic	Leaf area	Thrips	Sucking guild	per sq cm leaf	-0.655	**	negative	moderate
3rd crop	Physico-morphic	Leaf area	Whitefly	Sucking guild	per three leaves	0.43	ns	positive	weak-to-moderate
3rd crop	Physico-morphic	Leaf thickness	Ant	Ant guild	per three leaves	-0.429	ns	negative	weak-to-moderate
3rd crop	Physico-morphic	Leaf thickness	BSFB	Chewing guild	per plant	0.157	ns	positive	weak
3rd crop	Physico-morphic	Leaf thickness	Epilachna beetle	Chewing guild	per three leaves	-0.52	*	negative	moderate
3rd crop	Physico-morphic	Leaf thickness	Flea beetle	Chewing guild	per three leaves	-0.32	ns	negative	weak-to-moderate
3rd crop	Physico-morphic	Leaf thickness	Leaf roller	Chewing guild	per plant	-0.276	ns	negative	weak
3rd crop	Physico-morphic	Leaf thickness	Lady bird beetle	Predatory guild	per three leaves	0.064	ns	positive	weak
3rd crop	Physico-morphic	Leaf thickness	Spider	Predatory guild	per three leaves	-0.085	ns	negative	weak
3rd crop	Physico-morphic	Leaf thickness	Aphid	Sucking guild	per sq cm leaf	0.709	**	positive	strong
3rd crop	Physico-morphic	Leaf thickness	Jassid	Sucking guild	per three leaves	-0.253	ns	negative	weak
3rd crop	Physico-morphic	Leaf thickness	Thrips	Sucking guild	per sq cm leaf	0.689	**	positive	moderate
3rd crop	Physico-morphic	Leaf thickness	Whitefly	Sucking guild	per three leaves	-0.23	ns	negative	weak
3rd crop	Physico-morphic	Pericarp	Ant	Ant guild	per three leaves	-0.144	ns	negative	weak
3rd crop	Physico-morphic	Pericarp	BSFB	Chewing guild	per plant	0.335	ns	positive	weak-to-moderate
3rd crop	Physico-morphic	Pericarp	Epilachna beetle	Chewing guild	per three leaves	0.554	*	positive	moderate
3rd crop	Physico-morphic	Pericarp	Flea beetle	Chewing guild	per three leaves	-0.101	ns	negative	weak
3rd crop	Physico-morphic	Pericarp	Leaf roller	Chewing guild	per plant	-0.131	ns	negative	weak
3rd crop	Physico-morphic	Pericarp	Lady bird beetle	Predatory guild	per three leaves	0.088	ns	positive	weak
3rd crop	Physico-morphic	Pericarp	Spider	Predatory guild	per three leaves	0.469	*	positive	weak-to-moderate
3rd crop	Physico-morphic	Pericarp	Aphid	Sucking guild	per sq cm leaf	0.272	ns	positive	weak
3rd crop	Physico-morphic	Pericarp	Jassid	Sucking guild	per three leaves	0.82	**	positive	strong
3rd crop	Physico-morphic	Pericarp	Thrips	Sucking guild	per sq cm leaf	0.229	ns	positive	weak
3rd crop	Physico-morphic	Pericarp	Whitefly	Sucking guild	per three leaves	0.633	**	positive	moderate
3rd crop	Physico-morphic	Plant height	Ant	Ant guild	per three leaves	-0.353	ns	negative	weak-to-moderate
3rd crop	Physico-morphic	Plant height	BSFB	Chewing guild	per plant	0.337	ns	positive	weak-to-moderate
3rd crop	Physico-morphic	Plant height	Epilachna beetle	Chewing guild	per three leaves	0.05	ns	positive	weak
3rd crop	Physico-morphic	Plant height	Flea beetle	Chewing guild	per three leaves	-0.323	ns	negative	weak-to-moderate
3rd crop	Physico-morphic	Plant height	Leaf roller	Chewing guild	per plant	-0.241	ns	negative	weak
3rd crop	Physico-morphic	Plant height	Lady bird beetle	Predatory guild	per three leaves	0.013	ns	positive	weak
3rd crop	Physico-morphic	Plant height	Spider	Predatory guild	per three leaves	0.28	ns	positive	weak
3rd crop	Physico-morphic	Plant height	Aphid	Sucking guild	per sq cm leaf	0.693	**	positive	moderate
3rd crop	Physico-morphic	Plant height	Jassid	Sucking guild	per three leaves	0.474	*	positive	weak-to-moderate
3rd crop	Physico-morphic	Plant height	Thrips	Sucking guild	per sq cm leaf	0.667	**	positive	moderate
3rd crop	Physico-morphic	Plant height	Whitefly	Sucking guild	per three leaves	0.364	ns	positive	weak-to-moderate
3rd crop	Physico-morphic	Trichome density	Ant	Ant guild	per three leaves	-0.112	ns	negative	weak
3rd crop	Physico-morphic	Trichome density	BSFB	Chewing guild	per plant	0.318	ns	positive	weak-to-moderate
3rd crop	Physico-morphic	Trichome density	Epilachna beetle	Chewing guild	per three leaves	-0.585	**	negative	moderate
3rd crop	Physico-morphic	Trichome density	Flea beetle	Chewing guild	per three leaves	-0.049	ns	negative	weak
3rd crop	Physico-morphic	Trichome density	Leaf roller	Chewing guild	per plant	-0.136	ns	negative	weak
3rd crop	Physico-morphic	Trichome density	Lady bird beetle	Predatory guild	per three leaves	0.047	ns	positive	weak
3rd crop	Physico-morphic	Trichome density	Spider	Predatory guild	per three leaves	0.5	*	positive	moderate
3rd crop	Physico-morphic	Trichome density	Aphid	Sucking guild	per sq cm leaf	0.218	ns	positive	weak
3rd crop	Physico-morphic	Trichome density	Jassid	Sucking guild	per three leaves	-0.857	**	negative	strong
3rd crop	Physico-morphic	Trichome density	Thrips	Sucking guild	per sq cm leaf	0.184	ns	positive	weak
3rd crop	Physico-morphic	Trichome density	Whitefly	Sucking guild	per three leaves	0.704	**	positive	strong
3rd crop	Physico-morphic	Upper girth	Ant	Ant guild	per three leaves	-0.09	ns	negative	weak
3rd crop	Physico-morphic	Upper girth	BSFB	Chewing guild	per plant	0.367	ns	positive	weak-to-moderate
3rd crop	Physico-morphic	Upper girth	Epilachna beetle	Chewing guild	per three leaves	0.149	ns	positive	weak
3rd crop	Physico-morphic	Upper girth	Flea beetle	Chewing guild	per three leaves	-0.282	ns	negative	weak
3rd crop	Physico-morphic	Upper girth	Leaf roller	Chewing guild	per plant	-0.174	ns	negative	weak
3rd crop	Physico-morphic	Upper girth	Lady bird beetle	Predatory guild	per three leaves	0.037	ns	positive	weak
3rd crop	Physico-morphic	Upper girth	Spider	Predatory guild	per three leaves	0.36	ns	positive	weak-to-moderate
3rd crop	Physico-morphic	Upper girth	Aphid	Sucking guild	per sq cm leaf	0.54	*	positive	moderate
3rd crop	Physico-morphic	Upper girth	Jassid	Sucking guild	per three leaves	0.586	**	positive	moderate
3rd crop	Physico-morphic	Upper girth	Thrips	Sucking guild	per sq cm leaf	0.473	*	positive	weak-to-moderate
3rd crop	Physico-morphic	Upper girth	Whitefly	Sucking guild	per three leaves	0.547	*	positive	moderate
4th crop	Physico-morphic	Fruit girth	Ant	Ant guild	per three leaves	-0.362	ns	negative	weak-to-moderate
4th crop	Physico-morphic	Fruit girth	BSFB	Chewing guild	per plant	0.505	*	positive	moderate
4th crop	Physico-morphic	Fruit girth	Epilachna beetle	Chewing guild	per three leaves	0.288	ns	positive	weak
4th crop	Physico-morphic	Fruit girth	Flea beetle	Chewing guild	per three leaves	0.457	*	positive	weak-to-moderate
4th crop	Physico-morphic	Fruit girth	Lady bird beetle	Predatory guild	per three leaves	0.397	ns	positive	weak-to-moderate
4th crop	Physico-morphic	Fruit girth	Spider	Predatory guild	per three leaves	-0.037	ns	negative	weak
4th crop	Physico-morphic	Fruit girth	Aphid	Sucking guild	per sq cm leaf	0.134	ns	positive	weak
4th crop	Physico-morphic	Fruit girth	Jassid	Sucking guild	per three leaves	0.765	**	positive	strong
4th crop	Physico-morphic	Fruit girth	Thrips	Sucking guild	per sq cm leaf	0.625	**	positive	moderate
4th crop	Physico-morphic	Fruit girth	Whitefly	Sucking guild	per three leaves	0.232	ns	positive	weak
4th crop	Physico-morphic	Fruit length	Ant	Ant guild	per three leaves	-0.369	ns	negative	weak-to-moderate
4th crop	Physico-morphic	Fruit length	BSFB	Chewing guild	per plant	0.375	ns	positive	weak-to-moderate
4th crop	Physico-morphic	Fruit length	Epilachna beetle	Chewing guild	per three leaves	0.235	ns	positive	weak
4th crop	Physico-morphic	Fruit length	Flea beetle	Chewing guild	per three leaves	0.331	ns	positive	weak-to-moderate
4th crop	Physico-morphic	Fruit length	Lady bird beetle	Predatory guild	per three leaves	0.402	ns	positive	weak-to-moderate
4th crop	Physico-morphic	Fruit length	Spider	Predatory guild	per three leaves	0.02	ns	positive	weak
4th crop	Physico-morphic	Fruit length	Aphid	Sucking guild	per sq cm leaf	0.304	ns	positive	weak-to-moderate
4th crop	Physico-morphic	Fruit length	Jassid	Sucking guild	per three leaves	0.754	**	positive	strong
4th crop	Physico-morphic	Fruit length	Thrips	Sucking guild	per sq cm leaf	0.628	**	positive	moderate
4th crop	Physico-morphic	Fruit length	Whitefly	Sucking guild	per three leaves	0.31	ns	positive	weak-to-moderate
4th crop	Physico-morphic	Internode length	Ant	Ant guild	per three leaves	-0.261	ns	negative	weak
4th crop	Physico-morphic	Internode length	BSFB	Chewing guild	per plant	0.359	ns	positive	weak-to-moderate
4th crop	Physico-morphic	Internode length	Epilachna beetle	Chewing guild	per three leaves	-0.048	ns	negative	weak
4th crop	Physico-morphic	Internode length	Flea beetle	Chewing guild	per three leaves	-0.034	ns	negative	weak
4th crop	Physico-morphic	Internode length	Lady bird beetle	Predatory guild	per three leaves	0.606	**	positive	moderate
4th crop	Physico-morphic	Internode length	Spider	Predatory guild	per three leaves	-0.001	ns	negative	weak
4th crop	Physico-morphic	Internode length	Aphid	Sucking guild	per sq cm leaf	0.231	ns	positive	weak
4th crop	Physico-morphic	Internode length	Jassid	Sucking guild	per three leaves	0.535	*	positive	moderate
4th crop	Physico-morphic	Internode length	Thrips	Sucking guild	per sq cm leaf	0.41	ns	positive	weak-to-moderate
4th crop	Physico-morphic	Internode length	Whitefly	Sucking guild	per three leaves	0.219	ns	positive	weak
4th crop	Physico-morphic	Leaf area	Ant	Ant guild	per three leaves	-0.101	ns	negative	weak
4th crop	Physico-morphic	Leaf area	BSFB	Chewing guild	per plant	-0.1	ns	negative	weak
4th crop	Physico-morphic	Leaf area	Epilachna beetle	Chewing guild	per three leaves	-0.563	**	negative	moderate
4th crop	Physico-morphic	Leaf area	Flea beetle	Chewing guild	per three leaves	-0.708	**	negative	strong
4th crop	Physico-morphic	Leaf area	Lady bird beetle	Predatory guild	per three leaves	0.617	**	positive	moderate
4th crop	Physico-morphic	Leaf area	Spider	Predatory guild	per three leaves	0.169	ns	positive	weak
4th crop	Physico-morphic	Leaf area	Aphid	Sucking guild	per sq cm leaf	0.49	*	positive	weak-to-moderate
4th crop	Physico-morphic	Leaf area	Jassid	Sucking guild	per three leaves	-0.269	ns	negative	weak
4th crop	Physico-morphic	Leaf area	Thrips	Sucking guild	per sq cm leaf	-0.115	ns	negative	weak
4th crop	Physico-morphic	Leaf area	Whitefly	Sucking guild	per three leaves	0.203	ns	positive	weak
4th crop	Physico-morphic	Leaf thickness	Ant	Ant guild	per three leaves	-0.081	ns	negative	weak
4th crop	Physico-morphic	Leaf thickness	BSFB	Chewing guild	per plant	0.409	ns	positive	weak-to-moderate
4th crop	Physico-morphic	Leaf thickness	Epilachna beetle	Chewing guild	per three leaves	0.562	**	positive	moderate
4th crop	Physico-morphic	Leaf thickness	Flea beetle	Chewing guild	per three leaves	0.744	**	positive	strong
4th crop	Physico-morphic	Leaf thickness	Lady bird beetle	Predatory guild	per three leaves	-0.227	ns	negative	weak
4th crop	Physico-morphic	Leaf thickness	Spider	Predatory guild	per three leaves	-0.049	ns	negative	weak
4th crop	Physico-morphic	Leaf thickness	Aphid	Sucking guild	per sq cm leaf	-0.239	ns	negative	weak
4th crop	Physico-morphic	Leaf thickness	Jassid	Sucking guild	per three leaves	0.563	**	positive	moderate
4th crop	Physico-morphic	Leaf thickness	Thrips	Sucking guild	per sq cm leaf	0.442	ns	positive	weak-to-moderate
4th crop	Physico-morphic	Leaf thickness	Whitefly	Sucking guild	per three leaves	0.039	ns	positive	weak
4th crop	Physico-morphic	Pericarp	Ant	Ant guild	per three leaves	-0.275	ns	negative	weak
4th crop	Physico-morphic	Pericarp	BSFB	Chewing guild	per plant	0.277	ns	positive	weak
4th crop	Physico-morphic	Pericarp	Epilachna beetle	Chewing guild	per three leaves	0.082	ns	positive	weak
4th crop	Physico-morphic	Pericarp	Flea beetle	Chewing guild	per three leaves	0.205	ns	positive	weak
4th crop	Physico-morphic	Pericarp	Lady bird beetle	Predatory guild	per three leaves	0.341	ns	positive	weak-to-moderate
4th crop	Physico-morphic	Pericarp	Spider	Predatory guild	per three leaves	0.021	ns	positive	weak
4th crop	Physico-morphic	Pericarp	Aphid	Sucking guild	per sq cm leaf	0.473	*	positive	weak-to-moderate
4th crop	Physico-morphic	Pericarp	Jassid	Sucking guild	per three leaves	0.705	**	positive	strong
4th crop	Physico-morphic	Pericarp	Thrips	Sucking guild	per sq cm leaf	0.603	**	positive	moderate
4th crop	Physico-morphic	Pericarp	Whitefly	Sucking guild	per three leaves	0.412	ns	positive	weak-to-moderate
4th crop	Physico-morphic	Plant height	Ant	Ant guild	per three leaves	-0.334	ns	negative	weak-to-moderate
4th crop	Physico-morphic	Plant height	BSFB	Chewing guild	per plant	0.473	*	positive	weak-to-moderate
4th crop	Physico-morphic	Plant height	Epilachna beetle	Chewing guild	per three leaves	0.514	*	positive	moderate
4th crop	Physico-morphic	Plant height	Flea beetle	Chewing guild	per three leaves	0.571	**	positive	moderate
4th crop	Physico-morphic	Plant height	Lady bird beetle	Predatory guild	per three leaves	0.15	ns	positive	weak
4th crop	Physico-morphic	Plant height	Spider	Predatory guild	per three leaves	-0.097	ns	negative	weak
4th crop	Physico-morphic	Plant height	Aphid	Sucking guild	per sq cm leaf	-0.035	ns	negative	weak
4th crop	Physico-morphic	Plant height	Jassid	Sucking guild	per three leaves	0.792	**	positive	strong
4th crop	Physico-morphic	Plant height	Thrips	Sucking guild	per sq cm leaf	0.533	*	positive	moderate
4th crop	Physico-morphic	Plant height	Whitefly	Sucking guild	per three leaves	0.082	ns	positive	weak
4th crop	Physico-morphic	Trichome density	Ant	Ant guild	per three leaves	-0.386	ns	negative	weak-to-moderate
4th crop	Physico-morphic	Trichome density	BSFB	Chewing guild	per plant	0.397	ns	positive	weak-to-moderate
4th crop	Physico-morphic	Trichome density	Epilachna beetle	Chewing guild	per three leaves	0.061	ns	positive	weak
4th crop	Physico-morphic	Trichome density	Flea beetle	Chewing guild	per three leaves	0.123	ns	positive	weak
4th crop	Physico-morphic	Trichome density	Lady bird beetle	Predatory guild	per three leaves	0.603	**	positive	moderate
4th crop	Physico-morphic	Trichome density	Spider	Predatory guild	per three leaves	0.041	ns	positive	weak
4th crop	Physico-morphic	Trichome density	Aphid	Sucking guild	per sq cm leaf	0.368	ns	positive	weak-to-moderate
4th crop	Physico-morphic	Trichome density	Jassid	Sucking guild	per three leaves	-0.618	**	negative	moderate
4th crop	Physico-morphic	Trichome density	Thrips	Sucking guild	per sq cm leaf	-0.549	*	negative	moderate
4th crop	Physico-morphic	Trichome density	Whitefly	Sucking guild	per three leaves	0.314	ns	positive	weak-to-moderate
4th crop	Physico-morphic	Upper girth	Ant	Ant guild	per three leaves	0.006	ns	positive	weak
4th crop	Physico-morphic	Upper girth	BSFB	Chewing guild	per plant	0.185	ns	positive	weak
4th crop	Physico-morphic	Upper girth	Epilachna beetle	Chewing guild	per three leaves	-0.32	ns	negative	weak-to-moderate
4th crop	Physico-morphic	Upper girth	Flea beetle	Chewing guild	per three leaves	-0.377	ns	negative	weak-to-moderate
4th crop	Physico-morphic	Upper girth	Lady bird beetle	Predatory guild	per three leaves	0.578	**	positive	moderate
4th crop	Physico-morphic	Upper girth	Spider	Predatory guild	per three leaves	-0.126	ns	negative	weak
4th crop	Physico-morphic	Upper girth	Aphid	Sucking guild	per sq cm leaf	0.375	ns	positive	weak-to-moderate
4th crop	Physico-morphic	Upper girth	Jassid	Sucking guild	per three leaves	0.3	ns	positive	weak-to-moderate
4th crop	Physico-morphic	Upper girth	Thrips	Sucking guild	per sq cm leaf	0.072	ns	positive	weak
4th crop	Physico-morphic	Upper girth	Whitefly	Sucking guild	per three leaves	0.192	ns	positive	weak
5th crop	Physico-morphic	Fruit girth	Ant	Ant guild	per three leaves	-0.403	ns	negative	weak-to-moderate
5th crop	Physico-morphic	Fruit girth	BSFB	Chewing guild	per plant	0.692	**	positive	moderate
5th crop	Physico-morphic	Fruit girth	Epilachna beetle	Chewing guild	per three leaves	0.74	**	positive	strong
5th crop	Physico-morphic	Fruit girth	Flea beetle	Chewing guild	per three leaves	0.15	ns	positive	weak
5th crop	Physico-morphic	Fruit girth	Lady bird beetle	Predatory guild	per three leaves	0.21	ns	positive	weak
5th crop	Physico-morphic	Fruit girth	Spider	Predatory guild	per three leaves	0.501	*	positive	moderate
5th crop	Physico-morphic	Fruit girth	Aphid	Sucking guild	per sq cm leaf	0.495	*	positive	weak-to-moderate
5th crop	Physico-morphic	Fruit girth	Jassid	Sucking guild	per three leaves	0.273	ns	positive	weak
5th crop	Physico-morphic	Fruit girth	Mealybug	Sucking guild	per three leaves	0.332	ns	positive	weak-to-moderate
5th crop	Physico-morphic	Fruit girth	Thrips	Sucking guild	per sq cm leaf	0.223	ns	positive	weak
5th crop	Physico-morphic	Fruit girth	Whitefly	Sucking guild	per three leaves	0.051	ns	positive	weak
5th crop	Physico-morphic	Fruit length	Ant	Ant guild	per three leaves	-0.341	ns	negative	weak-to-moderate
5th crop	Physico-morphic	Fruit length	BSFB	Chewing guild	per plant	0.569	**	positive	moderate
5th crop	Physico-morphic	Fruit length	Epilachna beetle	Chewing guild	per three leaves	0.632	**	positive	moderate
5th crop	Physico-morphic	Fruit length	Flea beetle	Chewing guild	per three leaves	0.333	ns	positive	weak-to-moderate
5th crop	Physico-morphic	Fruit length	Lady bird beetle	Predatory guild	per three leaves	0.323	ns	positive	weak-to-moderate
5th crop	Physico-morphic	Fruit length	Spider	Predatory guild	per three leaves	0.406	ns	positive	weak-to-moderate
5th crop	Physico-morphic	Fruit length	Aphid	Sucking guild	per sq cm leaf	0.365	ns	positive	weak-to-moderate
5th crop	Physico-morphic	Fruit length	Jassid	Sucking guild	per three leaves	0.465	*	positive	weak-to-moderate
5th crop	Physico-morphic	Fruit length	Mealybug	Sucking guild	per three leaves	0.208	ns	positive	weak
5th crop	Physico-morphic	Fruit length	Thrips	Sucking guild	per sq cm leaf	0.381	ns	positive	weak-to-moderate
5th crop	Physico-morphic	Fruit length	Whitefly	Sucking guild	per three leaves	0.166	ns	positive	weak
5th crop	Physico-morphic	Internode length	Ant	Ant guild	per three leaves	-0.398	ns	negative	weak-to-moderate
5th crop	Physico-morphic	Internode length	BSFB	Chewing guild	per plant	0.347	ns	positive	weak-to-moderate
5th crop	Physico-morphic	Internode length	Epilachna beetle	Chewing guild	per three leaves	0.487	*	positive	weak-to-moderate
5th crop	Physico-morphic	Internode length	Flea beetle	Chewing guild	per three leaves	0.365	ns	positive	weak-to-moderate
5th crop	Physico-morphic	Internode length	Lady bird beetle	Predatory guild	per three leaves	0.194	ns	positive	weak
5th crop	Physico-morphic	Internode length	Spider	Predatory guild	per three leaves	0.395	ns	positive	weak-to-moderate
5th crop	Physico-morphic	Internode length	Aphid	Sucking guild	per sq cm leaf	0.25	ns	positive	weak
5th crop	Physico-morphic	Internode length	Jassid	Sucking guild	per three leaves	0.405	ns	positive	weak-to-moderate
5th crop	Physico-morphic	Internode length	Mealybug	Sucking guild	per three leaves	0.091	ns	positive	weak
5th crop	Physico-morphic	Internode length	Thrips	Sucking guild	per sq cm leaf	0.188	ns	positive	weak
5th crop	Physico-morphic	Internode length	Whitefly	Sucking guild	per three leaves	0.131	ns	positive	weak
5th crop	Physico-morphic	Leaf Area (cm2)	Ant	Ant guild	per three leaves	0.349	ns	positive	weak-to-moderate
5th crop	Physico-morphic	Leaf Area (cm2)	BSFB	Chewing guild	per plant	-0.645	**	negative	moderate
5th crop	Physico-morphic	Leaf Area (cm2)	Epilachna beetle	Chewing guild	per three leaves	-0.726	**	negative	strong
5th crop	Physico-morphic	Leaf Area (cm2)	Flea beetle	Chewing guild	per three leaves	0.546	*	positive	moderate
5th crop	Physico-morphic	Leaf Area (cm2)	Lady bird beetle	Predatory guild	per three leaves	0.133	ns	positive	weak
5th crop	Physico-morphic	Leaf Area (cm2)	Spider	Predatory guild	per three leaves	-0.465	*	negative	weak-to-moderate
5th crop	Physico-morphic	Leaf Area (cm2)	Aphid	Sucking guild	per sq cm leaf	-0.3	ns	negative	weak-to-moderate
5th crop	Physico-morphic	Leaf Area (cm2)	Jassid	Sucking guild	per three leaves	0.641	**	positive	moderate
5th crop	Physico-morphic	Leaf Area (cm2)	Mealybug	Sucking guild	per three leaves	-0.444	*	negative	weak-to-moderate
5th crop	Physico-morphic	Leaf Area (cm2)	Thrips	Sucking guild	per sq cm leaf	0.521	*	positive	moderate
5th crop	Physico-morphic	Leaf Area (cm2)	Whitefly	Sucking guild	per three leaves	0.385	ns	positive	weak-to-moderate
5th crop	Physico-morphic	Leaf thickness	Ant	Ant guild	per three leaves	-0.378	ns	negative	weak-to-moderate
5th crop	Physico-morphic	Leaf thickness	BSFB	Chewing guild	per plant	0.617	**	positive	moderate
5th crop	Physico-morphic	Leaf thickness	Epilachna beetle	Chewing guild	per three leaves	0.745	**	positive	strong
5th crop	Physico-morphic	Leaf thickness	Flea beetle	Chewing guild	per three leaves	0.211	ns	positive	weak
5th crop	Physico-morphic	Leaf thickness	Lady bird beetle	Predatory guild	per three leaves	0.325	ns	positive	weak-to-moderate
5th crop	Physico-morphic	Leaf thickness	Spider	Predatory guild	per three leaves	0.491	*	positive	weak-to-moderate
5th crop	Physico-morphic	Leaf thickness	Aphid	Sucking guild	per sq cm leaf	0.446	*	positive	weak-to-moderate
5th crop	Physico-morphic	Leaf thickness	Jassid	Sucking guild	per three leaves	0.236	ns	positive	weak
5th crop	Physico-morphic	Leaf thickness	Mealybug	Sucking guild	per three leaves	0.184	ns	positive	weak
5th crop	Physico-morphic	Leaf thickness	Thrips	Sucking guild	per sq cm leaf	0.246	ns	positive	weak
5th crop	Physico-morphic	Leaf thickness	Whitefly	Sucking guild	per three leaves	0.083	ns	positive	weak
5th crop	Physico-morphic	Pericarp	Ant	Ant guild	per three leaves	-0.437	ns	negative	weak-to-moderate
5th crop	Physico-morphic	Pericarp	BSFB	Chewing guild	per plant	0.686	**	positive	moderate
5th crop	Physico-morphic	Pericarp	Epilachna beetle	Chewing guild	per three leaves	0.742	**	positive	strong
5th crop	Physico-morphic	Pericarp	Flea beetle	Chewing guild	per three leaves	0.12	ns	positive	weak
5th crop	Physico-morphic	Pericarp	Lady bird beetle	Predatory guild	per three leaves	0.23	ns	positive	weak
5th crop	Physico-morphic	Pericarp	Spider	Predatory guild	per three leaves	0.615	**	positive	moderate
5th crop	Physico-morphic	Pericarp	Aphid	Sucking guild	per sq cm leaf	0.318	ns	positive	weak-to-moderate
5th crop	Physico-morphic	Pericarp	Jassid	Sucking guild	per three leaves	0.24	ns	positive	weak
5th crop	Physico-morphic	Pericarp	Mealybug	Sucking guild	per three leaves	0.183	ns	positive	weak
5th crop	Physico-morphic	Pericarp	Thrips	Sucking guild	per sq cm leaf	0.192	ns	positive	weak
5th crop	Physico-morphic	Pericarp	Whitefly	Sucking guild	per three leaves	0.078	ns	positive	weak
5th crop	Physico-morphic	Plant height	Ant	Ant guild	per three leaves	-0.365	ns	negative	weak-to-moderate
5th crop	Physico-morphic	Plant height	BSFB	Chewing guild	per plant	0.785	**	positive	strong
5th crop	Physico-morphic	Plant height	Epilachna beetle	Chewing guild	per three leaves	0.873	**	positive	strong
5th crop	Physico-morphic	Plant height	Flea beetle	Chewing guild	per three leaves	-0.019	ns	negative	weak
5th crop	Physico-morphic	Plant height	Lady bird beetle	Predatory guild	per three leaves	0.109	ns	positive	weak
5th crop	Physico-morphic	Plant height	Spider	Predatory guild	per three leaves	0.587	**	positive	moderate
5th crop	Physico-morphic	Plant height	Aphid	Sucking guild	per sq cm leaf	0.442	ns	positive	weak-to-moderate
5th crop	Physico-morphic	Plant height	Jassid	Sucking guild	per three leaves	0.065	ns	positive	weak
5th crop	Physico-morphic	Plant height	Mealybug	Sucking guild	per three leaves	0.371	ns	positive	weak-to-moderate
5th crop	Physico-morphic	Plant height	Thrips	Sucking guild	per sq cm leaf	0.089	ns	positive	weak
5th crop	Physico-morphic	Plant height	Whitefly	Sucking guild	per three leaves	-0.109	ns	negative	weak
5th crop	Physico-morphic	Trichome density	Ant	Ant guild	per three leaves	-0.181	ns	negative	weak
5th crop	Physico-morphic	Trichome density	BSFB	Chewing guild	per plant	0.316	ns	positive	weak-to-moderate
5th crop	Physico-morphic	Trichome density	Epilachna beetle	Chewing guild	per three leaves	0.332	ns	positive	weak-to-moderate
5th crop	Physico-morphic	Trichome density	Flea beetle	Chewing guild	per three leaves	0.548	*	positive	moderate
5th crop	Physico-morphic	Trichome density	Lady bird beetle	Predatory guild	per three leaves	0.34	ns	positive	weak-to-moderate
5th crop	Physico-morphic	Trichome density	Spider	Predatory guild	per three leaves	0.254	ns	positive	weak
5th crop	Physico-morphic	Trichome density	Aphid	Sucking guild	per sq cm leaf	0.283	ns	positive	weak
5th crop	Physico-morphic	Trichome density	Jassid	Sucking guild	per three leaves	0.714	**	positive	strong
5th crop	Physico-morphic	Trichome density	Mealybug	Sucking guild	per three leaves	0.035	ns	positive	weak
5th crop	Physico-morphic	Trichome density	Thrips	Sucking guild	per sq cm leaf	-0.606	**	negative	moderate
5th crop	Physico-morphic	Trichome density	Whitefly	Sucking guild	per three leaves	0.353	ns	positive	weak-to-moderate
5th crop	Physico-morphic	Upper girth	Ant	Ant guild	per three leaves	-0.392	ns	negative	weak-to-moderate
5th crop	Physico-morphic	Upper girth	BSFB	Chewing guild	per plant	0.305	ns	positive	weak-to-moderate
5th crop	Physico-morphic	Upper girth	Epilachna beetle	Chewing guild	per three leaves	0.45	*	positive	weak-to-moderate
5th crop	Physico-morphic	Upper girth	Flea beetle	Chewing guild	per three leaves	0.374	ns	positive	weak-to-moderate
5th crop	Physico-morphic	Upper girth	Lady bird beetle	Predatory guild	per three leaves	0.326	ns	positive	weak-to-moderate
5th crop	Physico-morphic	Upper girth	Spider	Predatory guild	per three leaves	0.441	ns	positive	weak-to-moderate
5th crop	Physico-morphic	Upper girth	Aphid	Sucking guild	per sq cm leaf	0.199	ns	positive	weak
5th crop	Physico-morphic	Upper girth	Jassid	Sucking guild	per three leaves	0.423	ns	positive	weak-to-moderate
5th crop	Physico-morphic	Upper girth	Mealybug	Sucking guild	per three leaves	-0.082	ns	negative	weak
5th crop	Physico-morphic	Upper girth	Thrips	Sucking guild	per sq cm leaf	0.313	ns	positive	weak-to-moderate
5th crop	Physico-morphic	Upper girth	Whitefly	Sucking guild	per three leaves	0.351	ns	positive	weak-to-moderate
6th crop	Physico-morphic	Fruit girth	Ant	Ant guild	per three leaves	0.398	ns	positive	weak-to-moderate
6th crop	Physico-morphic	Fruit girth	BSFB	Chewing guild	per plant	0.842	**	positive	strong
6th crop	Physico-morphic	Fruit girth	Epilachna beetle	Chewing guild	per three leaves	0.063	ns	positive	weak
6th crop	Physico-morphic	Fruit girth	Flea beetle	Chewing guild	per three leaves	0.413	ns	positive	weak-to-moderate
6th crop	Physico-morphic	Fruit girth	Lady bird beetle	Predatory guild	per three leaves	0.128	ns	positive	weak
6th crop	Physico-morphic	Fruit girth	Spider	Predatory guild	per three leaves	0.308	ns	positive	weak-to-moderate
6th crop	Physico-morphic	Fruit girth	Aphid	Sucking guild	per sq cm leaf	0.447	*	positive	weak-to-moderate
6th crop	Physico-morphic	Fruit girth	Jassid	Sucking guild	per three leaves	-0.506	*	negative	moderate
6th crop	Physico-morphic	Fruit girth	Mealybug	Sucking guild	per three leaves	0.204	ns	positive	weak
6th crop	Physico-morphic	Fruit girth	Whitefly	Sucking guild	per three leaves	0.119	ns	positive	weak
6th crop	Physico-morphic	Fruit length	Ant	Ant guild	per three leaves	0.333	ns	positive	weak-to-moderate
6th crop	Physico-morphic	Fruit length	BSFB	Chewing guild	per plant	0.81	**	positive	strong
6th crop	Physico-morphic	Fruit length	Epilachna beetle	Chewing guild	per three leaves	0.073	ns	positive	weak
6th crop	Physico-morphic	Fruit length	Flea beetle	Chewing guild	per three leaves	0.312	ns	positive	weak-to-moderate
6th crop	Physico-morphic	Fruit length	Lady bird beetle	Predatory guild	per three leaves	0.116	ns	positive	weak
6th crop	Physico-morphic	Fruit length	Spider	Predatory guild	per three leaves	0.326	ns	positive	weak-to-moderate
6th crop	Physico-morphic	Fruit length	Aphid	Sucking guild	per sq cm leaf	0.378	ns	positive	weak-to-moderate
6th crop	Physico-morphic	Fruit length	Jassid	Sucking guild	per three leaves	-0.528	*	negative	moderate
6th crop	Physico-morphic	Fruit length	Mealybug	Sucking guild	per three leaves	0.102	ns	positive	weak
6th crop	Physico-morphic	Fruit length	Whitefly	Sucking guild	per three leaves	0.056	ns	positive	weak
6th crop	Physico-morphic	Internode length	Ant	Ant guild	per three leaves	0.541	*	positive	moderate
6th crop	Physico-morphic	Internode length	BSFB	Chewing guild	per plant	0.742	**	positive	strong
6th crop	Physico-morphic	Internode length	Epilachna beetle	Chewing guild	per three leaves	0.435	ns	positive	weak-to-moderate
6th crop	Physico-morphic	Internode length	Flea beetle	Chewing guild	per three leaves	0.481	*	positive	weak-to-moderate
6th crop	Physico-morphic	Internode length	Lady bird beetle	Predatory guild	per three leaves	0.142	ns	positive	weak
6th crop	Physico-morphic	Internode length	Spider	Predatory guild	per three leaves	0.016	ns	positive	weak
6th crop	Physico-morphic	Internode length	Aphid	Sucking guild	per sq cm leaf	0.537	*	positive	moderate
6th crop	Physico-morphic	Internode length	Jassid	Sucking guild	per three leaves	-0.635	**	negative	moderate
6th crop	Physico-morphic	Internode length	Mealybug	Sucking guild	per three leaves	0.346	ns	positive	weak-to-moderate
6th crop	Physico-morphic	Internode length	Whitefly	Sucking guild	per three leaves	0.166	ns	positive	weak
6th crop	Physico-morphic	Leaf area	Ant	Ant guild	per three leaves	0.324	ns	positive	weak-to-moderate
6th crop	Physico-morphic	Leaf area	BSFB	Chewing guild	per plant	-0.215	ns	negative	weak
6th crop	Physico-morphic	Leaf area	Epilachna beetle	Chewing guild	per three leaves	0.489	*	positive	weak-to-moderate
6th crop	Physico-morphic	Leaf area	Flea beetle	Chewing guild	per three leaves	0.033	ns	positive	weak
6th crop	Physico-morphic	Leaf area	Lady bird beetle	Predatory guild	per three leaves	0.203	ns	positive	weak
6th crop	Physico-morphic	Leaf area	Spider	Predatory guild	per three leaves	-0.424	ns	negative	weak-to-moderate
6th crop	Physico-morphic	Leaf area	Aphid	Sucking guild	per sq cm leaf	0.138	ns	positive	weak
6th crop	Physico-morphic	Leaf area	Jassid	Sucking guild	per three leaves	-0.041	ns	negative	weak
6th crop	Physico-morphic	Leaf area	Mealybug	Sucking guild	per three leaves	0.3	ns	positive	weak-to-moderate
6th crop	Physico-morphic	Leaf area	Whitefly	Sucking guild	per three leaves	-0.156	ns	negative	weak
6th crop	Physico-morphic	Leaf thickness	Ant	Ant guild	per three leaves	0.359	ns	positive	weak-to-moderate
6th crop	Physico-morphic	Leaf thickness	BSFB	Chewing guild	per plant	0.775	**	positive	strong
6th crop	Physico-morphic	Leaf thickness	Epilachna beetle	Chewing guild	per three leaves	0.096	ns	positive	weak
6th crop	Physico-morphic	Leaf thickness	Flea beetle	Chewing guild	per three leaves	0.355	ns	positive	weak-to-moderate
6th crop	Physico-morphic	Leaf thickness	Lady bird beetle	Predatory guild	per three leaves	0.098	ns	positive	weak
6th crop	Physico-morphic	Leaf thickness	Spider	Predatory guild	per three leaves	0.265	ns	positive	weak
6th crop	Physico-morphic	Leaf thickness	Aphid	Sucking guild	per sq cm leaf	0.414	ns	positive	weak-to-moderate
6th crop	Physico-morphic	Leaf thickness	Jassid	Sucking guild	per three leaves	-0.505	*	negative	moderate
6th crop	Physico-morphic	Leaf thickness	Mealybug	Sucking guild	per three leaves	0.2	ns	positive	weak
6th crop	Physico-morphic	Leaf thickness	Whitefly	Sucking guild	per three leaves	0.04	ns	positive	weak
6th crop	Physico-morphic	Pericarp	Ant	Ant guild	per three leaves	0.342	ns	positive	weak-to-moderate
6th crop	Physico-morphic	Pericarp	BSFB	Chewing guild	per plant	0.847	**	positive	strong
6th crop	Physico-morphic	Pericarp	Epilachna beetle	Chewing guild	per three leaves	0.011	ns	positive	weak
6th crop	Physico-morphic	Pericarp	Flea beetle	Chewing guild	per three leaves	0.371	ns	positive	weak-to-moderate
6th crop	Physico-morphic	Pericarp	Lady bird beetle	Predatory guild	per three leaves	0.108	ns	positive	weak
6th crop	Physico-morphic	Pericarp	Spider	Predatory guild	per three leaves	0.34	ns	positive	weak-to-moderate
6th crop	Physico-morphic	Pericarp	Aphid	Sucking guild	per sq cm leaf	0.474	*	positive	weak-to-moderate
6th crop	Physico-morphic	Pericarp	Jassid	Sucking guild	per three leaves	-0.55	*	negative	moderate
6th crop	Physico-morphic	Pericarp	Mealybug	Sucking guild	per three leaves	0.256	ns	positive	weak
6th crop	Physico-morphic	Pericarp	Whitefly	Sucking guild	per three leaves	0.066	ns	positive	weak
6th crop	Physico-morphic	Plant height	Ant	Ant guild	per three leaves	0.158	ns	positive	weak
6th crop	Physico-morphic	Plant height	BSFB	Chewing guild	per plant	0.74	**	positive	strong
6th crop	Physico-morphic	Plant height	Epilachna beetle	Chewing guild	per three leaves	-0.153	ns	negative	weak
6th crop	Physico-morphic	Plant height	Flea beetle	Chewing guild	per three leaves	0.312	ns	positive	weak-to-moderate
6th crop	Physico-morphic	Plant height	Lady bird beetle	Predatory guild	per three leaves	0.006	ns	positive	weak
6th crop	Physico-morphic	Plant height	Spider	Predatory guild	per three leaves	0.396	ns	positive	weak-to-moderate
6th crop	Physico-morphic	Plant height	Aphid	Sucking guild	per sq cm leaf	0.273	ns	positive	weak
6th crop	Physico-morphic	Plant height	Jassid	Sucking guild	per three leaves	-0.427	ns	negative	weak-to-moderate
6th crop	Physico-morphic	Plant height	Mealybug	Sucking guild	per three leaves	0.064	ns	positive	weak
6th crop	Physico-morphic	Plant height	Whitefly	Sucking guild	per three leaves	0.161	ns	positive	weak
6th crop	Physico-morphic	Trichome density	Ant	Ant guild	per three leaves	0.501	*	positive	moderate
6th crop	Physico-morphic	Trichome density	BSFB	Chewing guild	per plant	0.822	**	positive	strong
6th crop	Physico-morphic	Trichome density	Epilachna beetle	Chewing guild	per three leaves	0.293	ns	positive	weak
6th crop	Physico-morphic	Trichome density	Flea beetle	Chewing guild	per three leaves	0.458	*	positive	weak-to-moderate
6th crop	Physico-morphic	Trichome density	Lady bird beetle	Predatory guild	per three leaves	0.211	ns	positive	weak
6th crop	Physico-morphic	Trichome density	Spider	Predatory guild	per three leaves	0.192	ns	positive	weak
6th crop	Physico-morphic	Trichome density	Aphid	Sucking guild	per sq cm leaf	-0.538	*	negative	moderate
6th crop	Physico-morphic	Trichome density	Jassid	Sucking guild	per three leaves	-0.612	**	negative	moderate
6th crop	Physico-morphic	Trichome density	Mealybug	Sucking guild	per three leaves	0.373	ns	positive	weak-to-moderate
6th crop	Physico-morphic	Trichome density	Whitefly	Sucking guild	per three leaves	-0.005	ns	negative	weak
6th crop	Physico-morphic	Upper girth	Ant	Ant guild	per three leaves	0.143	ns	positive	weak
6th crop	Physico-morphic	Upper girth	BSFB	Chewing guild	per plant	0.517	*	positive	moderate
6th crop	Physico-morphic	Upper girth	Epilachna beetle	Chewing guild	per three leaves	0.209	ns	positive	weak
6th crop	Physico-morphic	Upper girth	Flea beetle	Chewing guild	per three leaves	0.593	**	positive	moderate
6th crop	Physico-morphic	Upper girth	Lady bird beetle	Predatory guild	per three leaves	-0.116	ns	negative	weak
6th crop	Physico-morphic	Upper girth	Spider	Predatory guild	per three leaves	-0.02	ns	negative	weak
6th crop	Physico-morphic	Upper girth	Aphid	Sucking guild	per sq cm leaf	0.069	ns	positive	weak
6th crop	Physico-morphic	Upper girth	Jassid	Sucking guild	per three leaves	-0.271	ns	negative	weak
6th crop	Physico-morphic	Upper girth	Mealybug	Sucking guild	per three leaves	0.137	ns	positive	weak
6th crop	Physico-morphic	Upper girth	Whitefly	Sucking guild	per three leaves	0.256	ns	positive	weak
7th crop	Physico-morphic	Fruit girth	Ant	Ant guild	per three leaves	-0.21	ns	negative	weak
7th crop	Physico-morphic	Fruit girth	BSFB	Chewing guild	per plant	0.53	*	positive	moderate
7th crop	Physico-morphic	Fruit girth	Epilachna beetle	Chewing guild	per three leaves	-0.158	ns	negative	weak
7th crop	Physico-morphic	Fruit girth	Flea beetle	Chewing guild	per three leaves	-0.154	ns	negative	weak
7th crop	Physico-morphic	Fruit girth	Lady bird beetle	Predatory guild	per three leaves	0.343	ns	positive	weak-to-moderate
7th crop	Physico-morphic	Fruit girth	Spider	Predatory guild	per three leaves	0.105	ns	positive	weak
7th crop	Physico-morphic	Fruit girth	Aphid	Sucking guild	per sq cm leaf	0.62	**	positive	moderate
7th crop	Physico-morphic	Fruit girth	Jassid	Sucking guild	per three leaves	-0.434	ns	negative	weak-to-moderate
7th crop	Physico-morphic	Fruit girth	Mealybug	Sucking guild	per three leaves	-0.088	ns	negative	weak
7th crop	Physico-morphic	Fruit girth	Thrips	Sucking guild	per sq cm leaf	0.312	ns	positive	weak-to-moderate
7th crop	Physico-morphic	Fruit girth	Whitefly	Sucking guild	per three leaves	0.144	ns	positive	weak
7th crop	Physico-morphic	Fruit length	Ant	Ant guild	per three leaves	-0.204	ns	negative	weak
7th crop	Physico-morphic	Fruit length	BSFB	Chewing guild	per plant	0.482	*	positive	weak-to-moderate
7th crop	Physico-morphic	Fruit length	Epilachna beetle	Chewing guild	per three leaves	-0.108	ns	negative	weak
7th crop	Physico-morphic	Fruit length	Flea beetle	Chewing guild	per three leaves	-0.133	ns	negative	weak
7th crop	Physico-morphic	Fruit length	Lady bird beetle	Predatory guild	per three leaves	0.363	ns	positive	weak-to-moderate
7th crop	Physico-morphic	Fruit length	Spider	Predatory guild	per three leaves	0.096	ns	positive	weak
7th crop	Physico-morphic	Fruit length	Aphid	Sucking guild	per sq cm leaf	0.613	**	positive	moderate
7th crop	Physico-morphic	Fruit length	Jassid	Sucking guild	per three leaves	-0.434	ns	negative	weak-to-moderate
7th crop	Physico-morphic	Fruit length	Mealybug	Sucking guild	per three leaves	-0.088	ns	negative	weak
7th crop	Physico-morphic	Fruit length	Thrips	Sucking guild	per sq cm leaf	0.283	ns	positive	weak
7th crop	Physico-morphic	Fruit length	Whitefly	Sucking guild	per three leaves	0.147	ns	positive	weak
7th crop	Physico-morphic	Internode length	Ant	Ant guild	per three leaves	-0.331	ns	negative	weak-to-moderate
7th crop	Physico-morphic	Internode length	BSFB	Chewing guild	per plant	0.193	ns	positive	weak
7th crop	Physico-morphic	Internode length	Epilachna beetle	Chewing guild	per three leaves	-0.033	ns	negative	weak
7th crop	Physico-morphic	Internode length	Flea beetle	Chewing guild	per three leaves	-0.165	ns	negative	weak
7th crop	Physico-morphic	Internode length	Lady bird beetle	Predatory guild	per three leaves	0.333	ns	positive	weak-to-moderate
7th crop	Physico-morphic	Internode length	Spider	Predatory guild	per three leaves	0.359	ns	positive	weak-to-moderate
7th crop	Physico-morphic	Internode length	Aphid	Sucking guild	per sq cm leaf	0.247	ns	positive	weak
7th crop	Physico-morphic	Internode length	Jassid	Sucking guild	per three leaves	0.01	ns	positive	weak
7th crop	Physico-morphic	Internode length	Mealybug	Sucking guild	per three leaves	0.077	ns	positive	weak
7th crop	Physico-morphic	Internode length	Thrips	Sucking guild	per sq cm leaf	0.481	*	positive	weak-to-moderate
7th crop	Physico-morphic	Internode length	Whitefly	Sucking guild	per three leaves	0.567	**	positive	moderate
7th crop	Physico-morphic	Leaf Area (cm2)	Ant	Ant guild	per three leaves	0.041	ns	positive	weak
7th crop	Physico-morphic	Leaf Area (cm2)	BSFB	Chewing guild	per plant	-0.492	*	negative	weak-to-moderate
7th crop	Physico-morphic	Leaf Area (cm2)	Epilachna beetle	Chewing guild	per three leaves	0.51	*	positive	moderate
7th crop	Physico-morphic	Leaf Area (cm2)	Flea beetle	Chewing guild	per three leaves	0.368	ns	positive	weak-to-moderate
7th crop	Physico-morphic	Leaf Area (cm2)	Lady bird beetle	Predatory guild	per three leaves	-0.308	ns	negative	weak-to-moderate
7th crop	Physico-morphic	Leaf Area (cm2)	Spider	Predatory guild	per three leaves	0.217	ns	positive	weak
7th crop	Physico-morphic	Leaf Area (cm2)	Aphid	Sucking guild	per sq cm leaf	-0.007	ns	negative	weak
7th crop	Physico-morphic	Leaf Area (cm2)	Jassid	Sucking guild	per three leaves	-0.213	ns	negative	weak
7th crop	Physico-morphic	Leaf Area (cm2)	Mealybug	Sucking guild	per three leaves	-0.209	ns	negative	weak
7th crop	Physico-morphic	Leaf Area (cm2)	Thrips	Sucking guild	per sq cm leaf	-0.645	**	negative	moderate
7th crop	Physico-morphic	Leaf Area (cm2)	Whitefly	Sucking guild	per three leaves	-0.442	ns	negative	weak-to-moderate
7th crop	Physico-morphic	Leaf thickness	Ant	Ant guild	per three leaves	-0.186	ns	negative	weak
7th crop	Physico-morphic	Leaf thickness	BSFB	Chewing guild	per plant	0.527	*	positive	moderate
7th crop	Physico-morphic	Leaf thickness	Epilachna beetle	Chewing guild	per three leaves	-0.174	ns	negative	weak
7th crop	Physico-morphic	Leaf thickness	Flea beetle	Chewing guild	per three leaves	-0.182	ns	negative	weak
7th crop	Physico-morphic	Leaf thickness	Lady bird beetle	Predatory guild	per three leaves	0.394	ns	positive	weak-to-moderate
7th crop	Physico-morphic	Leaf thickness	Spider	Predatory guild	per three leaves	0.114	ns	positive	weak
7th crop	Physico-morphic	Leaf thickness	Aphid	Sucking guild	per sq cm leaf	0.629	**	positive	moderate
7th crop	Physico-morphic	Leaf thickness	Jassid	Sucking guild	per three leaves	-0.418	ns	negative	weak-to-moderate
7th crop	Physico-morphic	Leaf thickness	Mealybug	Sucking guild	per three leaves	-0.127	ns	negative	weak
7th crop	Physico-morphic	Leaf thickness	Thrips	Sucking guild	per sq cm leaf	0.344	ns	positive	weak-to-moderate
7th crop	Physico-morphic	Leaf thickness	Whitefly	Sucking guild	per three leaves	0.16	ns	positive	weak
7th crop	Physico-morphic	Pericarp	Ant	Ant guild	per three leaves	-0.153	ns	negative	weak
7th crop	Physico-morphic	Pericarp	BSFB	Chewing guild	per plant	0.461	*	positive	weak-to-moderate
7th crop	Physico-morphic	Pericarp	Epilachna beetle	Chewing guild	per three leaves	-0.163	ns	negative	weak
7th crop	Physico-morphic	Pericarp	Flea beetle	Chewing guild	per three leaves	-0.12	ns	negative	weak
7th crop	Physico-morphic	Pericarp	Lady bird beetle	Predatory guild	per three leaves	0.377	ns	positive	weak-to-moderate
7th crop	Physico-morphic	Pericarp	Spider	Predatory guild	per three leaves	0.106	ns	positive	weak
7th crop	Physico-morphic	Pericarp	Aphid	Sucking guild	per sq cm leaf	0.579	**	positive	moderate
7th crop	Physico-morphic	Pericarp	Jassid	Sucking guild	per three leaves	-0.384	ns	negative	weak-to-moderate
7th crop	Physico-morphic	Pericarp	Mealybug	Sucking guild	per three leaves	-0.077	ns	negative	weak
7th crop	Physico-morphic	Pericarp	Thrips	Sucking guild	per sq cm leaf	0.322	ns	positive	weak-to-moderate
7th crop	Physico-morphic	Pericarp	Whitefly	Sucking guild	per three leaves	0.225	ns	positive	weak
7th crop	Physico-morphic	Plant height	Ant	Ant guild	per three leaves	-0.138	ns	negative	weak
7th crop	Physico-morphic	Plant height	BSFB	Chewing guild	per plant	0.636	**	positive	moderate
7th crop	Physico-morphic	Plant height	Epilachna beetle	Chewing guild	per three leaves	-0.428	ns	negative	weak-to-moderate
7th crop	Physico-morphic	Plant height	Flea beetle	Chewing guild	per three leaves	-0.319	ns	negative	weak-to-moderate
7th crop	Physico-morphic	Plant height	Lady bird beetle	Predatory guild	per three leaves	0.457	*	positive	weak-to-moderate
7th crop	Physico-morphic	Plant height	Spider	Predatory guild	per three leaves	-0.065	ns	negative	weak
7th crop	Physico-morphic	Plant height	Aphid	Sucking guild	per sq cm leaf	0.432	ns	positive	weak-to-moderate
7th crop	Physico-morphic	Plant height	Jassid	Sucking guild	per three leaves	-0.179	ns	negative	weak
7th crop	Physico-morphic	Plant height	Mealybug	Sucking guild	per three leaves	0.052	ns	positive	weak
7th crop	Physico-morphic	Plant height	Thrips	Sucking guild	per sq cm leaf	0.637	**	positive	moderate
7th crop	Physico-morphic	Plant height	Whitefly	Sucking guild	per three leaves	0.309	ns	positive	weak-to-moderate
7th crop	Physico-morphic	Trichome density	Ant	Ant guild	per three leaves	-0.239	ns	negative	weak
7th crop	Physico-morphic	Trichome density	BSFB	Chewing guild	per plant	0.402	ns	positive	weak-to-moderate
7th crop	Physico-morphic	Trichome density	Epilachna beetle	Chewing guild	per three leaves	-0.028	ns	negative	weak
7th crop	Physico-morphic	Trichome density	Flea beetle	Chewing guild	per three leaves	-0.013	ns	negative	weak
7th crop	Physico-morphic	Trichome density	Lady bird beetle	Predatory guild	per three leaves	0.298	ns	positive	weak
7th crop	Physico-morphic	Trichome density	Spider	Predatory guild	per three leaves	0.155	ns	positive	weak
7th crop	Physico-morphic	Trichome density	Aphid	Sucking guild	per sq cm leaf	-0.605	**	negative	moderate
7th crop	Physico-morphic	Trichome density	Jassid	Sucking guild	per three leaves	-0.456	*	negative	weak-to-moderate
7th crop	Physico-morphic	Trichome density	Mealybug	Sucking guild	per three leaves	-0.123	ns	negative	weak
7th crop	Physico-morphic	Trichome density	Thrips	Sucking guild	per sq cm leaf	0.187	ns	positive	weak
7th crop	Physico-morphic	Trichome density	Whitefly	Sucking guild	per three leaves	0.045	ns	positive	weak
7th crop	Physico-morphic	Upper girth	Ant	Ant guild	per three leaves	-0.035	ns	negative	weak
7th crop	Physico-morphic	Upper girth	BSFB	Chewing guild	per plant	0.493	*	positive	weak-to-moderate
7th crop	Physico-morphic	Upper girth	Epilachna beetle	Chewing guild	per three leaves	0.516	*	positive	moderate
7th crop	Physico-morphic	Upper girth	Flea beetle	Chewing guild	per three leaves	0.254	ns	positive	weak
7th crop	Physico-morphic	Upper girth	Lady bird beetle	Predatory guild	per three leaves	-0.108	ns	negative	weak
7th crop	Physico-morphic	Upper girth	Spider	Predatory guild	per three leaves	0.331	ns	positive	weak-to-moderate
7th crop	Physico-morphic	Upper girth	Aphid	Sucking guild	per sq cm leaf	0.073	ns	positive	weak
7th crop	Physico-morphic	Upper girth	Jassid	Sucking guild	per three leaves	-0.243	ns	negative	weak
7th crop	Physico-morphic	Upper girth	Mealybug	Sucking guild	per three leaves	-0.178	ns	negative	weak
7th crop	Physico-morphic	Upper girth	Thrips	Sucking guild	per sq cm leaf	-0.371	ns	negative	weak-to-moderate
7th crop	Physico-morphic	Upper girth	Whitefly	Sucking guild	per three leaves	-0.38	ns	negative	weak-to-moderate
8th crop	Physico-morphic	Fruit girth	Ant	Ant guild	per three leaves	0.111	ns	positive	weak
8th crop	Physico-morphic	Fruit girth	BSFB	Chewing guild	per plant	0.606	**	positive	moderate
8th crop	Physico-morphic	Fruit girth	Epilachna beetle	Chewing guild	per three leaves	0.409	ns	positive	weak-to-moderate
8th crop	Physico-morphic	Fruit girth	Flea beetle	Chewing guild	per three leaves	0.576	**	positive	moderate
8th crop	Physico-morphic	Fruit girth	Lady bird beetle	Predatory guild	per three leaves	0.275	ns	positive	weak
8th crop	Physico-morphic	Fruit girth	Spider	Predatory guild	per three leaves	0.393	ns	positive	weak-to-moderate
8th crop	Physico-morphic	Fruit girth	Aphid	Sucking guild	per sq cm leaf	0.602	**	positive	moderate
8th crop	Physico-morphic	Fruit girth	Jassid	Sucking guild	per three leaves	0.447	*	positive	weak-to-moderate
8th crop	Physico-morphic	Fruit girth	Mealybug	Sucking guild	per three leaves	0.196	ns	positive	weak
8th crop	Physico-morphic	Fruit girth	Thrips	Sucking guild	per sq cm leaf	0.741	**	positive	strong
8th crop	Physico-morphic	Fruit girth	Whitefly	Sucking guild	per three leaves	0.653	**	positive	moderate
8th crop	Physico-morphic	Fruit length	Ant	Ant guild	per three leaves	0.139	ns	positive	weak
8th crop	Physico-morphic	Fruit length	BSFB	Chewing guild	per plant	0.561	*	positive	moderate
8th crop	Physico-morphic	Fruit length	Epilachna beetle	Chewing guild	per three leaves	0.44	ns	positive	weak-to-moderate
8th crop	Physico-morphic	Fruit length	Flea beetle	Chewing guild	per three leaves	0.554	*	positive	moderate
8th crop	Physico-morphic	Fruit length	Lady bird beetle	Predatory guild	per three leaves	0.272	ns	positive	weak
8th crop	Physico-morphic	Fruit length	Spider	Predatory guild	per three leaves	0.43	ns	positive	weak-to-moderate
8th crop	Physico-morphic	Fruit length	Aphid	Sucking guild	per sq cm leaf	0.633	**	positive	moderate
8th crop	Physico-morphic	Fruit length	Jassid	Sucking guild	per three leaves	0.392	ns	positive	weak-to-moderate
8th crop	Physico-morphic	Fruit length	Mealybug	Sucking guild	per three leaves	0.252	ns	positive	weak
8th crop	Physico-morphic	Fruit length	Thrips	Sucking guild	per sq cm leaf	0.786	**	positive	strong
8th crop	Physico-morphic	Fruit length	Whitefly	Sucking guild	per three leaves	0.707	**	positive	strong
8th crop	Physico-morphic	Internode length	Ant	Ant guild	per three leaves	0.211	ns	positive	weak
8th crop	Physico-morphic	Internode length	BSFB	Chewing guild	per plant	0.399	ns	positive	weak-to-moderate
8th crop	Physico-morphic	Internode length	Epilachna beetle	Chewing guild	per three leaves	0.566	**	positive	moderate
8th crop	Physico-morphic	Internode length	Flea beetle	Chewing guild	per three leaves	0.421	ns	positive	weak-to-moderate
8th crop	Physico-morphic	Internode length	Lady bird beetle	Predatory guild	per three leaves	0.532	*	positive	moderate
8th crop	Physico-morphic	Internode length	Spider	Predatory guild	per three leaves	0.498	*	positive	weak-to-moderate
8th crop	Physico-morphic	Internode length	Aphid	Sucking guild	per sq cm leaf	0.578	**	positive	moderate
8th crop	Physico-morphic	Internode length	Jassid	Sucking guild	per three leaves	0.346	ns	positive	weak-to-moderate
8th crop	Physico-morphic	Internode length	Mealybug	Sucking guild	per three leaves	0.166	ns	positive	weak
8th crop	Physico-morphic	Internode length	Thrips	Sucking guild	per sq cm leaf	0.723	**	positive	strong
8th crop	Physico-morphic	Internode length	Whitefly	Sucking guild	per three leaves	0.616	**	positive	moderate
8th crop	Physico-morphic	Leaf area	Ant	Ant guild	per three leaves	0.353	ns	positive	weak-to-moderate
8th crop	Physico-morphic	Leaf area	BSFB	Chewing guild	per plant	-0.775	**	negative	strong
8th crop	Physico-morphic	Leaf area	Epilachna beetle	Chewing guild	per three leaves	0.455	*	positive	weak-to-moderate
8th crop	Physico-morphic	Leaf area	Flea beetle	Chewing guild	per three leaves	-0.238	ns	negative	weak
8th crop	Physico-morphic	Leaf area	Lady bird beetle	Predatory guild	per three leaves	0.223	ns	positive	weak
8th crop	Physico-morphic	Leaf area	Spider	Predatory guild	per three leaves	-0.27	ns	negative	weak
8th crop	Physico-morphic	Leaf area	Aphid	Sucking guild	per sq cm leaf	0.126	ns	positive	weak
8th crop	Physico-morphic	Leaf area	Jassid	Sucking guild	per three leaves	-0.174	ns	negative	weak
8th crop	Physico-morphic	Leaf area	Mealybug	Sucking guild	per three leaves	0.362	ns	positive	weak-to-moderate
8th crop	Physico-morphic	Leaf area	Thrips	Sucking guild	per sq cm leaf	0.048	ns	positive	weak
8th crop	Physico-morphic	Leaf area	Whitefly	Sucking guild	per three leaves	0.173	ns	positive	weak
8th crop	Physico-morphic	Leaf thickness	Ant	Ant guild	per three leaves	-0.253	ns	negative	weak
8th crop	Physico-morphic	Leaf thickness	BSFB	Chewing guild	per plant	0.768	**	positive	strong
8th crop	Physico-morphic	Leaf thickness	Epilachna beetle	Chewing guild	per three leaves	-0.501	*	negative	moderate
8th crop	Physico-morphic	Leaf thickness	Flea beetle	Chewing guild	per three leaves	0.144	ns	positive	weak
8th crop	Physico-morphic	Leaf thickness	Lady bird beetle	Predatory guild	per three leaves	-0.176	ns	negative	weak
8th crop	Physico-morphic	Leaf thickness	Spider	Predatory guild	per three leaves	0.255	ns	positive	weak
8th crop	Physico-morphic	Leaf thickness	Aphid	Sucking guild	per sq cm leaf	-0.214	ns	negative	weak
8th crop	Physico-morphic	Leaf thickness	Jassid	Sucking guild	per three leaves	0.067	ns	positive	weak
8th crop	Physico-morphic	Leaf thickness	Mealybug	Sucking guild	per three leaves	-0.366	ns	negative	weak-to-moderate
8th crop	Physico-morphic	Leaf thickness	Thrips	Sucking guild	per sq cm leaf	-0.119	ns	negative	weak
8th crop	Physico-morphic	Leaf thickness	Whitefly	Sucking guild	per three leaves	-0.26	ns	negative	weak
8th crop	Physico-morphic	Pericarp	Ant	Ant guild	per three leaves	0.081	ns	positive	weak
8th crop	Physico-morphic	Pericarp	BSFB	Chewing guild	per plant	0.726	**	positive	strong
8th crop	Physico-morphic	Pericarp	Epilachna beetle	Chewing guild	per three leaves	0.328	ns	positive	weak-to-moderate
8th crop	Physico-morphic	Pericarp	Flea beetle	Chewing guild	per three leaves	0.57	**	positive	moderate
8th crop	Physico-morphic	Pericarp	Lady bird beetle	Predatory guild	per three leaves	0.286	ns	positive	weak
8th crop	Physico-morphic	Pericarp	Spider	Predatory guild	per three leaves	0.521	*	positive	moderate
8th crop	Physico-morphic	Pericarp	Aphid	Sucking guild	per sq cm leaf	0.546	*	positive	moderate
8th crop	Physico-morphic	Pericarp	Jassid	Sucking guild	per three leaves	0.406	ns	positive	weak-to-moderate
8th crop	Physico-morphic	Pericarp	Mealybug	Sucking guild	per three leaves	0.105	ns	positive	weak
8th crop	Physico-morphic	Pericarp	Thrips	Sucking guild	per sq cm leaf	0.676	**	positive	moderate
8th crop	Physico-morphic	Pericarp	Whitefly	Sucking guild	per three leaves	0.591	**	positive	moderate
8th crop	Physico-morphic	Plant height	Ant	Ant guild	per three leaves	-0.039	ns	negative	weak
8th crop	Physico-morphic	Plant height	BSFB	Chewing guild	per plant	0.853	**	positive	strong
8th crop	Physico-morphic	Plant height	Epilachna beetle	Chewing guild	per three leaves	0.064	ns	positive	weak
8th crop	Physico-morphic	Plant height	Flea beetle	Chewing guild	per three leaves	0.482	*	positive	weak-to-moderate
8th crop	Physico-morphic	Plant height	Lady bird beetle	Predatory guild	per three leaves	0.132	ns	positive	weak
8th crop	Physico-morphic	Plant height	Spider	Predatory guild	per three leaves	0.461	*	positive	weak-to-moderate
8th crop	Physico-morphic	Plant height	Aphid	Sucking guild	per sq cm leaf	0.369	ns	positive	weak-to-moderate
8th crop	Physico-morphic	Plant height	Jassid	Sucking guild	per three leaves	0.298	ns	positive	weak
8th crop	Physico-morphic	Plant height	Mealybug	Sucking guild	per three leaves	-0.024	ns	negative	weak
8th crop	Physico-morphic	Plant height	Thrips	Sucking guild	per sq cm leaf	0.468	*	positive	weak-to-moderate
8th crop	Physico-morphic	Plant height	Whitefly	Sucking guild	per three leaves	0.394	ns	positive	weak-to-moderate
8th crop	Physico-morphic	Trichome density	Ant	Ant guild	per three leaves	0.271	ns	positive	weak
8th crop	Physico-morphic	Trichome density	BSFB	Chewing guild	per plant	0.306	ns	positive	weak-to-moderate
8th crop	Physico-morphic	Trichome density	Epilachna beetle	Chewing guild	per three leaves	-0.66	**	negative	moderate
8th crop	Physico-morphic	Trichome density	Flea beetle	Chewing guild	per three leaves	0.512	*	positive	moderate
8th crop	Physico-morphic	Trichome density	Lady bird beetle	Predatory guild	per three leaves	0.381	ns	positive	weak-to-moderate
8th crop	Physico-morphic	Trichome density	Spider	Predatory guild	per three leaves	0.407	ns	positive	weak-to-moderate
8th crop	Physico-morphic	Trichome density	Aphid	Sucking guild	per sq cm leaf	-0.736	**	negative	strong
8th crop	Physico-morphic	Trichome density	Jassid	Sucking guild	per three leaves	0.381	ns	positive	weak-to-moderate
8th crop	Physico-morphic	Trichome density	Mealybug	Sucking guild	per three leaves	0.361	ns	positive	weak-to-moderate
8th crop	Physico-morphic	Trichome density	Thrips	Sucking guild	per sq cm leaf	-0.842	**	negative	strong
8th crop	Physico-morphic	Trichome density	Whitefly	Sucking guild	per three leaves	0.827	**	positive	strong
8th crop	Physico-morphic	Upper girth	Ant	Ant guild	per three leaves	-0.113	ns	negative	weak
8th crop	Physico-morphic	Upper girth	BSFB	Chewing guild	per plant	0.413	ns	positive	weak-to-moderate
8th crop	Physico-morphic	Upper girth	Epilachna beetle	Chewing guild	per three leaves	-0.125	ns	negative	weak
8th crop	Physico-morphic	Upper girth	Flea beetle	Chewing guild	per three leaves	0.438	ns	positive	weak-to-moderate
8th crop	Physico-morphic	Upper girth	Lady bird beetle	Predatory guild	per three leaves	-0.318	ns	negative	weak-to-moderate
8th crop	Physico-morphic	Upper girth	Spider	Predatory guild	per three leaves	0.034	ns	positive	weak
8th crop	Physico-morphic	Upper girth	Aphid	Sucking guild	per sq cm leaf	0.124	ns	positive	weak
8th crop	Physico-morphic	Upper girth	Jassid	Sucking guild	per three leaves	0.264	ns	positive	weak
8th crop	Physico-morphic	Upper girth	Mealybug	Sucking guild	per three leaves	-0.048	ns	negative	weak
8th crop	Physico-morphic	Upper girth	Thrips	Sucking guild	per sq cm leaf	0.144	ns	positive	weak
8th crop	Physico-morphic	Upper girth	Whitefly	Sucking guild	per three leaves	-0.139	ns	negative	weak
9th crop	Physico-morphic	Fruit girth	Ant	Ant guild	per three leaves	-0.456	*	negative	weak-to-moderate
9th crop	Physico-morphic	Fruit girth	BSFB	Chewing guild	per plant	0.524	*	positive	moderate
9th crop	Physico-morphic	Fruit girth	Epilachna beetle	Chewing guild	per three leaves	0.006	ns	positive	weak
9th crop	Physico-morphic	Fruit girth	Flea beetle	Chewing guild	per three leaves	-0.229	ns	negative	weak
9th crop	Physico-morphic	Fruit girth	Leaf roller	Chewing guild	per plant	-0.119	ns	negative	weak
9th crop	Physico-morphic	Fruit girth	Lady bird beetle	Predatory guild	per three leaves	0.324	ns	positive	weak-to-moderate
9th crop	Physico-morphic	Fruit girth	Spider	Predatory guild	per three leaves	0.072	ns	positive	weak
9th crop	Physico-morphic	Fruit girth	Aphid	Sucking guild	per sq cm leaf	0.611	**	positive	moderate
9th crop	Physico-morphic	Fruit girth	Jassid	Sucking guild	per three leaves	0.585	**	positive	moderate
9th crop	Physico-morphic	Fruit girth	Thrips	Sucking guild	per sq cm leaf	0.533	*	positive	moderate
9th crop	Physico-morphic	Fruit girth	Whitefly	Sucking guild	per three leaves	0.664	**	positive	moderate
9th crop	Physico-morphic	Fruit length	Ant	Ant guild	per three leaves	-0.604	**	negative	moderate
9th crop	Physico-morphic	Fruit length	BSFB	Chewing guild	per plant	0.714	**	positive	strong
9th crop	Physico-morphic	Fruit length	Epilachna beetle	Chewing guild	per three leaves	-0.131	ns	negative	weak
9th crop	Physico-morphic	Fruit length	Flea beetle	Chewing guild	per three leaves	-0.096	ns	negative	weak
9th crop	Physico-morphic	Fruit length	Leaf roller	Chewing guild	per plant	-0.216	ns	negative	weak
9th crop	Physico-morphic	Fruit length	Lady bird beetle	Predatory guild	per three leaves	0.191	ns	positive	weak
9th crop	Physico-morphic	Fruit length	Spider	Predatory guild	per three leaves	0.025	ns	positive	weak
9th crop	Physico-morphic	Fruit length	Aphid	Sucking guild	per sq cm leaf	0.58	**	positive	moderate
9th crop	Physico-morphic	Fruit length	Jassid	Sucking guild	per three leaves	0.541	*	positive	moderate
9th crop	Physico-morphic	Fruit length	Thrips	Sucking guild	per sq cm leaf	0.627	**	positive	moderate
9th crop	Physico-morphic	Fruit length	Whitefly	Sucking guild	per three leaves	0.581	**	positive	moderate
9th crop	Physico-morphic	Internode length	Ant	Ant guild	per three leaves	-0.173	ns	negative	weak
9th crop	Physico-morphic	Internode length	BSFB	Chewing guild	per plant	0.224	ns	positive	weak
9th crop	Physico-morphic	Internode length	Epilachna beetle	Chewing guild	per three leaves	0.152	ns	positive	weak
9th crop	Physico-morphic	Internode length	Flea beetle	Chewing guild	per three leaves	-0.407	ns	negative	weak-to-moderate
9th crop	Physico-morphic	Internode length	Leaf roller	Chewing guild	per plant	0.097	ns	positive	weak
9th crop	Physico-morphic	Internode length	Lady bird beetle	Predatory guild	per three leaves	0.449	*	positive	weak-to-moderate
9th crop	Physico-morphic	Internode length	Spider	Predatory guild	per three leaves	0.243	ns	positive	weak
9th crop	Physico-morphic	Internode length	Aphid	Sucking guild	per sq cm leaf	0.446	*	positive	weak-to-moderate
9th crop	Physico-morphic	Internode length	Jassid	Sucking guild	per three leaves	0.554	*	positive	moderate
9th crop	Physico-morphic	Internode length	Thrips	Sucking guild	per sq cm leaf	0.29	ns	positive	weak
9th crop	Physico-morphic	Internode length	Whitefly	Sucking guild	per three leaves	0.724	**	positive	strong
9th crop	Physico-morphic	Leaf area	Ant	Ant guild	per three leaves	0.736	**	positive	strong
9th crop	Physico-morphic	Leaf area	BSFB	Chewing guild	per plant	-0.769	**	negative	strong
9th crop	Physico-morphic	Leaf area	Epilachna beetle	Chewing guild	per three leaves	0.51	*	positive	moderate
9th crop	Physico-morphic	Leaf area	Flea beetle	Chewing guild	per three leaves	-0.392	ns	negative	weak-to-moderate
9th crop	Physico-morphic	Leaf area	Leaf roller	Chewing guild	per plant	0.348	ns	positive	weak-to-moderate
9th crop	Physico-morphic	Leaf area	Lady bird beetle	Predatory guild	per three leaves	0.135	ns	positive	weak
9th crop	Physico-morphic	Leaf area	Spider	Predatory guild	per three leaves	0.219	ns	positive	weak
9th crop	Physico-morphic	Leaf area	Aphid	Sucking guild	per sq cm leaf	-0.217	ns	negative	weak
9th crop	Physico-morphic	Leaf area	Jassid	Sucking guild	per three leaves	-0.111	ns	negative	weak
9th crop	Physico-morphic	Leaf area	Thrips	Sucking guild	per sq cm leaf	-0.542	*	negative	moderate
9th crop	Physico-morphic	Leaf area	Whitefly	Sucking guild	per three leaves	0.019	ns	positive	weak
9th crop	Physico-morphic	Leaf thickness	Ant	Ant guild	per three leaves	-0.36	ns	negative	weak-to-moderate
9th crop	Physico-morphic	Leaf thickness	BSFB	Chewing guild	per plant	0.557	*	positive	moderate
9th crop	Physico-morphic	Leaf thickness	Epilachna beetle	Chewing guild	per three leaves	-0.232	ns	negative	weak
9th crop	Physico-morphic	Leaf thickness	Flea beetle	Chewing guild	per three leaves	0.158	ns	positive	weak
9th crop	Physico-morphic	Leaf thickness	Leaf roller	Chewing guild	per plant	0.002	ns	positive	weak
9th crop	Physico-morphic	Leaf thickness	Lady bird beetle	Predatory guild	per three leaves	0.446	*	positive	weak-to-moderate
9th crop	Physico-morphic	Leaf thickness	Spider	Predatory guild	per three leaves	0.244	ns	positive	weak
9th crop	Physico-morphic	Leaf thickness	Aphid	Sucking guild	per sq cm leaf	0.484	*	positive	weak-to-moderate
9th crop	Physico-morphic	Leaf thickness	Jassid	Sucking guild	per three leaves	0.456	*	positive	weak-to-moderate
9th crop	Physico-morphic	Leaf thickness	Thrips	Sucking guild	per sq cm leaf	0.606	**	positive	moderate
9th crop	Physico-morphic	Leaf thickness	Whitefly	Sucking guild	per three leaves	0.509	*	positive	moderate
9th crop	Physico-morphic	Pericarp	Ant	Ant guild	per three leaves	-0.515	*	negative	moderate
9th crop	Physico-morphic	Pericarp	BSFB	Chewing guild	per plant	0.615	**	positive	moderate
9th crop	Physico-morphic	Pericarp	Epilachna beetle	Chewing guild	per three leaves	-0.024	ns	negative	weak
9th crop	Physico-morphic	Pericarp	Flea beetle	Chewing guild	per three leaves	-0.121	ns	negative	weak
9th crop	Physico-morphic	Pericarp	Leaf roller	Chewing guild	per plant	-0.167	ns	negative	weak
9th crop	Physico-morphic	Pericarp	Lady bird beetle	Predatory guild	per three leaves	0.273	ns	positive	weak
9th crop	Physico-morphic	Pericarp	Spider	Predatory guild	per three leaves	0.002	ns	positive	weak
9th crop	Physico-morphic	Pericarp	Aphid	Sucking guild	per sq cm leaf	0.609	**	positive	moderate
9th crop	Physico-morphic	Pericarp	Jassid	Sucking guild	per three leaves	0.59	**	positive	moderate
9th crop	Physico-morphic	Pericarp	Thrips	Sucking guild	per sq cm leaf	0.639	**	positive	moderate
9th crop	Physico-morphic	Pericarp	Whitefly	Sucking guild	per three leaves	0.606	**	positive	moderate
9th crop	Physico-morphic	Plant height	Ant	Ant guild	per three leaves	-0.602	**	negative	moderate
9th crop	Physico-morphic	Plant height	BSFB	Chewing guild	per plant	0.686	**	positive	moderate
9th crop	Physico-morphic	Plant height	Epilachna beetle	Chewing guild	per three leaves	-0.132	ns	negative	weak
9th crop	Physico-morphic	Plant height	Flea beetle	Chewing guild	per three leaves	-0.114	ns	negative	weak
9th crop	Physico-morphic	Plant height	Leaf roller	Chewing guild	per plant	-0.203	ns	negative	weak
9th crop	Physico-morphic	Plant height	Lady bird beetle	Predatory guild	per three leaves	0.215	ns	positive	weak
9th crop	Physico-morphic	Plant height	Spider	Predatory guild	per three leaves	0.045	ns	positive	weak
9th crop	Physico-morphic	Plant height	Aphid	Sucking guild	per sq cm leaf	0.577	**	positive	moderate
9th crop	Physico-morphic	Plant height	Jassid	Sucking guild	per three leaves	0.546	*	positive	moderate
9th crop	Physico-morphic	Plant height	Thrips	Sucking guild	per sq cm leaf	0.608	**	positive	moderate
9th crop	Physico-morphic	Plant height	Whitefly	Sucking guild	per three leaves	0.591	**	positive	moderate
9th crop	Physico-morphic	Trichome density	Ant	Ant guild	per three leaves	-0.114	ns	negative	weak
9th crop	Physico-morphic	Trichome density	BSFB	Chewing guild	per plant	0.153	ns	positive	weak
9th crop	Physico-morphic	Trichome density	Epilachna beetle	Chewing guild	per three leaves	0.263	ns	positive	weak
9th crop	Physico-morphic	Trichome density	Flea beetle	Chewing guild	per three leaves	-0.464	*	negative	weak-to-moderate
9th crop	Physico-morphic	Trichome density	Leaf roller	Chewing guild	per plant	0.026	ns	positive	weak
9th crop	Physico-morphic	Trichome density	Lady bird beetle	Predatory guild	per three leaves	0.407	ns	positive	weak-to-moderate
9th crop	Physico-morphic	Trichome density	Spider	Predatory guild	per three leaves	0.174	ns	positive	weak
9th crop	Physico-morphic	Trichome density	Aphid	Sucking guild	per sq cm leaf	-0.497	*	negative	weak-to-moderate
9th crop	Physico-morphic	Trichome density	Jassid	Sucking guild	per three leaves	-0.512	*	negative	moderate
9th crop	Physico-morphic	Trichome density	Thrips	Sucking guild	per sq cm leaf	0.263	ns	positive	weak
9th crop	Physico-morphic	Trichome density	Whitefly	Sucking guild	per three leaves	0.72	**	positive	strong
9th crop	Physico-morphic	Upper girth	Ant	Ant guild	per three leaves	-0.225	ns	negative	weak
9th crop	Physico-morphic	Upper girth	BSFB	Chewing guild	per plant	0.425	ns	positive	weak-to-moderate
9th crop	Physico-morphic	Upper girth	Epilachna beetle	Chewing guild	per three leaves	0.18	ns	positive	weak
9th crop	Physico-morphic	Upper girth	Flea beetle	Chewing guild	per three leaves	0.487	*	positive	weak-to-moderate
9th crop	Physico-morphic	Upper girth	Leaf roller	Chewing guild	per plant	-0.055	ns	negative	weak
9th crop	Physico-morphic	Upper girth	Lady bird beetle	Predatory guild	per three leaves	0.389	ns	positive	weak-to-moderate
9th crop	Physico-morphic	Upper girth	Spider	Predatory guild	per three leaves	0.151	ns	positive	weak
9th crop	Physico-morphic	Upper girth	Aphid	Sucking guild	per sq cm leaf	0.536	*	positive	moderate
9th crop	Physico-morphic	Upper girth	Jassid	Sucking guild	per three leaves	0.536	*	positive	moderate
9th crop	Physico-morphic	Upper girth	Thrips	Sucking guild	per sq cm leaf	0.409	ns	positive	weak-to-moderate
9th crop	Physico-morphic	Upper girth	Whitefly	Sucking guild	per three leaves	0.768	**	positive	strong
10th crop	Physico-morphic	Fruit girth	Ant	Ant guild	per three leaves	-0.153	ns	negative	weak
10th crop	Physico-morphic	Fruit girth	BSFB	Chewing guild	per plant	0.545	*	positive	moderate
10th crop	Physico-morphic	Fruit girth	Epilachna beetle	Chewing guild	per three leaves	0.214	ns	positive	weak
10th crop	Physico-morphic	Fruit girth	Flea beetle	Chewing guild	per three leaves	0.44	ns	positive	weak-to-moderate
10th crop	Physico-morphic	Fruit girth	Lady bird beetle	Predatory guild	per three leaves	0.394	ns	positive	weak-to-moderate
10th crop	Physico-morphic	Fruit girth	Spider	Predatory guild	per three leaves	0.384	ns	positive	weak-to-moderate
10th crop	Physico-morphic	Fruit girth	Aphid	Sucking guild	per sq cm leaf	0.42	ns	positive	weak-to-moderate
10th crop	Physico-morphic	Fruit girth	Jassid	Sucking guild	per three leaves	0.766	**	positive	strong
10th crop	Physico-morphic	Fruit girth	Thrips	Sucking guild	per sq cm leaf	0.626	**	positive	moderate
10th crop	Physico-morphic	Fruit girth	Whitefly	Sucking guild	per three leaves	0.705	**	positive	strong
10th crop	Physico-morphic	Fruit length	Ant	Ant guild	per three leaves	-0.161	ns	negative	weak
10th crop	Physico-morphic	Fruit length	BSFB	Chewing guild	per plant	0.549	*	positive	moderate
10th crop	Physico-morphic	Fruit length	Epilachna beetle	Chewing guild	per three leaves	0.18	ns	positive	weak
10th crop	Physico-morphic	Fruit length	Flea beetle	Chewing guild	per three leaves	0.421	ns	positive	weak-to-moderate
10th crop	Physico-morphic	Fruit length	Lady bird beetle	Predatory guild	per three leaves	0.368	ns	positive	weak-to-moderate
10th crop	Physico-morphic	Fruit length	Spider	Predatory guild	per three leaves	0.364	ns	positive	weak-to-moderate
10th crop	Physico-morphic	Fruit length	Aphid	Sucking guild	per sq cm leaf	0.401	ns	positive	weak-to-moderate
10th crop	Physico-morphic	Fruit length	Jassid	Sucking guild	per three leaves	0.778	**	positive	strong
10th crop	Physico-morphic	Fruit length	Thrips	Sucking guild	per sq cm leaf	0.635	**	positive	moderate
10th crop	Physico-morphic	Fruit length	Whitefly	Sucking guild	per three leaves	0.697	**	positive	moderate
10th crop	Physico-morphic	Internode length	Ant	Ant guild	per three leaves	-0.043	ns	negative	weak
10th crop	Physico-morphic	Internode length	BSFB	Chewing guild	per plant	0.307	ns	positive	weak-to-moderate
10th crop	Physico-morphic	Internode length	Epilachna beetle	Chewing guild	per three leaves	0.088	ns	positive	weak
10th crop	Physico-morphic	Internode length	Flea beetle	Chewing guild	per three leaves	0.192	ns	positive	weak
10th crop	Physico-morphic	Internode length	Lady bird beetle	Predatory guild	per three leaves	0.295	ns	positive	weak
10th crop	Physico-morphic	Internode length	Spider	Predatory guild	per three leaves	0.41	ns	positive	weak-to-moderate
10th crop	Physico-morphic	Internode length	Aphid	Sucking guild	per sq cm leaf	0.519	*	positive	moderate
10th crop	Physico-morphic	Internode length	Jassid	Sucking guild	per three leaves	0.635	**	positive	moderate
10th crop	Physico-morphic	Internode length	Thrips	Sucking guild	per sq cm leaf	0.526	*	positive	moderate
10th crop	Physico-morphic	Internode length	Whitefly	Sucking guild	per three leaves	0.651	**	positive	moderate
10th crop	Physico-morphic	Leaf area	Ant	Ant guild	per three leaves	0.349	ns	positive	weak-to-moderate
10th crop	Physico-morphic	Leaf area	BSFB	Chewing guild	per plant	-0.76	**	negative	strong
10th crop	Physico-morphic	Leaf area	Epilachna beetle	Chewing guild	per three leaves	-0.219	ns	negative	weak
10th crop	Physico-morphic	Leaf area	Flea beetle	Chewing guild	per three leaves	-0.469	*	negative	weak-to-moderate
10th crop	Physico-morphic	Leaf area	Lady bird beetle	Predatory guild	per three leaves	-0.047	ns	negative	weak
10th crop	Physico-morphic	Leaf area	Spider	Predatory guild	per three leaves	-0.088	ns	negative	weak
10th crop	Physico-morphic	Leaf area	Aphid	Sucking guild	per sq cm leaf	0.574	**	positive	moderate
10th crop	Physico-morphic	Leaf area	Jassid	Sucking guild	per three leaves	-0.364	ns	negative	weak-to-moderate
10th crop	Physico-morphic	Leaf area	Thrips	Sucking guild	per sq cm leaf	-0.425	ns	negative	weak-to-moderate
10th crop	Physico-morphic	Leaf area	Whitefly	Sucking guild	per three leaves	-0.2	ns	negative	weak
10th crop	Physico-morphic	Leaf thickness	Ant	Ant guild	per three leaves	-0.128	ns	negative	weak
10th crop	Physico-morphic	Leaf thickness	BSFB	Chewing guild	per plant	0.443	ns	positive	weak-to-moderate
10th crop	Physico-morphic	Leaf thickness	Epilachna beetle	Chewing guild	per three leaves	-0.01	ns	negative	weak
10th crop	Physico-morphic	Leaf thickness	Flea beetle	Chewing guild	per three leaves	0.222	ns	positive	weak
10th crop	Physico-morphic	Leaf thickness	Lady bird beetle	Predatory guild	per three leaves	0.677	**	positive	moderate
10th crop	Physico-morphic	Leaf thickness	Spider	Predatory guild	per three leaves	0.268	ns	positive	weak
10th crop	Physico-morphic	Leaf thickness	Aphid	Sucking guild	per sq cm leaf	0.363	ns	positive	weak-to-moderate
10th crop	Physico-morphic	Leaf thickness	Jassid	Sucking guild	per three leaves	0.602	**	positive	moderate
10th crop	Physico-morphic	Leaf thickness	Thrips	Sucking guild	per sq cm leaf	0.734	**	positive	strong
10th crop	Physico-morphic	Leaf thickness	Whitefly	Sucking guild	per three leaves	0.719	**	positive	strong
10th crop	Physico-morphic	Pericarp	Ant	Ant guild	per three leaves	-0.076	ns	negative	weak
10th crop	Physico-morphic	Pericarp	BSFB	Chewing guild	per plant	0.409	ns	positive	weak-to-moderate
10th crop	Physico-morphic	Pericarp	Epilachna beetle	Chewing guild	per three leaves	0.19	ns	positive	weak
10th crop	Physico-morphic	Pericarp	Flea beetle	Chewing guild	per three leaves	0.341	ns	positive	weak-to-moderate
10th crop	Physico-morphic	Pericarp	Lady bird beetle	Predatory guild	per three leaves	0.386	ns	positive	weak-to-moderate
10th crop	Physico-morphic	Pericarp	Spider	Predatory guild	per three leaves	0.383	ns	positive	weak-to-moderate
10th crop	Physico-morphic	Pericarp	Aphid	Sucking guild	per sq cm leaf	0.503	*	positive	moderate
10th crop	Physico-morphic	Pericarp	Jassid	Sucking guild	per three leaves	0.681	**	positive	moderate
10th crop	Physico-morphic	Pericarp	Thrips	Sucking guild	per sq cm leaf	0.538	*	positive	moderate
10th crop	Physico-morphic	Pericarp	Whitefly	Sucking guild	per three leaves	0.629	**	positive	moderate
10th crop	Physico-morphic	Plant height	Ant	Ant guild	per three leaves	-0.301	ns	negative	weak-to-moderate
10th crop	Physico-morphic	Plant height	BSFB	Chewing guild	per plant	0.828	**	positive	strong
10th crop	Physico-morphic	Plant height	Epilachna beetle	Chewing guild	per three leaves	0.362	ns	positive	weak-to-moderate
10th crop	Physico-morphic	Plant height	Flea beetle	Chewing guild	per three leaves	0.652	**	positive	moderate
10th crop	Physico-morphic	Plant height	Lady bird beetle	Predatory guild	per three leaves	0.288	ns	positive	weak
10th crop	Physico-morphic	Plant height	Spider	Predatory guild	per three leaves	0.361	ns	positive	weak-to-moderate
10th crop	Physico-morphic	Plant height	Aphid	Sucking guild	per sq cm leaf	-0.019	ns	negative	weak
10th crop	Physico-morphic	Plant height	Jassid	Sucking guild	per three leaves	0.725	**	positive	strong
10th crop	Physico-morphic	Plant height	Thrips	Sucking guild	per sq cm leaf	0.67	**	positive	moderate
10th crop	Physico-morphic	Plant height	Whitefly	Sucking guild	per three leaves	0.593	**	positive	moderate
10th crop	Physico-morphic	Trichome density	Ant	Ant guild	per three leaves	-0.069	ns	negative	weak
10th crop	Physico-morphic	Trichome density	BSFB	Chewing guild	per plant	0.347	ns	positive	weak-to-moderate
10th crop	Physico-morphic	Trichome density	Epilachna beetle	Chewing guild	per three leaves	0.154	ns	positive	weak
10th crop	Physico-morphic	Trichome density	Flea beetle	Chewing guild	per three leaves	0.324	ns	positive	weak-to-moderate
10th crop	Physico-morphic	Trichome density	Lady bird beetle	Predatory guild	per three leaves	0.375	ns	positive	weak-to-moderate
10th crop	Physico-morphic	Trichome density	Spider	Predatory guild	per three leaves	0.363	ns	positive	weak-to-moderate
10th crop	Physico-morphic	Trichome density	Aphid	Sucking guild	per sq cm leaf	-0.561	**	negative	moderate
10th crop	Physico-morphic	Trichome density	Jassid	Sucking guild	per three leaves	0.667	**	positive	moderate
10th crop	Physico-morphic	Trichome density	Thrips	Sucking guild	per sq cm leaf	-0.518	*	negative	moderate
10th crop	Physico-morphic	Trichome density	Whitefly	Sucking guild	per three leaves	0.651	**	positive	moderate
10th crop	Physico-morphic	Upper girth	Ant	Ant guild	per three leaves	0.2	ns	positive	weak
10th crop	Physico-morphic	Upper girth	BSFB	Chewing guild	per plant	0.478	*	positive	weak-to-moderate
10th crop	Physico-morphic	Upper girth	Epilachna beetle	Chewing guild	per three leaves	0.012	ns	positive	weak
10th crop	Physico-morphic	Upper girth	Flea beetle	Chewing guild	per three leaves	-0.074	ns	negative	weak
10th crop	Physico-morphic	Upper girth	Lady bird beetle	Predatory guild	per three leaves	-0.155	ns	negative	weak
10th crop	Physico-morphic	Upper girth	Spider	Predatory guild	per three leaves	0.178	ns	positive	weak
10th crop	Physico-morphic	Upper girth	Aphid	Sucking guild	per sq cm leaf	0.456	*	positive	weak-to-moderate
10th crop	Physico-morphic	Upper girth	Jassid	Sucking guild	per three leaves	-0.174	ns	negative	weak
10th crop	Physico-morphic	Upper girth	Thrips	Sucking guild	per sq cm leaf	-0.187	ns	negative	weak
10th crop	Physico-morphic	Upper girth	Whitefly	Sucking guild	per three leaves	-0.01	ns	negative	weak
11th crop	Physico-morphic	Fruit girth	Ant	Ant guild	per three leaves	-0.286	ns	negative	weak
11th crop	Physico-morphic	Fruit girth	BSFB	Chewing guild	per plant	0.611	**	positive	moderate
11th crop	Physico-morphic	Fruit girth	Epilachna beetle	Chewing guild	per three leaves	0.616	**	positive	moderate
11th crop	Physico-morphic	Fruit girth	Flea beetle	Chewing guild	per three leaves	0.312	ns	positive	weak-to-moderate
11th crop	Physico-morphic	Fruit girth	Lady bird beetle	Predatory guild	per three leaves	0.01	ns	positive	weak
11th crop	Physico-morphic	Fruit girth	Spider	Predatory guild	per three leaves	0.493	*	positive	weak-to-moderate
11th crop	Physico-morphic	Fruit girth	Aphid	Sucking guild	per sq cm leaf	0.389	ns	positive	weak-to-moderate
11th crop	Physico-morphic	Fruit girth	Jassid	Sucking guild	per three leaves	0.456	*	positive	weak-to-moderate
11th crop	Physico-morphic	Fruit girth	Mealybug	Sucking guild	per three leaves	0.138	ns	positive	weak
11th crop	Physico-morphic	Fruit girth	Thrips	Sucking guild	per sq cm leaf	0.493	*	positive	weak-to-moderate
11th crop	Physico-morphic	Fruit girth	Whitefly	Sucking guild	per three leaves	0.063	ns	positive	weak
11th crop	Physico-morphic	Fruit length	Ant	Ant guild	per three leaves	-0.297	ns	negative	weak
11th crop	Physico-morphic	Fruit length	BSFB	Chewing guild	per plant	0.64	**	positive	moderate
11th crop	Physico-morphic	Fruit length	Epilachna beetle	Chewing guild	per three leaves	0.668	**	positive	moderate
11th crop	Physico-morphic	Fruit length	Flea beetle	Chewing guild	per three leaves	0.253	ns	positive	weak
11th crop	Physico-morphic	Fruit length	Lady bird beetle	Predatory guild	per three leaves	-0.02	ns	negative	weak
11th crop	Physico-morphic	Fruit length	Spider	Predatory guild	per three leaves	0.502	*	positive	moderate
11th crop	Physico-morphic	Fruit length	Aphid	Sucking guild	per sq cm leaf	0.395	ns	positive	weak-to-moderate
11th crop	Physico-morphic	Fruit length	Jassid	Sucking guild	per three leaves	0.413	ns	positive	weak-to-moderate
11th crop	Physico-morphic	Fruit length	Mealybug	Sucking guild	per three leaves	0.173	ns	positive	weak
11th crop	Physico-morphic	Fruit length	Thrips	Sucking guild	per sq cm leaf	0.454	*	positive	weak-to-moderate
11th crop	Physico-morphic	Fruit length	Whitefly	Sucking guild	per three leaves	-0.01	ns	negative	weak
11th crop	Physico-morphic	Internode length	Ant	Ant guild	per three leaves	-0.398	ns	negative	weak-to-moderate
11th crop	Physico-morphic	Internode length	BSFB	Chewing guild	per plant	0.512	*	positive	moderate
11th crop	Physico-morphic	Internode length	Epilachna beetle	Chewing guild	per three leaves	0.515	*	positive	moderate
11th crop	Physico-morphic	Internode length	Flea beetle	Chewing guild	per three leaves	0.219	ns	positive	weak
11th crop	Physico-morphic	Internode length	Lady bird beetle	Predatory guild	per three leaves	0.042	ns	positive	weak
11th crop	Physico-morphic	Internode length	Spider	Predatory guild	per three leaves	0.427	ns	positive	weak-to-moderate
11th crop	Physico-morphic	Internode length	Aphid	Sucking guild	per sq cm leaf	0.315	ns	positive	weak-to-moderate
11th crop	Physico-morphic	Internode length	Jassid	Sucking guild	per three leaves	0.353	ns	positive	weak-to-moderate
11th crop	Physico-morphic	Internode length	Mealybug	Sucking guild	per three leaves	0.12	ns	positive	weak
11th crop	Physico-morphic	Internode length	Thrips	Sucking guild	per sq cm leaf	0.356	ns	positive	weak-to-moderate
11th crop	Physico-morphic	Internode length	Whitefly	Sucking guild	per three leaves	0.127	ns	positive	weak
11th crop	Physico-morphic	Leaf area	Ant	Ant guild	per three leaves	0.404	ns	positive	weak-to-moderate
11th crop	Physico-morphic	Leaf area	BSFB	Chewing guild	per plant	-0.634	**	negative	moderate
11th crop	Physico-morphic	Leaf area	Epilachna beetle	Chewing guild	per three leaves	-0.763	**	negative	strong
11th crop	Physico-morphic	Leaf area	Flea beetle	Chewing guild	per three leaves	0.509	*	positive	moderate
11th crop	Physico-morphic	Leaf area	Lady bird beetle	Predatory guild	per three leaves	0.335	ns	positive	weak-to-moderate
11th crop	Physico-morphic	Leaf area	Spider	Predatory guild	per three leaves	-0.605	**	negative	moderate
11th crop	Physico-morphic	Leaf area	Aphid	Sucking guild	per sq cm leaf	-0.265	ns	negative	weak
11th crop	Physico-morphic	Leaf area	Jassid	Sucking guild	per three leaves	0.561	*	positive	moderate
11th crop	Physico-morphic	Leaf area	Mealybug	Sucking guild	per three leaves	-0.422	ns	negative	weak-to-moderate
11th crop	Physico-morphic	Leaf area	Thrips	Sucking guild	per sq cm leaf	0.499	*	positive	weak-to-moderate
11th crop	Physico-morphic	Leaf area	Whitefly	Sucking guild	per three leaves	0.515	*	positive	moderate
11th crop	Physico-morphic	Leaf thickness	Ant	Ant guild	per three leaves	-0.377	ns	negative	weak-to-moderate
11th crop	Physico-morphic	Leaf thickness	BSFB	Chewing guild	per plant	0.737	**	positive	strong
11th crop	Physico-morphic	Leaf thickness	Epilachna beetle	Chewing guild	per three leaves	0.787	**	positive	strong
11th crop	Physico-morphic	Leaf thickness	Flea beetle	Chewing guild	per three leaves	0.141	ns	positive	weak
11th crop	Physico-morphic	Leaf thickness	Lady bird beetle	Predatory guild	per three leaves	0.019	ns	positive	weak
11th crop	Physico-morphic	Leaf thickness	Spider	Predatory guild	per three leaves	0.498	*	positive	weak-to-moderate
11th crop	Physico-morphic	Leaf thickness	Aphid	Sucking guild	per sq cm leaf	0.429	ns	positive	weak-to-moderate
11th crop	Physico-morphic	Leaf thickness	Jassid	Sucking guild	per three leaves	0.172	ns	positive	weak
11th crop	Physico-morphic	Leaf thickness	Mealybug	Sucking guild	per three leaves	0.357	ns	positive	weak-to-moderate
11th crop	Physico-morphic	Leaf thickness	Thrips	Sucking guild	per sq cm leaf	0.314	ns	positive	weak-to-moderate
11th crop	Physico-morphic	Leaf thickness	Whitefly	Sucking guild	per three leaves	-0.154	ns	negative	weak
11th crop	Physico-morphic	Pericarp	Ant	Ant guild	per three leaves	-0.357	ns	negative	weak-to-moderate
11th crop	Physico-morphic	Pericarp	BSFB	Chewing guild	per plant	0.753	**	positive	strong
11th crop	Physico-morphic	Pericarp	Epilachna beetle	Chewing guild	per three leaves	0.807	**	positive	strong
11th crop	Physico-morphic	Pericarp	Flea beetle	Chewing guild	per three leaves	0.112	ns	positive	weak
11th crop	Physico-morphic	Pericarp	Lady bird beetle	Predatory guild	per three leaves	-0.107	ns	negative	weak
11th crop	Physico-morphic	Pericarp	Spider	Predatory guild	per three leaves	0.537	*	positive	moderate
11th crop	Physico-morphic	Pericarp	Aphid	Sucking guild	per sq cm leaf	0.439	ns	positive	weak-to-moderate
11th crop	Physico-morphic	Pericarp	Jassid	Sucking guild	per three leaves	0.214	ns	positive	weak
11th crop	Physico-morphic	Pericarp	Mealybug	Sucking guild	per three leaves	0.356	ns	positive	weak-to-moderate
11th crop	Physico-morphic	Pericarp	Thrips	Sucking guild	per sq cm leaf	0.28	ns	positive	weak
11th crop	Physico-morphic	Pericarp	Whitefly	Sucking guild	per three leaves	-0.106	ns	negative	weak
11th crop	Physico-morphic	Plant height	Ant	Ant guild	per three leaves	-0.383	ns	negative	weak-to-moderate
11th crop	Physico-morphic	Plant height	BSFB	Chewing guild	per plant	0.779	**	positive	strong
11th crop	Physico-morphic	Plant height	Epilachna beetle	Chewing guild	per three leaves	0.858	**	positive	strong
11th crop	Physico-morphic	Plant height	Flea beetle	Chewing guild	per three leaves	0.009	ns	positive	weak
11th crop	Physico-morphic	Plant height	Lady bird beetle	Predatory guild	per three leaves	-0.092	ns	negative	weak
11th crop	Physico-morphic	Plant height	Spider	Predatory guild	per three leaves	0.649	**	positive	moderate
11th crop	Physico-morphic	Plant height	Aphid	Sucking guild	per sq cm leaf	0.441	ns	positive	weak-to-moderate
11th crop	Physico-morphic	Plant height	Jassid	Sucking guild	per three leaves	0.06	ns	positive	weak
11th crop	Physico-morphic	Plant height	Mealybug	Sucking guild	per three leaves	0.346	ns	positive	weak-to-moderate
11th crop	Physico-morphic	Plant height	Thrips	Sucking guild	per sq cm leaf	0.142	ns	positive	weak
11th crop	Physico-morphic	Plant height	Whitefly	Sucking guild	per three leaves	-0.165	ns	negative	weak
11th crop	Physico-morphic	Trichome density	Ant	Ant guild	per three leaves	-0.112	ns	negative	weak
11th crop	Physico-morphic	Trichome density	BSFB	Chewing guild	per plant	0.367	ns	positive	weak-to-moderate
11th crop	Physico-morphic	Trichome density	Epilachna beetle	Chewing guild	per three leaves	0.302	ns	positive	weak-to-moderate
11th crop	Physico-morphic	Trichome density	Flea beetle	Chewing guild	per three leaves	0.514	*	positive	moderate
11th crop	Physico-morphic	Trichome density	Lady bird beetle	Predatory guild	per three leaves	0.161	ns	positive	weak
11th crop	Physico-morphic	Trichome density	Spider	Predatory guild	per three leaves	0.244	ns	positive	weak
11th crop	Physico-morphic	Trichome density	Aphid	Sucking guild	per sq cm leaf	0.272	ns	positive	weak
11th crop	Physico-morphic	Trichome density	Jassid	Sucking guild	per three leaves	-0.706	**	negative	strong
11th crop	Physico-morphic	Trichome density	Mealybug	Sucking guild	per three leaves	-0.042	ns	negative	weak
11th crop	Physico-morphic	Trichome density	Thrips	Sucking guild	per sq cm leaf	-0.713	**	negative	strong
11th crop	Physico-morphic	Trichome density	Whitefly	Sucking guild	per three leaves	0.288	ns	positive	weak
11th crop	Physico-morphic	Upper girth	Ant	Ant guild	per three leaves	-0.247	ns	negative	weak
11th crop	Physico-morphic	Upper girth	BSFB	Chewing guild	per plant	0.342	ns	positive	weak-to-moderate
11th crop	Physico-morphic	Upper girth	Epilachna beetle	Chewing guild	per three leaves	0.427	ns	positive	weak-to-moderate
11th crop	Physico-morphic	Upper girth	Flea beetle	Chewing guild	per three leaves	0.177	ns	positive	weak
11th crop	Physico-morphic	Upper girth	Lady bird beetle	Predatory guild	per three leaves	0.088	ns	positive	weak
11th crop	Physico-morphic	Upper girth	Spider	Predatory guild	per three leaves	0.406	ns	positive	weak-to-moderate
11th crop	Physico-morphic	Upper girth	Aphid	Sucking guild	per sq cm leaf	0.333	ns	positive	weak-to-moderate
11th crop	Physico-morphic	Upper girth	Jassid	Sucking guild	per three leaves	0.386	ns	positive	weak-to-moderate
11th crop	Physico-morphic	Upper girth	Mealybug	Sucking guild	per three leaves	-0.049	ns	negative	weak
11th crop	Physico-morphic	Upper girth	Thrips	Sucking guild	per sq cm leaf	0.315	ns	positive	weak-to-moderate
11th crop	Physico-morphic	Upper girth	Whitefly	Sucking guild	per three leaves	0.191	ns	positive	weak

## Sheet: S4_Regression_R2
Table S4. Complete regression equations and R² values for physico-morphic and biochemical predictor blocks.
Predictor abbreviations follow the thesis tables: PH = plant height, UG = upper girth, IL = internode length, T = trichome density, LT = leaf thickness, LA = leaf area, FL = fruit length, FG = fruit girth, P = pericarp.
Crop	Predictor block	Response guild	Regression equation	R²
1st crop	Biochemical predictors	Ant guild	Ant= 0.013+0.236Chlorophyll+0.410Phenol+3.294Protein-2.147Carbohydrate	0.724
1st crop	Biochemical predictors	Chewing guild	Epilachna beetle = 0.668+0.952 Chlorophyll+0.294Phenol+2.175Protein-3.217Carbohydrate Flea beetle= 0.056+0.090Chlorophyll+0.288Phenol-1.233Protein+1.537Carbohydrate BSFB = 0.041+0.3167Chlorophyll+0.757Phenol-1.427Protein+2.249Carbohydrate Leaf roller = 0.174+0.080Chlorophyll+0.061Phenol+1.538Protein-1.268Carbohydrate	0.333
1st crop	Biochemical predictors	Predatory guild	Lady bird beetle = 1.409-1.205Chlorophyll-1.222Phenol-4.534Protein+5.061Carbohydrate Spider = 0.437-0.091 Chlorophyll-0.098Phenol+0.294Protein+0.136Carbohydrate	0.194
1st crop	Biochemical predictors	Sucking guild	Mealybug= 0.302+2.687chlorophyll-0.585Phenol +2.574Protein-1.013Carbohydrate Whitefly= 0.97160-0.322Chlorophyll+0.070Phenol+1.991Protein-1.825Carbohydrate Jassid = -0.017-0.176Chlorophyll+0.284Phenol+0.154Protein+0.693Carbohydrate Aphid = -0.734+3.579Chlorophyll+0.147Phenol-14.623Protein+15.484Carbohydrate	0.455
2nd crop	Biochemical predictors	Ant guild	Ant = 0.161+0.178Chlorophyll+0.154Phenol-0.731Protein+0.690Carbohydrate	0.091
2nd crop	Biochemical predictors	Chewing guild	Epilachna beetle = 0.486-0.068Chlorophyll-0.371Phenol-0.928Protein+2.026Carbohydrate Flea beetle = 0.282+0.032Chlorophyll+0.054Phenol+0.301Protein-0.401Carbohydrate BSFB = 0.684-0.057Chlorophyll-0.511Phenol-0.710Protein+0.514Carbohydrate	0.835
2nd crop	Biochemical predictors	Predatory guild	Lady bird beetle = -0.374+0.139Chlorophyll+0.523Phenol-1.970Protein+3.280Carbohydrate Spider = 0.740+0.333Chlorophyll-0.453Phenol+2.854Protein-2.956Carbohydrate	0.339
2nd crop	Biochemical predictors	Sucking guild	Mealybug = 0.622-0.054Chlorophyll-0.212Phenol-0.684Protein+1.853Carbohydrate Whitefly = -0.744+0.790Chlorophyll+1.159Phenol-0.162Protein+3.258Carbohydrate Jassid = 0.119+0.173 Chlorophyll-0.001Phenol-2.428Protein+3.457Carbohydrate Aphid = 0.588-0.285Chlorophyll-0.315Phenol+0.046Protein-0.013Carbohydrate	0.626
3rd crop	Biochemical predictors	Ant guild	Ant = 0.830-0.422Chlorophyll-0.148Phenol-1.032Protein+0.905Carbohydrate	0.324
3rd crop	Biochemical predictors	Chewing guild	Epilachna beetle = 1.078-0.162Chlorophyll-0.836Phenol-0.149Protein-0.204Carbohydrate Flea beetle = 0.561+0.056Chlorophyll-0.069Phenol +0.415Protein-0.712Carbohydrate BFSB = 0.467-0.182 Chlorophyll-0.394Phenol-2.020Protein+2.577Carbohydrate	0.448
3rd crop	Biochemical predictors	Predatory guild	Lady bird beetle = 0.445-0.208 Chlorophyll-0.082Phenol+0.640Protein-0.581Carbohydrate Spider = 0.655+0.049Chlorophyll-0.243Phenol-0.116Protein+0.081Carbohydrate	0.036
3rd crop	Biochemical predictors	Sucking guild	Whitefly = 1.686-0.131Chlorophyll-1.097Phenol-0.228Protein+0.064Carbohydrate Jassid = 2.123-0.270 Chlorophyll-1.824Phenol+0.852Protein-1.106Carbohydrate Aphid = -0.860-2.139 Chlorophyll+1.951Phenol-0.069Protein+9.455Carbohydrate Thrips = -0.195+0.107Chlorophyll+1.632Phenol-1.326Protein+5.781Carbohydrate	0.532
4th crop	Biochemical predictors	Ant guild	Ant = 0.455-0.243Chlorophyll+0.204Phenol+1.719Protein-1.731Carbohydrate	0.391
4th crop	Biochemical predictors	Chewing guild	Epilachna beetle= 0.041+0.163Chlorophyll+0.194Phenol-1.387Protein+1.902Carbohydrate Flea beetle = -0.077+0.126Chlorophyll+0.452Phenol+1.158Protein-0.281Carbohydrate BSFB = 0.742+0.057 Chlorophyll-0.650Phenol+0.533Protein +0.0094Carbohydrate	0.462
4th crop	Biochemical predictors	Predatory guild	Lady bird beetle= 1.036-0.159Chlorophyll-0.911Phenol-0.908Protein+0.640Carbohydrate Spider = 0.423+0.440Chlorophyll+0.092Phenol-0.202Protein-0.089Carbohydrate	0.592
4th crop	Biochemical predictors	Sucking guild	Whitefly = 1.800+0.711 Chlorophyll-0.051Phenol+0.799Protein-1.252Carbohydrate Jassid = 1.36606+0.0281Chlorophyll-0.556Phenol+4.525Protein-3.532Carbohydrate Aphid= 3.547+1.0899Chlorophyll-2.591Phenol-1.940Protein -0.469Carbohydrate Thrips = 1.568+2.406Chlorophyll-0.456Phenol+8.850Protein-8.633Carbohydrate	0.173
5th crop	Biochemical predictors	Ant guild	Ant = 0.387+0.628Chlorophyll+0.184Phenol+0.359Protein-1.1374Carbohydrate	0.353
5th crop	Biochemical predictors	Chewing guild	Epilachna beetle = -0.274+0.807Chlorophyll+0.388Phenol +0.073Protein+1.835Carbohydrate Flea beetle = 1.329+0.163Chlorophyll-0.884Phenol+0.907Protein-1.679Carbohydrate BSFB = 0.012+0.409Chlorophyll+0.202Phenol+0.656Protein+ 0.303Carbohydrate	0.824
5th crop	Biochemical predictors	Predatory guild	Lady bird beetle = 0.297+0.024Chlorophyll-0.096Phenol -0.397Protein+0.401Carbohydrate Spider. = 0.059+0.343Chlorophyll+0.139Phenol+0.120Protein+0.033Carbohydrate	0.194
5th crop	Biochemical predictors	Sucking guild	Mealybug = 0.262-0.158Chlorophyll-0.015Phenol+0.324Protein-0.162Carbohydrate Whitefly = 1.308+1.407Chlorophyll-0.587Phenol-0.853Protein-0.678Carbohydrate Jassid = 4.011-0.212Chlorophyll-3.576Phenol-0.347Protein-1.522Carbohydrate Aphid = 0.388-0.427Chlorophyll-0.136Phenol-0.469Protein+1.137Carbohydrate Thrips = 3.089+1.252Chlorophyll-2.77Phenol-1.265Protein-1.113Carbohydrate	0.345
6th crop	Biochemical predictors	Ant guild	Ant = 1.397+1.040Chlorophyll-0.795Phenol+1.624Protein-2.83Carbohydrate	0.466
6th crop	Biochemical predictors	Chewing guild	Epilachna beetle = 2.393+0.501Chlorophyll-0.763Phenol+3.941Protein-5.702Carbohydrate Flea beetle= 0.220+0.323Chlorophyll-0.013Phenol+0.262protein-0.444Carbohydrate BSFB = 0.900+0.445Chlorophyll-0.721Phenol+0.389Protein-0.263Carbohydrate	0.318
6th crop	Biochemical predictors	Predatory guild	Lady bird beetle = 0.252+0.024Chlorophyll-0.025Phenol+0.080Protein-0.121Carbohydrate Spider= 0.302-0.160Chlorophyll-0.043Pheno-0.298Protein+0.565Carbohydrate	0.117
6th crop	Biochemical predictors	Sucking guild	Mealybug = 0.627+0.290Chlorophyll-0.587Phenol-1.588Protein+1.253Carbohydrate Whitefly = 0.316+0.780Chlorophyll+0.450Phenol+2.245Protein-2.639Carbohydrate Jassid = 0.224-0.089Chlorophyll+0.481Phenol+0.269Protein-0.242Carbohydrate Aphid= 0.771+0.364Chlorophyll-0.888Phenol-4.041Protein+4.148Carbohydrate	0.286
7th crop	Biochemical predictors	Ant guild	Ant = -0.742+2.184Chlorophyll+1.277Phenol-3.66Protei+3.324Carbohydrate	0.322
7th crop	Biochemical predictors	Chewing guild	Epilachna beetle = 1.152-0.283Chlorophyll-0.286Phenol-0.927Protein+0.615Carbohydrate Flea beetle = 0.441-0.132Chlorophyll-0.044Phenol-0.480Protein+0.460Carbohydrate BSFB = 0.899-0.148Chlorophyll-0.261Phenol+1.760Protein-1.172Carbohydrate	0.248
7th crop	Biochemical predictors	Predatory guild	Lady bird beetle= 0.167+0.040Chlorophyll+0.003Phenol-0.186Protein+0.304Carbohydrate Spider= 0.889-0.476Chlorophyll-0.299Phenol+0.297Protein-0.250Carbohydrate	0.216
7th crop	Biochemical predictors	Sucking guild	Mealybug = 0.251-0.105Chlorophyll+0.013Phenol +0.027Protein+0.073Carbohydrate Jassid= -0.620+0.742Chlorophyll+0.634Phenol-1.775Protein+2.380Carbohydrate Whitefly = 0.188-0.134 Chlorophyll+0.792Phenol -1.225Protein+1.901Carbohydrate Aphid= 1.141+3.934Chlorophyll-2.427Phenol-5.708Protein +5.726Carbohydrate Thrips = -0.825-0.070Chlorophyll+0.787Phenol-0.252Protein +2.620Carbohydrate	0.13
8th crop	Biochemical predictors	Ant guild	Ant= 0.450+0.897 Chlorophyll-0.152Phenol-1.077Protein+0.461Carbohydrate	0.258
8th crop	Biochemical predictors	Chewing guild	Epilachna beetle= 0.936-0.195Chlorophyll-0.726Phenol-0.873Protein+0.649Carbohydrate Flea beetle = 0.496-0.042 Chlorophyll-0.267Phenol+1.089Protein-0.952Carbohydrate BSFB = -.198+0.457Chlorophyll+0.351Phenol+0.568Protein+ 0.574Carbohydrate	0.673
8th crop	Biochemical predictors	Predatory guild	Lady bird beetle = 0.364-0.105Chlorophyll-0.150Phenol-1.137Protein+1.151Carbohydrate Spider = 0.355-0.118 Chlorophyll-0.114Phenol+0.236Protein-0.116Carbohydrate	0.418
8th crop	Biochemical predictors	Sucking guild	Mealybug= 0.300+0.078Chlorophyll-0.099Phenol+0.028Protein-0.122Carbohydrate Whitefly = 0.973+1.121Chlorophyll-0.962Phenol+0.374Protein-0.959Carbohydrate Jassid = 0.739-0.422Chlorophyll-0.289Phenol-3.908Protein+4.355Carbohydrate Aphid = 3.624+2.752Chlorophyll-3.465Phenol+8.483Protein-10.101Carbohydrate Thrips = 2.628+0.961Chlorophyll-2.718Phenol+3.852Protein-4.117Carbohydrate	0.196
9th crop	Biochemical predictors	Ant guild	Ant = 0.918+0.545Chlorophyll+0.001Phenol-0.454Protein-0.677Carbohydrate	0.592
9th crop	Biochemical predictors	Chewing guild	Epilachna beetle = 0.502-0.133Chlorophyll-0.173Phenol+0.055Protein-0.135Carbohydrate Flea beetle = 0.229-0.001Chlorophyll+0.171Phenol+0.274Protein-0.221Carbohydrate BSFB = -0.577+0.757Chlorophyll+0.756Phenol+0.644Protein+0.090 Carbohydrate	0.223
9th crop	Biochemical predictors	Predatory guild	Lady bird beetle = 0.456+0.182Chlorophyll-0.143Phenol+0.553Protein-0.777Carbohydrate Spider= 0.284+0.261Chlorophyll+0.033Phenol+0.153Protein-0.369Carbohydrate	0.29
9th crop	Biochemical predictors	Sucking guild	Whitefly = 1.206+1.739Chlorophyll-0.400Phenol+2.268Protein-3.084Carbohydrate Jassid= 0.389+0.696Chlorophyll-0.128Phenol+0.050Protein+0.069Carbohydrate Aphid = 0.768+1.420Chlorophyll+0.039Phenol+0.562Protein-0.378Carbohydrate Thrips = -1.450+1.935Chlorophyll+1.304Phenol+0.032Protein+ 2.206Carbohydrate	0.649
10th crop	Biochemical predictors	Ant guild	Ant = 0.385+0.767Chlorophyll+0.366Phenol-0.294Protein-0.547Carbohydrate	0.143
10th crop	Biochemical predictors	Chewing guild	Epilachna beetle = 0.236+0.259Chlorophyll-0.071Phenol-0.094Protein+0.129Carbohydrate Flea beetle = 0.330-0.048Chlorophyll-0.065Phenol+0.276Protein+0.094Carbohydrate BSFB = -0.261+0.166Chlorophyll+0.223Phenol+0.296Protein+ 1.623Carbohydrate	0.103
10th crop	Biochemical predictors	Predatory guild	Lady bird beetle = -0.028+0.742Chlorophyll-0.007Phenol-0.777Protein+0.592Carbohydrate Spider = 0.367-0.056Chlorophyll-0.151Phenol+0.184Protein-0.093Carbohydrate	0.565
10th crop	Biochemical predictors	Sucking guild	Whitefly = 1.178+1.317Chlorophyll-0.587Phenol+1.215Protein-1.092Carbohydrate Jassid = 0.999+0.090Chlorophyll-0.884Phenol+0.564Protein+0.631Carbohydrate Aphid = 4.772+3.672Chlorophyll-3.716Phenol+4.261Protein-9.467Carbohydrate Thrips= 0.336+3.805Chlorophyll-0.745Phenol+3.388Protein-1.072Carbohydrate	0.483
11th crop	Biochemical predictors	Ant guild	Ant = 9.161+68.891Chlorophyll+0.840Phenol-6.188Protein+5.109Carbohydrate	0.27
11th crop	Biochemical predictors	Chewing guild	Epilachna beetle = 11.398+79.881Chlorophyll+1.698Phenol+6.263Protein+8.116Carbohydrate Flea beetle = 2.660+2.836Chlorophyll-9.909Phenol-3.287Protein+1.406Carbohydrate BSFB = 18.028+81.572Chlorophyll+0.408Phenol+15.161Protein-17.099Carbohydrate	0.82
11th crop	Biochemical predictors	Predatory guild	Lady bird beetle = 2.880+7.462Chlorophyll-0.695Phenol+2.387Protein-5.051Carbohydrate Spider = 8.473+73.766Chlorophyll+3.190Phenol-3.634Protein+9.382Carbohydrate	0.137
11th crop	Biochemical predictors	Sucking guild	Mealybug = -3.785-30.632Chlorophyll-0.322Phenol+1.935Protein-1.790Carbohydrate Whitefly = 27.045+109.173Chlorophyll-9.297Phenol+10.543Protein-28.815Carbohydrate Jassid = 21.132+26.962Chlorophyll-42.237Phenol+6.027Protein-26.610Carbohydrate Aphid = 15.838+87.384Chlorophyll-0.026Phenol+5.130Protein-7.991Carbohydrate Thrips = 54.625+250.344Chlorophyll-49.721Phenol-1.818Protein-19.959Carbohydrate	0.437
1st crop	Physico-morphic predictors	Ant guild	Ant = 1.539-1.549PH-0.770UG-0.596IL-0.033T+0.565LT-0.715LA-0.738FL+0.778FG+1.500P	0.757
1st crop	Physico-morphic predictors	Chewing guild	Epilachna beetle = 0.175+2.338PH-1.132UG+1.0244IL-0.454T-1.705LT+1.852LA-0.410FL-0.816FG+0.732P Flea beetle = -0.108+1.102PH+0.340UG+0.364IL-0.302T+0.337LT+0.139LA-0.067FL-0.677FG-0.178P BSFB = 1.688-1.134PH+0.298UG+0.997IL+0.147T-1.131LT-1.223LA-0.733FL+0.539FG+1.209P Leaf roller = 0.450-0.032PH+0.368UG+0.264IL+0.240T+0.657LT-0.690LA-0.575FL+0.152FG-0.544P	0.33
1st crop	Physico-morphic predictors	Predatory guild	Lady bird beetle = 1.656-5.990PH-0.644UG+2.410IL+2.296T+0.797LT-1.346LA-8.590FL+5.183FG+3.682P Spider = 0.953-1.075PH-0.342UG+0.030IL+0.514T+0.024LT-0.425LA-1.264FL+1.159FG+0.561P	0.434
1st crop	Physico-morphic predictors	Sucking guild	Mealybug = 5.457-10.742PH+0.362UG+0.4162IL+4.66T+1.416LT-6.249LA-0.763FL-2.561FG+7.730P Whitefly = 0.198+1.978PH+0.0203UG+0.0877IL-0.511T+0.460LT+0.686LA+0.116FL-0.602FG-0.883P Jassid= 0.768-0.242PH-0.209UG-0.163IL-0.127T-0.140LT-0.415LA+0.355FL-0.156FG+0.535P Aphid = 3.906-6.356PH-0.234UG-6.481IL+4.656T-1.313LT-2.935LA+4.014FL+4.129FG-0.745P	0.496
2nd crop	Physico-morphic predictors	Ant guild	Ant = 0.728-2.045PH+0.264UG-0.172IL-1.126T+0.186LTs-0.537LA+0.919FL+0.414FG+0.874P	0.434
2nd crop	Physico-morphic predictors	Chewing guild	Epilachna beetle=-0.595+1.348PH+0.449UG+1.162IL-0.964T+0.246LT+0.774LA+0.393FL-0.035FG-0.505P Flea beetle = 0.655-0.637PH+0.114UG-0.117IL+0.285T-0.107LT-0.444LA-0.201FL-0.005FG+0.296P BSFB = -0.68+1.055PH+0.364UG+0.852IL-1.250T-0.246LT+1.123LA-0.770FL+0.846FG+0.007P	0.867
2nd crop	Physico-morphic predictors	Predatory guild	Lady bird beetle = 3.320-5.460PH-0.803UG-2.944IL-0.559T+1.162LT-3.762LA+0.436FL-0.149FG+6.206P Spider = -0.384+0.608Ph+0.491UG+1.240IL+0.952T+0.0815LT+0.456LA+0.483FL-1.452FG-0.902P	0.561
2nd crop	Physico-morphic predictors	Sucking guild	Mealybug = 0.875-2.769PH+0.370UG-1.510IL-3.487T+0.730LT-0.573LA+0.026FL+3.583FG+3.127P Whitefly = 3.68+1.625PH-1.43UG-6.59IL+16.412T+2.725LT-5.125LA-14.666FL+2.606FG+2.628P Jassid = 2.058-1.474PH-0.550UG-1.342IL-0.765T-0.306LT-1.818LA-0.397FL+2.076FG+1.666P Aphid = -0.973+0.946PHt+0.547UG+1.250IL-1.789T-0.020LT+1.396LA+1.133FL-0.324FG-0.678P	0.8
3rd crop	Physico-morphic predictors	Ant guild	Ant = 0.680-1.189Ph+1.597UG+0.100IL+0.0335T-0.449LT-0.225LA+0.158FL-0.207FG-0.391P	0.486
3rd crop	Physico-morphic predictors	Chewing guild	Epilachna beetle = -0.158+0.435PH-0.557UG-0.717IL-0.210T+0.002LT+1.026LA-0.046FL+1.307FG-0.221P Flea beetle = 0.200+0.506PH-0.509UG+0.344IL-0.283T+0.3516LT+0.488LA-0.630FL-0.077FG+0.454P BFSB = 2.076-5.780PH+2.211UG-1.263IL+3.946T-0.268LT-4.216LA+0.793FL-1.86FG+2.482P	0.936
3rd crop	Physico-morphic predictors	Predatory guild	Lady bird beetle = 0.140+0.446PH+0.105UG-0.551IL-1.270T+0.252LT+0.327LA-1.621FL+1.424FG+1.186P Spider = 0.638-0.539PH+0.443UG-0.588IL+0.551T+0.117LTs-0.578LA-0.866FL-0.319FG+1.439P	0.479
3rd crop	Physico-morphic predictors	Sucking guild	Whitefly = 0.858-1.904PH+1.594UG-0.636IL+2.842T-0.145LT-0.824LA-0.789FL+1.664FG-2.113P Jassid = 0.767-2.393PH+0.574UG-0.393IL+3.0529T-0.177LT-0.859LA+0.983FL+0.514FG-1.299P Aphid = 3.017+6.851PH+2.133UG-0.301IL-1.350T+0.480LT-4.789LA-8.756FL+4.000FG+1.834P Thrips = 1.63+7.386PH-1.418UG+0.009IL-0.169T+0.018LT-0.148LA-0.323FL-2.062FG-0.917P	0.75
4th crop	Physico-morphic predictors	Ant guild	Ant = 0.685-1.161PHt+0.503UG+0.478IL+0.254T+0.426LT-0.817LA-0.299FL-0.251FG+0.467P	0.531
4th crop	Physico-morphic predictors	Chewing guild	Epilachna beetle= 0.436+0.182PH+0.279UG-0.407IL+2.225T+0.462LT-0.783LA+1.768FL-2.160FG-1.629P Flea beetle = 0.935-2.085PH+0.215UG-0.417IL+2.510T+0.836LT-1.661LA-0.681FL+0.691FG-0.434P BSFB= -0.343+0.380PH+0.651UG-1.256IL+3.529T+0.984LT-0.038LA-6.043FL+3.332FG+0.164P	0.605
4th crop	Physico-morphic predictors	Predatory guild	Lady bird beetle = -0.275+0.379PH+0.081UG-0.395IL+0.097T-0.01LT+0.918LA+1.173FL+0.323FG-1.519P Spider = 0.649-0.633PH-0.403UG+0.283IL+0.595T+0.391LT-0.032LA+1.347FL-0.992FG-0.665P	0.783
4th crop	Physico-morphic predictors	Sucking guild	Whitefly= 2.084-2.048PH-0.007UG+0.072IL+1.787T+0.762LT-0.888LA+0.186FL-0.910FG+0.832P jassid = 0.697-0.159PH+1.824UG-0.288IL+0.509T+0.347LT-1.459LA+1.664FL-0.876FG-0.088P Aphid = 0.738+1.333PH+0.633UG-4.496IL+6.385T-0.323LT+0.363LA+0.062FL-7.418FG+5.886P Thrips= 3.543-10.745PH-0.560UG+1.272IL+13.599T+4.635LT-6.625LA+3.955FL-5.641FG-1.929P	0.368
5th crop	Physico-morphic predictors	Ant guild	Ant = 0.635+2.172PH-0.246UG-0.504IL+1.750T-0.376LT-0.105LA-0.119FL-2.195FG-0.554P	0.536
5th crop	Physico-morphic predictors	Chewing guild	Epilachna beetle = -0.619+3.801PH-0.0108UG-0.467IL-1.120T+1.384LT+0.900LA-1.564FL-0.335FG+0.748P Flea beetle = 1.374-0.494PH+0.088UG+0.208IG+2.526T-0.094LT-1.452LA+1.495FL-3.007FG-0.509P BSFB = -0.001+1.546PH-0.502UG-0.912IL-0.124T+0.083LT+0.611LA-2.027FL+2.024FG+0.825P	0.877
5th crop	Physico-morphic predictors	Predatory guild	Lady bird beetle = 0.557-0.591PH+0.0539UG-0.126IL+0.439T+0.276LT-0.454LA+0.462FL-0.556FG-0.024P Spider = 0.059+0.787PH+0.227UG-0.076IL+0.396T+0.044LT+0.066LA-1.257FL-0.375FG+1.003P	0.54
5th crop	Physico-morphic predictors	Sucking guild	Mealybug = 0.394-0.181PH-0.152UG-0.006IL+0.076T-0.191LT-0.150LA-0.071FL+0.699FG-0.350P Whitefly = 6.416-4.892PH+1.838UG-1.491IL+11.943T-1.2750LT-8.133LA+0.602FL-6.843FG-0.609P Jassid = 0.582+2.026PH+0.152UG-0.417IL+4.459T-2.611LT-0.245LA+4.283FL-5.664FG-0.502P Aphid = 0.171-1.315PH-0.487UG-0.306IL-1.098T+0.529LT+0.462LA-0.906FL+3.887FG-0.704P Thrips = 2.746+5.0405PH+0.444UG-4.108IL+12.786T-1.476L…	0.71
6th crop	Physico-morphic predictors	Ant guild	Ant = -0.834-0.282PH-0.505UG+0.791IL-3.474T-0.416LT+1.951LA-0.681FL+4.941FG+0.184P	0.668
6th crop	Physico-morphic predictors	Chewing guild	Epilachna beetle = 2.031-4.204PH+0.073UG+3.224IL+1.738T+0.325LT-1.719LA+3.330FL-0.7331FG-3.062P Flea beetle = -0.052+0.344PH+0.343UG-0.091IL-0.179T-0.469LT+0.289LA-0.609FL+0.573FG+0.352P BSFB = 0.285+0.396PH-0.103UG+0.012UG+0.612T-0.657LT+0.077LA-0.450FL+0.354FG+0.763P	0.669
6th crop	Physico-morphic predictors	Predatory guild	Lady bird beetle = 0.213-0.003PH-0.047UG-0.002IL-0.024T-0.023LT+0.037LA+0.025FL+0.093FG-0.024P Spider = 0.829-0.155PH-0.303UG-0.074IL+1.054T+0.318LT-0.619LA-0.109FL-0.365FG-0.506P	0.191
6th crop	Physico-morphic predictors	Sucking guild	Mealybug = -1.239+1.569PH+0.630UG-0.546IL-1.37T-1.23LT+1.843LA-2.927FL+0.261FG+4.291P Whitefly= -0.799+2.703PH+0.515UG+0.359IL-2.339T-1.609LT+1.694LA-1.230FL+2.494FG+0.009P Jassid = 0.812-1.234PH+0.385UG-0.736IL-0.855T+0.254LT-0.093LA-0.454FL+2.000FG-0.271P Aphid = 0.613-1.504PH-1.232UG+1.111IL+0.294T+0.770LT-0.379LA-2.434FL+1.453FG+1.601P	0.747
7th crop	Physico-morphic predictors	Ant guild	Ant = 1.130+0.442PH+0.131UG-1.313IL-2.424T+1.101LT+0.687LA-0.794FL-1.547FG+4.170P	0.35
7th crop	Physico-morphic predictors	Chewing guild	Epilachna beetle = 0.589-0.999PH+0.480UG+0.619IL-1.869T-0.937LT+0.102LA+1.782FL+1.864FG-1.024P Flea beetle = -0.238+1.479PH-0.430UG+0.107IL+1.822T+0.287LT+0.876LA-0.912FL-2.589FG+0.827P BSFB = 2.236-1.985PH-0.193UG-0.842IL+0.558T+0.322LT-1.774LA+0.137FL+2.403FG-1.555P	0.437
7th crop	Physico-morphic predictors	Predatory guild	Lady bird beetle = -0.034+0.823PH-0.111UG+0.012IL+0.708T+0.297LT+0.280LA+0.263FL-1.677FG+0.183P Spider = -0.353+0.636PH+0.006UG+0.659IL-0.441T-0.058LT+0.797LA-1.322FL+1.221FG-0.112P	0.529
7th crop	Physico-morphic predictors	Sucking guild	Mealybug = 0.382-0.159PH+0.032UG+0.032IL-0.0116T-0.232LT-0.167LA+0.297FL+0.120FG-0.169P Jassid = 1.702-2.809PH-0.523UG+0.701IL-0.089T+0.598LT-1.322LA+1.261FL-1.135FG+0.999P Whitefly = 1.684-0.571PH-0.444UG+0.581IL+1.991T+0.404LT-0.688LA+0.373FL-3.174FG+0.358P Aphid= -2.474+5.605PH-0.3683UG-1.898IL-1.779T+3.475LT+4.279LA-3.207FL+3.599FG-0.392P Thrips = -2.515+10.0156PH-0.656UG+1.001IL+8.355T+0.862…	0.173
8th crop	Physico-morphic predictors	Ant guild	Ant= -0.888+0.314PH-0.192UG-0.303IL-1.057T+0.588LT+1.900LA+0.095FL-0.302FG+1.704P	0.307
8th crop	Physico-morphic predictors	Chewing guild	Epilachna beetle= 0.412-0.528PH+0.007UG+0.111IL+0.853T-0.281LT-0.176LA-1.208FL+0.424FG+0.792P Flea beetle = 0.666-0.655PH+0.327UG-0.612IL+0.673T-0.465LT-0.548LA-0.861FL+0.251FG+1.193P BSFB = -0.067+1.069PH+0.0543UG-0.727IL+0.079T+0.263LT+0.326LA-0.310FL-1.426FG+2.249P	0.689
8th crop	Physico-morphic predictors	Predatory guild	Lady bird beetle = -0.016-0.211PH-0.200UG+0.279UG-0.599T+0.108LT+0.427LA-0.337FL+0.260FG+0.828P Spider = 0.330-0.072PH-0.0444UG+0.092IL+0.781T+0.111LT-0.252LA-0.311FL-0.766FG+0.473P	0.831
8th crop	Physico-morphic predictors	Sucking guild	Mealybug = 0.062+0.175PH+0.0215UG-0.187IL-0.182T-0.016LT+0.251LA+0.422FL-0.128FG-0.069P Whitefly = 0.772+0.359PH-0.191UG-0.786IL+3.404T+0.003LTs-0.756LA-0.291FL-1.186FG-0.537P Jassid= 1.523-3.694PH+0.186UG-0.183IL+2.446T+0.464LT-1.939LA-3.083FL+3.131FG+0.766P Aphid = 3.796+2.0895PH+1.634UG-2.169IL+11.781T-3.005LT-4.237LA-4.044FL-2.917FG-1.255P Thrips = 1.687-4.234PH+0.306UG+0.374IL+9.131T+2.107LT…	0.394
9th crop	Physico-morphic predictors	Ant guild	Ant = 0.015-0.405PH+0.922UG-1.264IL+0.904T+0.540LT+0.832LA+0.376FL-0.793FG+0.075P	0.737
9th crop	Physico-morphic predictors	Chewing guild	Epilachna beetle = 0.106-0.033PH+0.242UG-0.354IL+0.321T+0.019LT+0.167LA+0.111FL-0.252FG+0.108P Flea beetle = 0.463-0.189PH-0.518UG+0.119IL-0.609T+0.156LT+0.146LA-0.122FL+0.563FG+0.388P BSFB = 0.061-2.006PH+0.122UG+0.661IL-1.573T+0.019LT+0.455LA+4.491FL-0.466FG-0.389P	0.493
9th crop	Physico-morphic predictors	Predatory guild	Lady bird beetle = 0.594-0.165PHt+0.366UG+0.196IL+0.361T+0.338LT-0.817LA-2.470FL+0.801FG+0.754P Spider = -0.001+0.678PH-0.102UG+0.061IL+0.106T+0.219LT+0.470LA+0.774FL-1.012FG-0.310P	0.682
9th crop	Physico-morphic predictors	Sucking guild	Whitefly = 0.559+0.0617PH+1.678UG+0.236IL+3.158T+0.673LT-0.869LA+0.936FL-4.004FG+0.158P Jassid = -0.042-0.006PH-0.199UG+0.401IL-1.874T+0.290LT+0.9040LA-0.597FL+1.589FG+1.173P Aphid = -0.187-0.038PH+0.689UG-2.889IL-2.515T+0.965LT+1.614LA-2.868FL+6.904FG+0.473P Thrips = -0.081-5.700PH-0.670UG-0.011IL-4.765T+2.527LT+0.809LA+0.914FL+4.223FG+6.466P	0.689
10th crop	Physico-morphic predictors	Ant guild	Ant = 0.481+1.047PH-0.850UG+0.493IL+0.956T-0.299LT+0.810LA-1.934FL-0.844FG+1.159P	0.17
10th crop	Physico-morphic predictors	Chewing guild	Epilachna beetle= -0.079+2.903PH-0.703UG+0.648IL+3.053T-0.457LT+0.567LA-4.673FL-0.293FG+0.516P Flea beetle = -0.053+0.861PH+0.574UG-0.547IL+0.511T-0.006LT+0.004LA-1.165FL+1.335FG-0.700P BSFB= 1.278+1.133PH-0.947UG+1.643IL+0.698T+0.514LT-1.246LA-2.254FL-0.619FG+1.224P	0.572
10th crop	Physico-morphic predictors	Predatory guild	Lady bird beetle = 0.285+0.419PH-0.490UG+0.175IL+0.472T+0.644LT+0.0768LA-1.425FL-0.128FG+0.739P Spider= 0.318+0.735PH-0.243UG+0.628IL+1.776T-0.069LT-0.211LA-1.652FL-0.926FG+0.345P	0.637
10th crop	Physico-morphic predictors	Sucking guild	Whitefly = 1.592-2.079PH+0.601UG+1.018IL+0.713T+1.355LT-1.730LA+0.783FL+1.326FG-1.887P Jassid= 1.797-4.232PH+0.458UG+0.133IL-4.216T+0.070LT-1.750LA+4.451FL+2.963FG-0.051P Aphid = 0.312+1.483PH-2.627UG+0.584IL+10.466T-1.228LT+2.389LA-4.571FL-2.018FG-1.033P Thrips = 4.309-8.089PH+2.997UG+2.911IL-3.171T+7.504LT-8.118LA+8.981FL-3.693FG-0.132P	0.71
11th crop	Physico-morphic predictors	Ant guild	Ant = -380.701+7.833PH-91.148UG-1.484IL-0.699T-2119.41LT+0.057LA+37.844FL-3.001FG+0.402P	0.576
11th crop	Physico-morphic predictors	Chewing guild	Epilachna beetle = -76.170+2.896PH-28.213UG+2.268IL-0.422T-500.035LT+0.021LA+51.938FL-14.077FG+42.605P Flea beetle = -218.233+6.178PH-69.902UG+5.428IL-0.469T-117LT+0.042LA+8.301FL+3.928FG-16.674P BSFB = 105.003-1.795PH+10.120UG-7.749IL+0.401T+588.541LT-0.023LA-17.718FL-1.155FG+24.502P	0.897
11th crop	Physico-morphic predictors	Predatory guild	Lady bird beetle = 73.828+0.072PH+9.852UG+3.295IL+0.175T+433.166LT-0.004LA-4.901FL-1.643FG-13.562P Spider = -86.383+1.725PH-15.041UG+2.018IL-0.089T-467.744LT+0.001LA-4.240FL+4.868FG-19.140P	0.638
11th crop	Physico-morphic predictors	Sucking guild	Mealybug = -12.886+0.293PH-6.382UG+0.406IL-0.059T-81.170LT+0.004LA+2.332FL-1.063FG+10.306P Whitefly = -349.742+9.158PH-48.736UG+27.014IL+0.153T-18LT+0.034LA-46.368FL+5.175FG-6.739P Jassid = -399.820+5.986PH-59.211UG-10.335IL-0.218T-220LT+0.046LA+23.949FL+3.164FG-16.223P Aphid = 18.556-0.475PH+9.387UG-4.889IL-0.029T+92.000LT-0.001LA-7.266FL+2.382FG+11.9516P Thrips = -39.107+7.232PH-81.018UG-15.558…	0.619

## Sheet: S5_Partial_correlations
Table S5. Complete partial-correlation matrix among arthropods after controlling host-plant traits.
Partial correlations identify arthropod associations retained after physico-morphic or biochemical trait control and help separate direct guild coupling from plant-mediated co-occurrence.
Crop	Control set	Arthropod 1	Guild 1	Arthropod 2	Guild 2	Arthropod pair	Partial r	Significance	Direction	Strength
1st crop	Biochemical controlled	Ant	Ant guild	Aphid	Sucking guild	Ant | Aphid	0.245	ns	positive	weak
1st crop	Biochemical controlled	Ant	Ant guild	BSFB	Chewing guild	Ant | BSFB	0.109	ns	positive	weak
1st crop	Biochemical controlled	Ant	Ant guild	Epilachna beetle	Chewing guild	Ant | Epilachna beetle	0.179	ns	positive	weak
1st crop	Biochemical controlled	Ant	Ant guild	Flea beetle	Chewing guild	Ant | Flea beetle	-0.408	ns	negative	weak-to-moderate
1st crop	Biochemical controlled	Ant	Ant guild	Jassid	Sucking guild	Ant | Jassid	0.447	ns	positive	weak-to-moderate
1st crop	Biochemical controlled	Ant	Ant guild	Lady bird beetle	Predatory guild	Ant | Lady bird beetle	-0.011	ns	negative	weak
1st crop	Biochemical controlled	Ant	Ant guild	Leaf roller	Chewing guild	Ant | Leaf roller	0.41	ns	positive	weak-to-moderate
1st crop	Biochemical controlled	Ant	Ant guild	Mealybug	Sucking guild	Ant | Mealybug	0.575	*	positive	moderate
1st crop	Biochemical controlled	Ant	Ant guild	Spider	Predatory guild	Ant | Spider	0.483	ns	positive	weak-to-moderate
1st crop	Biochemical controlled	Ant	Ant guild	Whitefly	Sucking guild	Ant | Whitefly	0.014	ns	positive	weak
1st crop	Biochemical controlled	Epilachna beetle	Chewing guild	Aphid	Sucking guild	Aphid | Epilachna beetle	-0.349	ns	negative	weak-to-moderate
1st crop	Biochemical controlled	Flea beetle	Chewing guild	Aphid	Sucking guild	Aphid | Flea beetle	-0.106	ns	negative	weak
1st crop	Biochemical controlled	Aphid	Sucking guild	Jassid	Sucking guild	Aphid | Jassid	0.468	ns	positive	weak-to-moderate
1st crop	Biochemical controlled	Lady bird beetle	Predatory guild	Aphid	Sucking guild	Aphid | Lady bird beetle	-0.34	ns	negative	weak-to-moderate
1st crop	Biochemical controlled	Leaf roller	Chewing guild	Aphid	Sucking guild	Aphid | Leaf roller	-0.125	ns	negative	weak
1st crop	Biochemical controlled	Aphid	Sucking guild	Mealybug	Sucking guild	Aphid | Mealybug	0.295	ns	positive	weak
1st crop	Biochemical controlled	Spider	Predatory guild	Aphid	Sucking guild	Aphid | Spider	0.038	ns	positive	weak
1st crop	Biochemical controlled	Aphid	Sucking guild	Whitefly	Sucking guild	Aphid | Whitefly	-0.053	ns	negative	weak
1st crop	Biochemical controlled	Lady bird beetle	Predatory guild	BSFB	Chewing guild	BSFB | Lady bird beetle	0.196	ns	positive	weak
1st crop	Biochemical controlled	Leaf roller	Chewing guild	BSFB	Chewing guild	BSFB | Leaf roller	0.184	ns	positive	weak
1st crop	Biochemical controlled	Spider	Predatory guild	BSFB	Chewing guild	BSFB | Spider	0.374	ns	positive	weak-to-moderate
1st crop	Biochemical controlled	Flea beetle	Chewing guild	Epilachna beetle	Chewing guild	Epilachna beetle | Flea beetle	0.184	ns	positive	weak
1st crop	Biochemical controlled	Epilachna beetle	Chewing guild	Jassid	Sucking guild	Epilachna beetle | Jassid	0.002	ns	positive	weak
1st crop	Biochemical controlled	Lady bird beetle	Predatory guild	Epilachna beetle	Chewing guild	Epilachna beetle | Lady bird beetle	0.122	ns	positive	weak
1st crop	Biochemical controlled	Leaf roller	Chewing guild	Epilachna beetle	Chewing guild	Epilachna beetle | Leaf roller	-0.205	ns	negative	weak
1st crop	Biochemical controlled	Epilachna beetle	Chewing guild	Mealybug	Sucking guild	Epilachna beetle | Mealybug	-0.229	ns	negative	weak
1st crop	Biochemical controlled	Spider	Predatory guild	Epilachna beetle	Chewing guild	Epilachna beetle | Spider	0.558	*	positive	moderate
1st crop	Biochemical controlled	Epilachna beetle	Chewing guild	Whitefly	Sucking guild	Epilachna beetle | Whitefly	-0.173	ns	negative	weak
1st crop	Biochemical controlled	Flea beetle	Chewing guild	Jassid	Sucking guild	Flea beetle | Jassid	0.144	ns	positive	weak
1st crop	Biochemical controlled	Lady bird beetle	Predatory guild	Flea beetle	Chewing guild	Flea beetle | Lady bird beetle	-0.172	ns	negative	weak
1st crop	Biochemical controlled	Leaf roller	Chewing guild	Flea beetle	Chewing guild	Flea beetle | Leaf roller	-0.168	ns	negative	weak
1st crop	Biochemical controlled	Flea beetle	Chewing guild	Mealybug	Sucking guild	Flea beetle | Mealybug	-0.267	ns	negative	weak
1st crop	Biochemical controlled	Spider	Predatory guild	Flea beetle	Chewing guild	Flea beetle | Spider	0.009	ns	positive	weak
1st crop	Biochemical controlled	Flea beetle	Chewing guild	Whitefly	Sucking guild	Flea beetle | Whitefly	-0.266	ns	negative	weak
1st crop	Biochemical controlled	Lady bird beetle	Predatory guild	Jassid	Sucking guild	Jassid | Lady bird beetle	-0.45	ns	negative	weak-to-moderate
1st crop	Biochemical controlled	Leaf roller	Chewing guild	Jassid	Sucking guild	Jassid | Leaf roller	-0.08	ns	negative	weak
1st crop	Biochemical controlled	Jassid	Sucking guild	Mealybug	Sucking guild	Jassid | Mealybug	0.334	ns	positive	weak-to-moderate
1st crop	Biochemical controlled	Spider	Predatory guild	Jassid	Sucking guild	Jassid | Spider	0.122	ns	positive	weak
1st crop	Biochemical controlled	Jassid	Sucking guild	Whitefly	Sucking guild	Jassid | Whitefly	-0.118	ns	negative	weak
1st crop	Biochemical controlled	Lady bird beetle	Predatory guild	Leaf roller	Chewing guild	Lady bird beetle | Leaf roller	-0.001	ns	negative	weak
1st crop	Biochemical controlled	Lady bird beetle	Predatory guild	Mealybug	Sucking guild	Lady bird beetle | Mealybug	0.153	ns	positive	weak
1st crop	Biochemical controlled	Spider	Predatory guild	Lady bird beetle	Predatory guild	Lady bird beetle | Spider	0.36	ns	positive	weak-to-moderate
1st crop	Biochemical controlled	Lady bird beetle	Predatory guild	Whitefly	Sucking guild	Lady bird beetle | Whitefly	-0.089	ns	negative	weak
1st crop	Biochemical controlled	Leaf roller	Chewing guild	Mealybug	Sucking guild	Leaf roller | Mealybug	0.668	**	positive	moderate
1st crop	Biochemical controlled	Spider	Predatory guild	Leaf roller	Chewing guild	Leaf roller | Spider	0.053	ns	positive	weak
1st crop	Biochemical controlled	Leaf roller	Chewing guild	Whitefly	Sucking guild	Leaf roller | Whitefly	0.01	ns	positive	weak
1st crop	Biochemical controlled	Spider	Predatory guild	Mealybug	Sucking guild	Mealybug | Spider	0.129	ns	positive	weak
1st crop	Biochemical controlled	Whitefly	Sucking guild	Mealybug	Sucking guild	Mealybug | Whitefly	0.051	ns	positive	weak
1st crop	Biochemical controlled	Spider	Predatory guild	Whitefly	Sucking guild	Spider | Whitefly	-0.303	ns	negative	weak-to-moderate
2nd crop	Biochemical controlled	Ant	Ant guild	Aphid	Sucking guild	Ant | Aphid	0.411	ns	positive	weak-to-moderate
2nd crop	Biochemical controlled	Ant	Ant guild	BSFB	Chewing guild	Ant | BSFB	0.217	ns	positive	weak
2nd crop	Biochemical controlled	Ant	Ant guild	Epilachna beetle	Chewing guild	Ant | Epilachna beetle	0.314	ns	positive	weak-to-moderate
2nd crop	Biochemical controlled	Ant	Ant guild	Flea beetle	Chewing guild	Ant | Flea beetle	0.486	ns	positive	weak-to-moderate
2nd crop	Biochemical controlled	Ant	Ant guild	Jassid	Sucking guild	Ant | Jassid	-0.046	ns	negative	weak
2nd crop	Biochemical controlled	Ant	Ant guild	Lady bird beetle	Predatory guild	Ant | Lady bird beetle	0.246	ns	positive	weak
2nd crop	Biochemical controlled	Ant	Ant guild	Leaf roller	Chewing guild	Ant | Leaf roller	-0.329	ns	negative	weak-to-moderate
2nd crop	Biochemical controlled	Ant	Ant guild	Mealybug	Sucking guild	Ant | Mealybug	0.172	ns	positive	weak
2nd crop	Biochemical controlled	Ant	Ant guild	Spider	Predatory guild	Ant | Spider	0.311	ns	positive	weak-to-moderate
2nd crop	Biochemical controlled	Ant	Ant guild	Spodoptera sp.	Chewing guild	Ant | Spodoptera sp.	-0.16	ns	negative	weak
2nd crop	Biochemical controlled	Ant	Ant guild	Whitefly	Sucking guild	Ant | Whitefly	0.195	ns	positive	weak
2nd crop	Biochemical controlled	Epilachna beetle	Chewing guild	Aphid	Sucking guild	Aphid | Epilachna beetle	0.542	*	positive	moderate
2nd crop	Biochemical controlled	Flea beetle	Chewing guild	Aphid	Sucking guild	Aphid | Flea beetle	0.18	ns	positive	weak
2nd crop	Biochemical controlled	Aphid	Sucking guild	Jassid	Sucking guild	Aphid | Jassid	0.051	ns	positive	weak
2nd crop	Biochemical controlled	Lady bird beetle	Predatory guild	Aphid	Sucking guild	Aphid | Lady bird beetle	0.297	ns	positive	weak
2nd crop	Biochemical controlled	Leaf roller	Chewing guild	Aphid	Sucking guild	Aphid | Leaf roller	-0.306	ns	negative	weak-to-moderate
2nd crop	Biochemical controlled	Aphid	Sucking guild	Mealybug	Sucking guild	Aphid | Mealybug	0.264	ns	positive	weak
2nd crop	Biochemical controlled	Spider	Predatory guild	Aphid	Sucking guild	Aphid | Spider	0.357	ns	positive	weak-to-moderate
2nd crop	Biochemical controlled	Spodoptera sp.	Chewing guild	Aphid	Sucking guild	Aphid | Spodoptera sp.	0.197	ns	positive	weak
2nd crop	Biochemical controlled	Aphid	Sucking guild	Whitefly	Sucking guild	Aphid | Whitefly	0.035	ns	positive	weak
2nd crop	Biochemical controlled	Lady bird beetle	Predatory guild	BSFB	Chewing guild	BSFB | Lady bird beetle	-0.034	ns	negative	weak
2nd crop	Biochemical controlled	Leaf roller	Chewing guild	BSFB	Chewing guild	BSFB | Leaf roller	-0.032	ns	negative	weak
2nd crop	Biochemical controlled	Spider	Predatory guild	BSFB	Chewing guild	BSFB | Spider	0.43	ns	positive	weak-to-moderate
2nd crop	Biochemical controlled	Spodoptera sp.	Chewing guild	BSFB	Chewing guild	BSFB | Spodoptera sp.	-0.1	ns	negative	weak
2nd crop	Biochemical controlled	Flea beetle	Chewing guild	Epilachna beetle	Chewing guild	Epilachna beetle | Flea beetle	-0.256	ns	negative	weak
2nd crop	Biochemical controlled	Epilachna beetle	Chewing guild	Jassid	Sucking guild	Epilachna beetle | Jassid	-0.069	ns	negative	weak
2nd crop	Biochemical controlled	Lady bird beetle	Predatory guild	Epilachna beetle	Chewing guild	Epilachna beetle | Lady bird beetle	0.036	ns	positive	weak
2nd crop	Biochemical controlled	Leaf roller	Chewing guild	Epilachna beetle	Chewing guild	Epilachna beetle | Leaf roller	0.116	ns	positive	weak
2nd crop	Biochemical controlled	Epilachna beetle	Chewing guild	Mealybug	Sucking guild	Epilachna beetle | Mealybug	-0.047	ns	negative	weak
2nd crop	Biochemical controlled	Spider	Predatory guild	Epilachna beetle	Chewing guild	Epilachna beetle | Spider	0.422	ns	positive	weak-to-moderate
2nd crop	Biochemical controlled	Spodoptera sp.	Chewing guild	Epilachna beetle	Chewing guild	Epilachna beetle | Spodoptera sp.	-0.046	ns	negative	weak
2nd crop	Biochemical controlled	Epilachna beetle	Chewing guild	Whitefly	Sucking guild	Epilachna beetle | Whitefly	0.22	ns	positive	weak
2nd crop	Biochemical controlled	Flea beetle	Chewing guild	Jassid	Sucking guild	Flea beetle | Jassid	-0.041	ns	negative	weak
2nd crop	Biochemical controlled	Lady bird beetle	Predatory guild	Flea beetle	Chewing guild	Flea beetle | Lady bird beetle	-0.01	ns	negative	weak
2nd crop	Biochemical controlled	Leaf roller	Chewing guild	Flea beetle	Chewing guild	Flea beetle | Leaf roller	-0.066	ns	negative	weak
2nd crop	Biochemical controlled	Flea beetle	Chewing guild	Mealybug	Sucking guild	Flea beetle | Mealybug	-0.083	ns	negative	weak
2nd crop	Biochemical controlled	Spider	Predatory guild	Flea beetle	Chewing guild	Flea beetle | Spider	0.026	ns	positive	weak
2nd crop	Biochemical controlled	Spodoptera sp.	Chewing guild	Flea beetle	Chewing guild	Flea beetle | Spodoptera sp.	0.053	ns	positive	weak
2nd crop	Biochemical controlled	Flea beetle	Chewing guild	Whitefly	Sucking guild	Flea beetle | Whitefly	0.221	ns	positive	weak
2nd crop	Biochemical controlled	Lady bird beetle	Predatory guild	Jassid	Sucking guild	Jassid | Lady bird beetle	0.426	ns	positive	weak-to-moderate
2nd crop	Biochemical controlled	Leaf roller	Chewing guild	Jassid	Sucking guild	Jassid | Leaf roller	-0.683	**	negative	moderate
2nd crop	Biochemical controlled	Jassid	Sucking guild	Mealybug	Sucking guild	Jassid | Mealybug	0.383	ns	positive	weak-to-moderate
2nd crop	Biochemical controlled	Spider	Predatory guild	Jassid	Sucking guild	Jassid | Spider	-0.562	*	negative	moderate
2nd crop	Biochemical controlled	Spodoptera sp.	Chewing guild	Jassid	Sucking guild	Jassid | Spodoptera sp.	-0.664	**	negative	moderate
2nd crop	Biochemical controlled	Jassid	Sucking guild	Whitefly	Sucking guild	Jassid | Whitefly	-0.726	**	negative	strong
2nd crop	Biochemical controlled	Lady bird beetle	Predatory guild	Leaf roller	Chewing guild	Lady bird beetle | Leaf roller	-0.372	ns	negative	weak-to-moderate
2nd crop	Biochemical controlled	Lady bird beetle	Predatory guild	Mealybug	Sucking guild	Lady bird beetle | Mealybug	0.75	**	positive	strong
2nd crop	Biochemical controlled	Spider	Predatory guild	Lady bird beetle	Predatory guild	Lady bird beetle | Spider	-0.258	ns	negative	weak
2nd crop	Biochemical controlled	Lady bird beetle	Predatory guild	Spodoptera sp.	Chewing guild	Lady bird beetle | Spodoptera sp.	-0.079	ns	negative	weak
2nd crop	Biochemical controlled	Lady bird beetle	Predatory guild	Whitefly	Sucking guild	Lady bird beetle | Whitefly	-0.118	ns	negative	weak
2nd crop	Biochemical controlled	Leaf roller	Chewing guild	Mealybug	Sucking guild	Leaf roller | Mealybug	-0.495	ns	negative	weak-to-moderate
2nd crop	Biochemical controlled	Spider	Predatory guild	Leaf roller	Chewing guild	Leaf roller | Spider	0.143	ns	positive	weak
2nd crop	Biochemical controlled	Leaf roller	Chewing guild	Spodoptera sp.	Chewing guild	Leaf roller | Spodoptera sp.	0.535	*	positive	moderate
2nd crop	Biochemical controlled	Leaf roller	Chewing guild	Whitefly	Sucking guild	Leaf roller | Whitefly	0.511	*	positive	moderate
2nd crop	Biochemical controlled	Spider	Predatory guild	Mealybug	Sucking guild	Mealybug | Spider	-0.056	ns	negative	weak
2nd crop	Biochemical controlled	Spodoptera sp.	Chewing guild	Mealybug	Sucking guild	Mealybug | Spodoptera sp.	-0.04	ns	negative	weak
2nd crop	Biochemical controlled	Whitefly	Sucking guild	Mealybug	Sucking guild	Mealybug | Whitefly	-0.233	ns	negative	weak
2nd crop	Biochemical controlled	Spider	Predatory guild	Spodoptera sp.	Chewing guild	Spider | Spodoptera sp.	0.267	ns	positive	weak
2nd crop	Biochemical controlled	Spider	Predatory guild	Whitefly	Sucking guild	Spider | Whitefly	0.509	*	positive	moderate
2nd crop	Biochemical controlled	Spodoptera sp.	Chewing guild	Whitefly	Sucking guild	Spodoptera sp. | Whitefly	0.521	*	positive	moderate
3rd crop	Biochemical controlled	Ant	Ant guild	Aphid	Sucking guild	Ant | Aphid	0.158	ns	positive	weak
3rd crop	Biochemical controlled	Ant	Ant guild	BSFB	Chewing guild	Ant | BSFB	0.105	ns	positive	weak
3rd crop	Biochemical controlled	Ant	Ant guild	Epilachna beetle	Chewing guild	Ant | Epilachna beetle	-0.185	ns	negative	weak
3rd crop	Biochemical controlled	Ant	Ant guild	Flea beetle	Chewing guild	Ant | Flea beetle	0.31	ns	positive	weak-to-moderate
3rd crop	Biochemical controlled	Ant	Ant guild	Jassid	Sucking guild	Ant | Jassid	0.136	ns	positive	weak
3rd crop	Biochemical controlled	Ant	Ant guild	Lady bird beetle	Predatory guild	Ant | Lady bird beetle	-0.025	ns	negative	weak
3rd crop	Biochemical controlled	Ant	Ant guild	Leaf roller	Chewing guild	Ant | Leaf roller	0.243	ns	positive	weak
3rd crop	Biochemical controlled	Ant	Ant guild	Spider	Predatory guild	Ant | Spider	0.16	ns	positive	weak
3rd crop	Biochemical controlled	Ant	Ant guild	Thrips	Sucking guild	Ant | Thrips	0.209	ns	positive	weak
3rd crop	Biochemical controlled	Ant	Ant guild	Whitefly	Sucking guild	Ant | Whitefly	0.321	ns	positive	weak-to-moderate
3rd crop	Biochemical controlled	Epilachna beetle	Chewing guild	Aphid	Sucking guild	Aphid | Epilachna beetle	-0.501	*	negative	moderate
3rd crop	Biochemical controlled	Flea beetle	Chewing guild	Aphid	Sucking guild	Aphid | Flea beetle	0.295	ns	positive	weak
3rd crop	Biochemical controlled	Aphid	Sucking guild	Jassid	Sucking guild	Aphid | Jassid	-0.226	ns	negative	weak
3rd crop	Biochemical controlled	Lady bird beetle	Predatory guild	Aphid	Sucking guild	Aphid | Lady bird beetle	0.467	ns	positive	weak-to-moderate
3rd crop	Biochemical controlled	Leaf roller	Chewing guild	Aphid	Sucking guild	Aphid | Leaf roller	0.286	ns	positive	weak
3rd crop	Biochemical controlled	Spider	Predatory guild	Aphid	Sucking guild	Aphid | Spider	0.192	ns	positive	weak
3rd crop	Biochemical controlled	Thrips	Sucking guild	Aphid	Sucking guild	Aphid | Thrips	0.421	ns	positive	weak-to-moderate
3rd crop	Biochemical controlled	Aphid	Sucking guild	Whitefly	Sucking guild	Aphid | Whitefly	0.226	ns	positive	weak
3rd crop	Biochemical controlled	Lady bird beetle	Predatory guild	BSFB	Chewing guild	BSFB | Lady bird beetle	-0.302	ns	negative	weak-to-moderate
3rd crop	Biochemical controlled	Leaf roller	Chewing guild	BSFB	Chewing guild	BSFB | Leaf roller	-0.065	ns	negative	weak
3rd crop	Biochemical controlled	Spider	Predatory guild	BSFB	Chewing guild	BSFB | Spider	0.151	ns	positive	weak
3rd crop	Biochemical controlled	Flea beetle	Chewing guild	Epilachna beetle	Chewing guild	Epilachna beetle | Flea beetle	-0.024	ns	negative	weak
3rd crop	Biochemical controlled	Epilachna beetle	Chewing guild	Jassid	Sucking guild	Epilachna beetle | Jassid	0.329	ns	positive	weak-to-moderate
3rd crop	Biochemical controlled	Lady bird beetle	Predatory guild	Epilachna beetle	Chewing guild	Epilachna beetle | Lady bird beetle	0.098	ns	positive	weak
3rd crop	Biochemical controlled	Leaf roller	Chewing guild	Epilachna beetle	Chewing guild	Epilachna beetle | Leaf roller	-0.181	ns	negative	weak
3rd crop	Biochemical controlled	Spider	Predatory guild	Epilachna beetle	Chewing guild	Epilachna beetle | Spider	0.065	ns	positive	weak
3rd crop	Biochemical controlled	Epilachna beetle	Chewing guild	Thrips	Sucking guild	Epilachna beetle | Thrips	-0.225	ns	negative	weak
3rd crop	Biochemical controlled	Epilachna beetle	Chewing guild	Whitefly	Sucking guild	Epilachna beetle | Whitefly	-0.019	ns	negative	weak
3rd crop	Biochemical controlled	Flea beetle	Chewing guild	Jassid	Sucking guild	Flea beetle | Jassid	0.27	ns	positive	weak
3rd crop	Biochemical controlled	Lady bird beetle	Predatory guild	Flea beetle	Chewing guild	Flea beetle | Lady bird beetle	0.584	*	positive	moderate
3rd crop	Biochemical controlled	Leaf roller	Chewing guild	Flea beetle	Chewing guild	Flea beetle | Leaf roller	0.036	ns	positive	weak
3rd crop	Biochemical controlled	Spider	Predatory guild	Flea beetle	Chewing guild	Flea beetle | Spider	0.405	ns	positive	weak-to-moderate
3rd crop	Biochemical controlled	Flea beetle	Chewing guild	Thrips	Sucking guild	Flea beetle | Thrips	-0.002	ns	negative	weak
3rd crop	Biochemical controlled	Flea beetle	Chewing guild	Whitefly	Sucking guild	Flea beetle | Whitefly	0.181	ns	positive	weak
3rd crop	Biochemical controlled	Lady bird beetle	Predatory guild	Jassid	Sucking guild	Jassid | Lady bird beetle	0.144	ns	positive	weak
3rd crop	Biochemical controlled	Leaf roller	Chewing guild	Jassid	Sucking guild	Jassid | Leaf roller	0.301	ns	positive	weak-to-moderate
3rd crop	Biochemical controlled	Spider	Predatory guild	Jassid	Sucking guild	Jassid | Spider	0.192	ns	positive	weak
3rd crop	Biochemical controlled	Thrips	Sucking guild	Jassid	Sucking guild	Jassid | Thrips	-0.469	ns	negative	weak-to-moderate
3rd crop	Biochemical controlled	Jassid	Sucking guild	Whitefly	Sucking guild	Jassid | Whitefly	0.496	ns	positive	weak-to-moderate
3rd crop	Biochemical controlled	Lady bird beetle	Predatory guild	Leaf roller	Chewing guild	Lady bird beetle | Leaf roller	0.276	ns	positive	weak
3rd crop	Biochemical controlled	Spider	Predatory guild	Lady bird beetle	Predatory guild	Lady bird beetle | Spider	0.631	**	positive	moderate
3rd crop	Biochemical controlled	Lady bird beetle	Predatory guild	Thrips	Sucking guild	Lady bird beetle | Thrips	-0.245	ns	negative	weak
3rd crop	Biochemical controlled	Lady bird beetle	Predatory guild	Whitefly	Sucking guild	Lady bird beetle | Whitefly	0.42	ns	positive	weak-to-moderate
3rd crop	Biochemical controlled	Spider	Predatory guild	Leaf roller	Chewing guild	Leaf roller | Spider	0.224	ns	positive	weak
3rd crop	Biochemical controlled	Leaf roller	Chewing guild	Thrips	Sucking guild	Leaf roller | Thrips	-0.24	ns	negative	weak
3rd crop	Biochemical controlled	Leaf roller	Chewing guild	Whitefly	Sucking guild	Leaf roller | Whitefly	0.293	ns	positive	weak
3rd crop	Biochemical controlled	Spider	Predatory guild	Thrips	Sucking guild	Spider | Thrips	-0.317	ns	negative	weak-to-moderate
3rd crop	Biochemical controlled	Spider	Predatory guild	Whitefly	Sucking guild	Spider | Whitefly	0.607	*	positive	moderate
3rd crop	Biochemical controlled	Thrips	Sucking guild	Whitefly	Sucking guild	Thrips | Whitefly	-0.416	ns	negative	weak-to-moderate
4th crop	Biochemical controlled	Ant	Ant guild	Aphid	Sucking guild	Ant | Aphid	-0.058	ns	negative	weak
4th crop	Biochemical controlled	Ant	Ant guild	BSFB	Chewing guild	Ant | BSFB	-0.022	ns	negative	weak
4th crop	Biochemical controlled	Ant	Ant guild	Epilachna beetle	Chewing guild	Ant | Epilachna beetle	0.199	ns	positive	weak
4th crop	Biochemical controlled	Ant	Ant guild	Flea beetle	Chewing guild	Ant | Flea beetle	0.012	ns	positive	weak
4th crop	Biochemical controlled	Ant	Ant guild	Jassid	Sucking guild	Ant | Jassid	-0.135	ns	negative	weak
4th crop	Biochemical controlled	Ant	Ant guild	Lady bird beetle	Predatory guild	Ant | Lady bird beetle	-0.559	*	negative	moderate
4th crop	Biochemical controlled	Ant	Ant guild	Spider	Predatory guild	Ant | Spider	-0.47	ns	negative	weak-to-moderate
4th crop	Biochemical controlled	Ant	Ant guild	Thrips	Sucking guild	Ant | Thrips	-0.222	ns	negative	weak
4th crop	Biochemical controlled	Ant	Ant guild	Whitefly	Sucking guild	Ant | Whitefly	0.057	ns	positive	weak
4th crop	Biochemical controlled	Epilachna beetle	Chewing guild	Aphid	Sucking guild	Aphid | Epilachna beetle	-0.045	ns	negative	weak
4th crop	Biochemical controlled	Flea beetle	Chewing guild	Aphid	Sucking guild	Aphid | Flea beetle	-0.209	ns	negative	weak
4th crop	Biochemical controlled	Aphid	Sucking guild	Jassid	Sucking guild	Aphid | Jassid	0.167	ns	positive	weak
4th crop	Biochemical controlled	Lady bird beetle	Predatory guild	Aphid	Sucking guild	Aphid | Lady bird beetle	-0.311	ns	negative	weak-to-moderate
4th crop	Biochemical controlled	Spider	Predatory guild	Aphid	Sucking guild	Aphid | Spider	0.031	ns	positive	weak
4th crop	Biochemical controlled	Thrips	Sucking guild	Aphid	Sucking guild	Aphid | Thrips	0.064	ns	positive	weak
4th crop	Biochemical controlled	Aphid	Sucking guild	Whitefly	Sucking guild	Aphid | Whitefly	0.324	ns	positive	weak-to-moderate
4th crop	Biochemical controlled	Lady bird beetle	Predatory guild	BSFB	Chewing guild	BSFB | Lady bird beetle	0.298	ns	positive	weak
4th crop	Biochemical controlled	Spider	Predatory guild	BSFB	Chewing guild	BSFB | Spider	0.204	ns	positive	weak
4th crop	Biochemical controlled	Flea beetle	Chewing guild	Epilachna beetle	Chewing guild	Epilachna beetle | Flea beetle	-0.003	ns	negative	weak
4th crop	Biochemical controlled	Epilachna beetle	Chewing guild	Jassid	Sucking guild	Epilachna beetle | Jassid	-0.233	ns	negative	weak
4th crop	Biochemical controlled	Lady bird beetle	Predatory guild	Epilachna beetle	Chewing guild	Epilachna beetle | Lady bird beetle	-0.252	ns	negative	weak
4th crop	Biochemical controlled	Spider	Predatory guild	Epilachna beetle	Chewing guild	Epilachna beetle | Spider	-0.268	ns	negative	weak
4th crop	Biochemical controlled	Epilachna beetle	Chewing guild	Thrips	Sucking guild	Epilachna beetle | Thrips	-0.467	ns	negative	weak-to-moderate
4th crop	Biochemical controlled	Epilachna beetle	Chewing guild	Whitefly	Sucking guild	Epilachna beetle | Whitefly	-0.557	*	negative	moderate
4th crop	Biochemical controlled	Flea beetle	Chewing guild	Jassid	Sucking guild	Flea beetle | Jassid	0.136	ns	positive	weak
4th crop	Biochemical controlled	Lady bird beetle	Predatory guild	Flea beetle	Chewing guild	Flea beetle | Lady bird beetle	0.086	ns	positive	weak
4th crop	Biochemical controlled	Spider	Predatory guild	Flea beetle	Chewing guild	Flea beetle | Spider	0.511	*	positive	moderate
4th crop	Biochemical controlled	Flea beetle	Chewing guild	Thrips	Sucking guild	Flea beetle | Thrips	0.664	**	positive	moderate
4th crop	Biochemical controlled	Flea beetle	Chewing guild	Whitefly	Sucking guild	Flea beetle | Whitefly	0.429	ns	positive	weak-to-moderate
4th crop	Biochemical controlled	Lady bird beetle	Predatory guild	Jassid	Sucking guild	Jassid | Lady bird beetle	0.28	ns	positive	weak
4th crop	Biochemical controlled	Spider	Predatory guild	Jassid	Sucking guild	Jassid | Spider	0.314	ns	positive	weak-to-moderate
4th crop	Biochemical controlled	Thrips	Sucking guild	Jassid	Sucking guild	Jassid | Thrips	0.389	ns	positive	weak-to-moderate
4th crop	Biochemical controlled	Jassid	Sucking guild	Whitefly	Sucking guild	Jassid | Whitefly	0.641	**	positive	moderate
4th crop	Biochemical controlled	Spider	Predatory guild	Lady bird beetle	Predatory guild	Lady bird beetle | Spider	0.284	ns	positive	weak
4th crop	Biochemical controlled	Lady bird beetle	Predatory guild	Thrips	Sucking guild	Lady bird beetle | Thrips	0.334	ns	positive	weak-to-moderate
4th crop	Biochemical controlled	Lady bird beetle	Predatory guild	Whitefly	Sucking guild	Lady bird beetle | Whitefly	0.137	ns	positive	weak
4th crop	Biochemical controlled	Spider	Predatory guild	Thrips	Sucking guild	Spider | Thrips	0.81	**	positive	strong
4th crop	Biochemical controlled	Spider	Predatory guild	Whitefly	Sucking guild	Spider | Whitefly	0.551	*	positive	moderate
4th crop	Biochemical controlled	Thrips	Sucking guild	Whitefly	Sucking guild	Thrips | Whitefly	0.826	**	positive	strong
5th crop	Biochemical controlled	Ant	Ant guild	Aphid	Sucking guild	Ant | Aphid	0.217	ns	positive	weak
5th crop	Biochemical controlled	Ant	Ant guild	BSFB	Chewing guild	Ant | BSFB	0.196	ns	positive	weak
5th crop	Biochemical controlled	Ant	Ant guild	Epilachna beetle	Chewing guild	Ant | Epilachna beetle	0.231	ns	positive	weak
5th crop	Biochemical controlled	Ant	Ant guild	Flea beetle	Chewing guild	Ant | Flea beetle	0.276	ns	positive	weak
5th crop	Biochemical controlled	Ant	Ant guild	Jassid	Sucking guild	Ant | Jassid	0.331	ns	positive	weak-to-moderate
5th crop	Biochemical controlled	Ant	Ant guild	Lady bird beetle	Predatory guild	Ant | Lady bird beetle	-0.311	ns	negative	weak-to-moderate
5th crop	Biochemical controlled	Ant	Ant guild	Mealybug	Sucking guild	Ant | Mealybug	0.109	ns	positive	weak
5th crop	Biochemical controlled	Ant	Ant guild	Spider	Predatory guild	Ant | Spider	-0.088	ns	negative	weak
5th crop	Biochemical controlled	Ant	Ant guild	Thrips	Sucking guild	Ant | Thrips	0.48	ns	positive	weak-to-moderate
5th crop	Biochemical controlled	Ant	Ant guild	Whitefly	Sucking guild	Ant | Whitefly	-0.152	ns	negative	weak
5th crop	Biochemical controlled	Epilachna beetle	Chewing guild	Aphid	Sucking guild	Aphid | Epilachna beetle	0.124	ns	positive	weak
5th crop	Biochemical controlled	Flea beetle	Chewing guild	Aphid	Sucking guild	Aphid | Flea beetle	-0.192	ns	negative	weak
5th crop	Biochemical controlled	Aphid	Sucking guild	Jassid	Sucking guild	Aphid | Jassid	-0.277	ns	negative	weak
5th crop	Biochemical controlled	Lady bird beetle	Predatory guild	Aphid	Sucking guild	Aphid | Lady bird beetle	0.035	ns	positive	weak
5th crop	Biochemical controlled	Aphid	Sucking guild	Mealybug	Sucking guild	Aphid | Mealybug	0.547	*	positive	moderate
5th crop	Biochemical controlled	Spider	Predatory guild	Aphid	Sucking guild	Aphid | Spider	-0.146	ns	negative	weak
5th crop	Biochemical controlled	Thrips	Sucking guild	Aphid	Sucking guild	Aphid | Thrips	0.087	ns	positive	weak
5th crop	Biochemical controlled	Aphid	Sucking guild	Whitefly	Sucking guild	Aphid | Whitefly	0.159	ns	positive	weak
5th crop	Biochemical controlled	Lady bird beetle	Predatory guild	BSFB	Chewing guild	BSFB | Lady bird beetle	0.169	ns	positive	weak
5th crop	Biochemical controlled	Spider	Predatory guild	BSFB	Chewing guild	BSFB | Spider	0.259	ns	positive	weak
5th crop	Biochemical controlled	Flea beetle	Chewing guild	Epilachna beetle	Chewing guild	Epilachna beetle | Flea beetle	-0.153	ns	negative	weak
5th crop	Biochemical controlled	Epilachna beetle	Chewing guild	Jassid	Sucking guild	Epilachna beetle | Jassid	-0.372	ns	negative	weak-to-moderate
5th crop	Biochemical controlled	Lady bird beetle	Predatory guild	Epilachna beetle	Chewing guild	Epilachna beetle | Lady bird beetle	-0.291	ns	negative	weak
5th crop	Biochemical controlled	Epilachna beetle	Chewing guild	Mealybug	Sucking guild	Epilachna beetle | Mealybug	-0.053	ns	negative	weak
5th crop	Biochemical controlled	Spider	Predatory guild	Epilachna beetle	Chewing guild	Epilachna beetle | Spider	0.093	ns	positive	weak
5th crop	Biochemical controlled	Epilachna beetle	Chewing guild	Thrips	Sucking guild	Epilachna beetle | Thrips	0.095	ns	positive	weak
5th crop	Biochemical controlled	Epilachna beetle	Chewing guild	Whitefly	Sucking guild	Epilachna beetle | Whitefly	-0.257	ns	negative	weak
5th crop	Biochemical controlled	Flea beetle	Chewing guild	Jassid	Sucking guild	Flea beetle | Jassid	0.068	ns	positive	weak
5th crop	Biochemical controlled	Lady bird beetle	Predatory guild	Flea beetle	Chewing guild	Flea beetle | Lady bird beetle	-0.027	ns	negative	weak
5th crop	Biochemical controlled	Flea beetle	Chewing guild	Mealybug	Sucking guild	Flea beetle | Mealybug	-0.309	ns	negative	weak-to-moderate
5th crop	Biochemical controlled	Spider	Predatory guild	Flea beetle	Chewing guild	Flea beetle | Spider	-0.124	ns	negative	weak
5th crop	Biochemical controlled	Flea beetle	Chewing guild	Thrips	Sucking guild	Flea beetle | Thrips	0.195	ns	positive	weak
5th crop	Biochemical controlled	Flea beetle	Chewing guild	Whitefly	Sucking guild	Flea beetle | Whitefly	0.244	ns	positive	weak
5th crop	Biochemical controlled	Lady bird beetle	Predatory guild	Jassid	Sucking guild	Jassid | Lady bird beetle	0.032	ns	positive	weak
5th crop	Biochemical controlled	Jassid	Sucking guild	Mealybug	Sucking guild	Jassid | Mealybug	-0.124	ns	negative	weak
5th crop	Biochemical controlled	Spider	Predatory guild	Jassid	Sucking guild	Jassid | Spider	0.101	ns	positive	weak
5th crop	Biochemical controlled	Thrips	Sucking guild	Jassid	Sucking guild	Jassid | Thrips	0.734	**	positive	strong
5th crop	Biochemical controlled	Lady bird beetle	Predatory guild	Mealybug	Sucking guild	Lady bird beetle | Mealybug	-0.056	ns	negative	weak
5th crop	Biochemical controlled	Spider	Predatory guild	Lady bird beetle	Predatory guild	Lady bird beetle | Spider	-0.096	ns	negative	weak
5th crop	Biochemical controlled	Lady bird beetle	Predatory guild	Thrips	Sucking guild	Lady bird beetle | Thrips	0.106	ns	positive	weak
5th crop	Biochemical controlled	Lady bird beetle	Predatory guild	Whitefly	Sucking guild	Lady bird beetle | Whitefly	0.435	ns	positive	weak-to-moderate
5th crop	Biochemical controlled	Spider	Predatory guild	Mealybug	Sucking guild	Mealybug | Spider	-0.663	**	negative	moderate
5th crop	Biochemical controlled	Thrips	Sucking guild	Mealybug	Sucking guild	Mealybug | Thrips	0.042	ns	positive	weak
5th crop	Biochemical controlled	Whitefly	Sucking guild	Mealybug	Sucking guild	Mealybug | Whitefly	0.017	ns	positive	weak
5th crop	Biochemical controlled	Spider	Predatory guild	Thrips	Sucking guild	Spider | Thrips	-0.035	ns	negative	weak
5th crop	Biochemical controlled	Spider	Predatory guild	Whitefly	Sucking guild	Spider | Whitefly	-0.026	ns	negative	weak
5th crop	Biochemical controlled	Thrips	Sucking guild	Whitefly	Sucking guild	Thrips | Whitefly	0.356	ns	positive	weak-to-moderate
6th crop	Biochemical controlled	Ant	Ant guild	Aphid	Sucking guild	Ant | Aphid	0.624	**	positive	moderate
6th crop	Biochemical controlled	Ant	Ant guild	BSFB	Chewing guild	Ant | BSFB	-0.049	ns	negative	weak
6th crop	Biochemical controlled	Ant	Ant guild	Epilachna beetle	Chewing guild	Ant | Epilachna beetle	-0.145	ns	negative	weak
6th crop	Biochemical controlled	Ant	Ant guild	Flea beetle	Chewing guild	Ant | Flea beetle	-0.173	ns	negative	weak
6th crop	Biochemical controlled	Ant	Ant guild	Jassid	Sucking guild	Ant | Jassid	-0.13	ns	negative	weak
6th crop	Biochemical controlled	Ant	Ant guild	Lady bird beetle	Predatory guild	Ant | Lady bird beetle	0.03	ns	positive	weak
6th crop	Biochemical controlled	Ant	Ant guild	Mealybug	Sucking guild	Ant | Mealybug	0.041	ns	positive	weak
6th crop	Biochemical controlled	Ant	Ant guild	Spider	Predatory guild	Ant | Spider	-0.412	ns	negative	weak-to-moderate
6th crop	Biochemical controlled	Ant	Ant guild	Whitefly	Sucking guild	Ant | Whitefly	-0.144	ns	negative	weak
6th crop	Biochemical controlled	Epilachna beetle	Chewing guild	Aphid	Sucking guild	Aphid | Epilachna beetle	0.168	ns	positive	weak
6th crop	Biochemical controlled	Flea beetle	Chewing guild	Aphid	Sucking guild	Aphid | Flea beetle	0.039	ns	positive	weak
6th crop	Biochemical controlled	Aphid	Sucking guild	Jassid	Sucking guild	Aphid | Jassid	-0.236	ns	negative	weak
6th crop	Biochemical controlled	Lady bird beetle	Predatory guild	Aphid	Sucking guild	Aphid | Lady bird beetle	0.163	ns	positive	weak
6th crop	Biochemical controlled	Aphid	Sucking guild	Mealybug	Sucking guild	Aphid | Mealybug	0.053	ns	positive	weak
6th crop	Biochemical controlled	Spider	Predatory guild	Aphid	Sucking guild	Aphid | Spider	0.071	ns	positive	weak
6th crop	Biochemical controlled	Aphid	Sucking guild	Whitefly	Sucking guild	Aphid | Whitefly	0.081	ns	positive	weak
6th crop	Biochemical controlled	Lady bird beetle	Predatory guild	BSFB	Chewing guild	BSFB | Lady bird beetle	-0.141	ns	negative	weak
6th crop	Biochemical controlled	Spider	Predatory guild	BSFB	Chewing guild	BSFB | Spider	0.43	ns	positive	weak-to-moderate
6th crop	Biochemical controlled	Flea beetle	Chewing guild	Epilachna beetle	Chewing guild	Epilachna beetle | Flea beetle	0.015	ns	positive	weak
6th crop	Biochemical controlled	Epilachna beetle	Chewing guild	Jassid	Sucking guild	Epilachna beetle | Jassid	-0.185	ns	negative	weak
6th crop	Biochemical controlled	Lady bird beetle	Predatory guild	Epilachna beetle	Chewing guild	Epilachna beetle | Lady bird beetle	0.2	ns	positive	weak
6th crop	Biochemical controlled	Epilachna beetle	Chewing guild	Mealybug	Sucking guild	Epilachna beetle | Mealybug	-0.355	ns	negative	weak-to-moderate
6th crop	Biochemical controlled	Spider	Predatory guild	Epilachna beetle	Chewing guild	Epilachna beetle | Spider	0.159	ns	positive	weak
6th crop	Biochemical controlled	Epilachna beetle	Chewing guild	Whitefly	Sucking guild	Epilachna beetle | Whitefly	0.215	ns	positive	weak
6th crop	Biochemical controlled	Flea beetle	Chewing guild	Jassid	Sucking guild	Flea beetle | Jassid	0.255	ns	positive	weak
6th crop	Biochemical controlled	Lady bird beetle	Predatory guild	Flea beetle	Chewing guild	Flea beetle | Lady bird beetle	-0.378	ns	negative	weak-to-moderate
6th crop	Biochemical controlled	Flea beetle	Chewing guild	Mealybug	Sucking guild	Flea beetle | Mealybug	0.234	ns	positive	weak
6th crop	Biochemical controlled	Spider	Predatory guild	Flea beetle	Chewing guild	Flea beetle | Spider	0.148	ns	positive	weak
6th crop	Biochemical controlled	Flea beetle	Chewing guild	Whitefly	Sucking guild	Flea beetle | Whitefly	0.353	ns	positive	weak-to-moderate
6th crop	Biochemical controlled	Lady bird beetle	Predatory guild	Jassid	Sucking guild	Jassid | Lady bird beetle	-0.012	ns	negative	weak
6th crop	Biochemical controlled	Jassid	Sucking guild	Mealybug	Sucking guild	Jassid | Mealybug	0.062	ns	positive	weak
6th crop	Biochemical controlled	Spider	Predatory guild	Jassid	Sucking guild	Jassid | Spider	-0.169	ns	negative	weak
6th crop	Biochemical controlled	Jassid	Sucking guild	Whitefly	Sucking guild	Jassid | Whitefly	0.438	ns	positive	weak-to-moderate
6th crop	Biochemical controlled	Lady bird beetle	Predatory guild	Mealybug	Sucking guild	Lady bird beetle | Mealybug	-0.266	ns	negative	weak
6th crop	Biochemical controlled	Spider	Predatory guild	Lady bird beetle	Predatory guild	Lady bird beetle | Spider	0.227	ns	positive	weak
6th crop	Biochemical controlled	Lady bird beetle	Predatory guild	Whitefly	Sucking guild	Lady bird beetle | Whitefly	0.199	ns	positive	weak
6th crop	Biochemical controlled	Spider	Predatory guild	Mealybug	Sucking guild	Mealybug | Spider	-0.376	ns	negative	weak-to-moderate
6th crop	Biochemical controlled	Whitefly	Sucking guild	Mealybug	Sucking guild	Mealybug | Whitefly	0.049	ns	positive	weak
6th crop	Biochemical controlled	Spider	Predatory guild	Whitefly	Sucking guild	Spider | Whitefly	-0.144	ns	negative	weak
7th crop	Biochemical controlled	Ant	Ant guild	Aphid	Sucking guild	Ant | Aphid	0.686	**	positive	moderate
7th crop	Biochemical controlled	Ant	Ant guild	BSFB	Chewing guild	Ant | BSFB	0.256	ns	positive	weak
7th crop	Biochemical controlled	Ant	Ant guild	Epilachna beetle	Chewing guild	Ant | Epilachna beetle	-0.41	ns	negative	weak-to-moderate
7th crop	Biochemical controlled	Ant	Ant guild	Flea beetle	Chewing guild	Ant | Flea beetle	0.028	ns	positive	weak
7th crop	Biochemical controlled	Ant	Ant guild	Jassid	Sucking guild	Ant | Jassid	-0.165	ns	negative	weak
7th crop	Biochemical controlled	Ant	Ant guild	Lady bird beetle	Predatory guild	Ant | Lady bird beetle	0.228	ns	positive	weak
7th crop	Biochemical controlled	Ant	Ant guild	Mealybug	Sucking guild	Ant | Mealybug	-0.07	ns	negative	weak
7th crop	Biochemical controlled	Ant	Ant guild	Spider	Predatory guild	Ant | Spider	-0.2	ns	negative	weak
7th crop	Biochemical controlled	Ant	Ant guild	Thrips	Sucking guild	Ant | Thrips	0.16	ns	positive	weak
7th crop	Biochemical controlled	Ant	Ant guild	Whitefly	Sucking guild	Ant | Whitefly	-0.226	ns	negative	weak
7th crop	Biochemical controlled	Epilachna beetle	Chewing guild	Aphid	Sucking guild	Aphid | Epilachna beetle	-0.415	ns	negative	weak-to-moderate
7th crop	Biochemical controlled	Flea beetle	Chewing guild	Aphid	Sucking guild	Aphid | Flea beetle	-0.38	ns	negative	weak-to-moderate
7th crop	Biochemical controlled	Aphid	Sucking guild	Jassid	Sucking guild	Aphid | Jassid	-0.151	ns	negative	weak
7th crop	Biochemical controlled	Lady bird beetle	Predatory guild	Aphid	Sucking guild	Aphid | Lady bird beetle	0.277	ns	positive	weak
7th crop	Biochemical controlled	Aphid	Sucking guild	Mealybug	Sucking guild	Aphid | Mealybug	-0.164	ns	negative	weak
7th crop	Biochemical controlled	Spider	Predatory guild	Aphid	Sucking guild	Aphid | Spider	-0.461	ns	negative	weak-to-moderate
7th crop	Biochemical controlled	Thrips	Sucking guild	Aphid	Sucking guild	Aphid | Thrips	0.368	ns	positive	weak-to-moderate
7th crop	Biochemical controlled	Aphid	Sucking guild	Whitefly	Sucking guild	Aphid | Whitefly	-0.228	ns	negative	weak
7th crop	Biochemical controlled	Lady bird beetle	Predatory guild	BSFB	Chewing guild	BSFB | Lady bird beetle	0.225	ns	positive	weak
7th crop	Biochemical controlled	Spider	Predatory guild	BSFB	Chewing guild	BSFB | Spider	-0.172	ns	negative	weak
7th crop	Biochemical controlled	Flea beetle	Chewing guild	Epilachna beetle	Chewing guild	Epilachna beetle | Flea beetle	0.002	ns	positive	weak
7th crop	Biochemical controlled	Epilachna beetle	Chewing guild	Jassid	Sucking guild	Epilachna beetle | Jassid	-0.058	ns	negative	weak
7th crop	Biochemical controlled	Lady bird beetle	Predatory guild	Epilachna beetle	Chewing guild	Epilachna beetle | Lady bird beetle	-0.082	ns	negative	weak
7th crop	Biochemical controlled	Epilachna beetle	Chewing guild	Mealybug	Sucking guild	Epilachna beetle | Mealybug	0.373	ns	positive	weak-to-moderate
7th crop	Biochemical controlled	Spider	Predatory guild	Epilachna beetle	Chewing guild	Epilachna beetle | Spider	0.302	ns	positive	weak-to-moderate
7th crop	Biochemical controlled	Epilachna beetle	Chewing guild	Thrips	Sucking guild	Epilachna beetle | Thrips	-0.355	ns	negative	weak-to-moderate
7th crop	Biochemical controlled	Epilachna beetle	Chewing guild	Whitefly	Sucking guild	Epilachna beetle | Whitefly	0.099	ns	positive	weak
7th crop	Biochemical controlled	Flea beetle	Chewing guild	Jassid	Sucking guild	Flea beetle | Jassid	-0.198	ns	negative	weak
7th crop	Biochemical controlled	Lady bird beetle	Predatory guild	Flea beetle	Chewing guild	Flea beetle | Lady bird beetle	-0.064	ns	negative	weak
7th crop	Biochemical controlled	Flea beetle	Chewing guild	Mealybug	Sucking guild	Flea beetle | Mealybug	-0.311	ns	negative	weak-to-moderate
7th crop	Biochemical controlled	Spider	Predatory guild	Flea beetle	Chewing guild	Flea beetle | Spider	0.303	ns	positive	weak-to-moderate
7th crop	Biochemical controlled	Flea beetle	Chewing guild	Thrips	Sucking guild	Flea beetle | Thrips	0.119	ns	positive	weak
7th crop	Biochemical controlled	Flea beetle	Chewing guild	Whitefly	Sucking guild	Flea beetle | Whitefly	0.029	ns	positive	weak
7th crop	Biochemical controlled	Lady bird beetle	Predatory guild	Jassid	Sucking guild	Jassid | Lady bird beetle	0.224	ns	positive	weak
7th crop	Biochemical controlled	Jassid	Sucking guild	Mealybug	Sucking guild	Jassid | Mealybug	0.492	ns	positive	weak-to-moderate
7th crop	Biochemical controlled	Spider	Predatory guild	Jassid	Sucking guild	Jassid | Spider	0.134	ns	positive	weak
7th crop	Biochemical controlled	Thrips	Sucking guild	Jassid	Sucking guild	Jassid | Thrips	-0.018	ns	negative	weak
7th crop	Biochemical controlled	Jassid	Sucking guild	Whitefly	Sucking guild	Jassid | Whitefly	0.407	ns	positive	weak-to-moderate
7th crop	Biochemical controlled	Lady bird beetle	Predatory guild	Mealybug	Sucking guild	Lady bird beetle | Mealybug	0.201	ns	positive	weak
7th crop	Biochemical controlled	Spider	Predatory guild	Lady bird beetle	Predatory guild	Lady bird beetle | Spider	-0.316	ns	negative	weak-to-moderate
7th crop	Biochemical controlled	Lady bird beetle	Predatory guild	Thrips	Sucking guild	Lady bird beetle | Thrips	0.485	ns	positive	weak-to-moderate
7th crop	Biochemical controlled	Lady bird beetle	Predatory guild	Whitefly	Sucking guild	Lady bird beetle | Whitefly	-0.059	ns	negative	weak
7th crop	Biochemical controlled	Spider	Predatory guild	Mealybug	Sucking guild	Mealybug | Spider	-0.204	ns	negative	weak
7th crop	Biochemical controlled	Thrips	Sucking guild	Mealybug	Sucking guild	Mealybug | Thrips	-0.275	ns	negative	weak
7th crop	Biochemical controlled	Whitefly	Sucking guild	Mealybug	Sucking guild	Mealybug | Whitefly	-0.165	ns	negative	weak
7th crop	Biochemical controlled	Spider	Predatory guild	Thrips	Sucking guild	Spider | Thrips	-0.298	ns	negative	weak
7th crop	Biochemical controlled	Spider	Predatory guild	Whitefly	Sucking guild	Spider | Whitefly	0.379	ns	positive	weak-to-moderate
7th crop	Biochemical controlled	Thrips	Sucking guild	Whitefly	Sucking guild	Thrips | Whitefly	0.055	ns	positive	weak
8th crop	Biochemical controlled	Ant	Ant guild	Aphid	Sucking guild	Ant | Aphid	0.489	ns	positive	weak-to-moderate
8th crop	Biochemical controlled	Ant	Ant guild	BSFB	Chewing guild	Ant | BSFB	-0.099	ns	negative	weak
8th crop	Biochemical controlled	Ant	Ant guild	Epilachna beetle	Chewing guild	Ant | Epilachna beetle	0.429	ns	positive	weak-to-moderate
8th crop	Biochemical controlled	Ant	Ant guild	Flea beetle	Chewing guild	Ant | Flea beetle	0.066	ns	positive	weak
8th crop	Biochemical controlled	Ant	Ant guild	Jassid	Sucking guild	Ant | Jassid	-0.471	ns	negative	weak-to-moderate
8th crop	Biochemical controlled	Ant	Ant guild	Lady bird beetle	Predatory guild	Ant | Lady bird beetle	0.227	ns	positive	weak
8th crop	Biochemical controlled	Ant	Ant guild	Mealybug	Sucking guild	Ant | Mealybug	-0.252	ns	negative	weak
8th crop	Biochemical controlled	Ant	Ant guild	Spider	Predatory guild	Ant | Spider	0.043	ns	positive	weak
8th crop	Biochemical controlled	Ant	Ant guild	Thrips	Sucking guild	Ant | Thrips	-0.169	ns	negative	weak
8th crop	Biochemical controlled	Ant	Ant guild	Whitefly	Sucking guild	Ant | Whitefly	0.232	ns	positive	weak
8th crop	Biochemical controlled	Epilachna beetle	Chewing guild	Aphid	Sucking guild	Aphid | Epilachna beetle	0.681	**	positive	moderate
8th crop	Biochemical controlled	Flea beetle	Chewing guild	Aphid	Sucking guild	Aphid | Flea beetle	0.639	**	positive	moderate
8th crop	Biochemical controlled	Aphid	Sucking guild	Jassid	Sucking guild	Aphid | Jassid	0.092	ns	positive	weak
8th crop	Biochemical controlled	Lady bird beetle	Predatory guild	Aphid	Sucking guild	Aphid | Lady bird beetle	-0.15	ns	negative	weak
8th crop	Biochemical controlled	Aphid	Sucking guild	Mealybug	Sucking guild	Aphid | Mealybug	-0.483	ns	negative	weak-to-moderate
8th crop	Biochemical controlled	Spider	Predatory guild	Aphid	Sucking guild	Aphid | Spider	0.061	ns	positive	weak
8th crop	Biochemical controlled	Thrips	Sucking guild	Aphid	Sucking guild	Aphid | Thrips	-0.073	ns	negative	weak
8th crop	Biochemical controlled	Aphid	Sucking guild	Whitefly	Sucking guild	Aphid | Whitefly	0.531	*	positive	moderate
8th crop	Biochemical controlled	Lady bird beetle	Predatory guild	BSFB	Chewing guild	BSFB | Lady bird beetle	-0.137	ns	negative	weak
8th crop	Biochemical controlled	Spider	Predatory guild	BSFB	Chewing guild	BSFB | Spider	0.48	ns	positive	weak-to-moderate
8th crop	Biochemical controlled	Flea beetle	Chewing guild	Epilachna beetle	Chewing guild	Epilachna beetle | Flea beetle	0.557	*	positive	moderate
8th crop	Biochemical controlled	Epilachna beetle	Chewing guild	Jassid	Sucking guild	Epilachna beetle | Jassid	-0.221	ns	negative	weak
8th crop	Biochemical controlled	Lady bird beetle	Predatory guild	Epilachna beetle	Chewing guild	Epilachna beetle | Lady bird beetle	0.337	ns	positive	weak-to-moderate
8th crop	Biochemical controlled	Epilachna beetle	Chewing guild	Mealybug	Sucking guild	Epilachna beetle | Mealybug	-0.841	**	negative	strong
8th crop	Biochemical controlled	Spider	Predatory guild	Epilachna beetle	Chewing guild	Epilachna beetle | Spider	-0.012	ns	negative	weak
8th crop	Biochemical controlled	Epilachna beetle	Chewing guild	Thrips	Sucking guild	Epilachna beetle | Thrips	-0.461	ns	negative	weak-to-moderate
8th crop	Biochemical controlled	Epilachna beetle	Chewing guild	Whitefly	Sucking guild	Epilachna beetle | Whitefly	0.119	ns	positive	weak
8th crop	Biochemical controlled	Flea beetle	Chewing guild	Jassid	Sucking guild	Flea beetle | Jassid	0.325	ns	positive	weak-to-moderate
8th crop	Biochemical controlled	Lady bird beetle	Predatory guild	Flea beetle	Chewing guild	Flea beetle | Lady bird beetle	-0.278	ns	negative	weak
8th crop	Biochemical controlled	Flea beetle	Chewing guild	Mealybug	Sucking guild	Flea beetle | Mealybug	-0.37	ns	negative	weak-to-moderate
8th crop	Biochemical controlled	Spider	Predatory guild	Flea beetle	Chewing guild	Flea beetle | Spider	-0.143	ns	negative	weak
8th crop	Biochemical controlled	Flea beetle	Chewing guild	Thrips	Sucking guild	Flea beetle | Thrips	-0.136	ns	negative	weak
8th crop	Biochemical controlled	Flea beetle	Chewing guild	Whitefly	Sucking guild	Flea beetle | Whitefly	0.011	ns	positive	weak
8th crop	Biochemical controlled	Lady bird beetle	Predatory guild	Jassid	Sucking guild	Jassid | Lady bird beetle	-0.433	ns	negative	weak-to-moderate
8th crop	Biochemical controlled	Jassid	Sucking guild	Mealybug	Sucking guild	Jassid | Mealybug	0.276	ns	positive	weak
8th crop	Biochemical controlled	Spider	Predatory guild	Jassid	Sucking guild	Jassid | Spider	0.032	ns	positive	weak
8th crop	Biochemical controlled	Thrips	Sucking guild	Jassid	Sucking guild	Jassid | Thrips	0.61	*	positive	moderate
8th crop	Biochemical controlled	Jassid	Sucking guild	Whitefly	Sucking guild	Jassid | Whitefly	0.189	ns	positive	weak
8th crop	Biochemical controlled	Lady bird beetle	Predatory guild	Mealybug	Sucking guild	Lady bird beetle | Mealybug	-0.46	ns	negative	weak-to-moderate
8th crop	Biochemical controlled	Spider	Predatory guild	Lady bird beetle	Predatory guild	Lady bird beetle | Spider	0.368	ns	positive	weak-to-moderate
8th crop	Biochemical controlled	Lady bird beetle	Predatory guild	Thrips	Sucking guild	Lady bird beetle | Thrips	-0.495	ns	negative	weak-to-moderate
8th crop	Biochemical controlled	Lady bird beetle	Predatory guild	Whitefly	Sucking guild	Lady bird beetle | Whitefly	-0.261	ns	negative	weak
8th crop	Biochemical controlled	Spider	Predatory guild	Mealybug	Sucking guild	Mealybug | Spider	0.001	ns	positive	weak
8th crop	Biochemical controlled	Thrips	Sucking guild	Mealybug	Sucking guild	Mealybug | Thrips	0.476	ns	positive	weak-to-moderate
8th crop	Biochemical controlled	Whitefly	Sucking guild	Mealybug	Sucking guild	Mealybug | Whitefly	-0.032	ns	negative	weak
8th crop	Biochemical controlled	Spider	Predatory guild	Thrips	Sucking guild	Spider | Thrips	0.16	ns	positive	weak
8th crop	Biochemical controlled	Spider	Predatory guild	Whitefly	Sucking guild	Spider | Whitefly	0.293	ns	positive	weak
8th crop	Biochemical controlled	Thrips	Sucking guild	Whitefly	Sucking guild	Thrips | Whitefly	0.393	ns	positive	weak-to-moderate
9th crop	Biochemical controlled	Ant	Ant guild	Aphid	Sucking guild	Ant | Aphid	0.638	**	positive	moderate
9th crop	Biochemical controlled	Ant	Ant guild	BSFB	Chewing guild	Ant | BSFB	-0.429	ns	negative	weak-to-moderate
9th crop	Biochemical controlled	Ant	Ant guild	Epilachna beetle	Chewing guild	Ant | Epilachna beetle	0.679	**	positive	moderate
9th crop	Biochemical controlled	Ant	Ant guild	Flea beetle	Chewing guild	Ant | Flea beetle	-0.103	ns	negative	weak
9th crop	Biochemical controlled	Ant	Ant guild	Jassid	Sucking guild	Ant | Jassid	-0.055	ns	negative	weak
9th crop	Biochemical controlled	Ant	Ant guild	Lady bird beetle	Predatory guild	Ant | Lady bird beetle	0.494	ns	positive	weak-to-moderate
9th crop	Biochemical controlled	Ant	Ant guild	Leaf roller	Chewing guild	Ant | Leaf roller	0.432	ns	positive	weak-to-moderate
9th crop	Biochemical controlled	Ant	Ant guild	Spider	Predatory guild	Ant | Spider	0.443	ns	positive	weak-to-moderate
9th crop	Biochemical controlled	Ant	Ant guild	Thrips	Sucking guild	Ant | Thrips	-0.236	ns	negative	weak
9th crop	Biochemical controlled	Ant	Ant guild	Whitefly	Sucking guild	Ant | Whitefly	0.716	**	positive	strong
9th crop	Biochemical controlled	Epilachna beetle	Chewing guild	Aphid	Sucking guild	Aphid | Epilachna beetle	0.373	ns	positive	weak-to-moderate
9th crop	Biochemical controlled	Flea beetle	Chewing guild	Aphid	Sucking guild	Aphid | Flea beetle	0.377	ns	positive	weak-to-moderate
9th crop	Biochemical controlled	Aphid	Sucking guild	Jassid	Sucking guild	Aphid | Jassid	-0.009	ns	negative	weak
9th crop	Biochemical controlled	Lady bird beetle	Predatory guild	Aphid	Sucking guild	Aphid | Lady bird beetle	0.507	*	positive	moderate
9th crop	Biochemical controlled	Leaf roller	Chewing guild	Aphid	Sucking guild	Aphid | Leaf roller	0.241	ns	positive	weak
9th crop	Biochemical controlled	Spider	Predatory guild	Aphid	Sucking guild	Aphid | Spider	0.216	ns	positive	weak
9th crop	Biochemical controlled	Thrips	Sucking guild	Aphid	Sucking guild	Aphid | Thrips	0.196	ns	positive	weak
9th crop	Biochemical controlled	Aphid	Sucking guild	Whitefly	Sucking guild	Aphid | Whitefly	0.183	ns	positive	weak
9th crop	Biochemical controlled	Lady bird beetle	Predatory guild	BSFB	Chewing guild	BSFB | Lady bird beetle	-0.378	ns	negative	weak-to-moderate
9th crop	Biochemical controlled	Leaf roller	Chewing guild	BSFB	Chewing guild	BSFB | Leaf roller	-0.323	ns	negative	weak-to-moderate
9th crop	Biochemical controlled	Spider	Predatory guild	BSFB	Chewing guild	BSFB | Spider	-0.383	ns	negative	weak-to-moderate
9th crop	Biochemical controlled	Flea beetle	Chewing guild	Epilachna beetle	Chewing guild	Epilachna beetle | Flea beetle	-0.168	ns	negative	weak
9th crop	Biochemical controlled	Epilachna beetle	Chewing guild	Jassid	Sucking guild	Epilachna beetle | Jassid	-0.15	ns	negative	weak
9th crop	Biochemical controlled	Lady bird beetle	Predatory guild	Epilachna beetle	Chewing guild	Epilachna beetle | Lady bird beetle	0.198	ns	positive	weak
9th crop	Biochemical controlled	Leaf roller	Chewing guild	Epilachna beetle	Chewing guild	Epilachna beetle | Leaf roller	-0.011	ns	negative	weak
9th crop	Biochemical controlled	Spider	Predatory guild	Epilachna beetle	Chewing guild	Epilachna beetle | Spider	0.333	ns	positive	weak-to-moderate
9th crop	Biochemical controlled	Epilachna beetle	Chewing guild	Thrips	Sucking guild	Epilachna beetle | Thrips	-0.109	ns	negative	weak
9th crop	Biochemical controlled	Epilachna beetle	Chewing guild	Whitefly	Sucking guild	Epilachna beetle | Whitefly	0.575	*	positive	moderate
9th crop	Biochemical controlled	Flea beetle	Chewing guild	Jassid	Sucking guild	Flea beetle | Jassid	0.249	ns	positive	weak
9th crop	Biochemical controlled	Lady bird beetle	Predatory guild	Flea beetle	Chewing guild	Flea beetle | Lady bird beetle	0.157	ns	positive	weak
9th crop	Biochemical controlled	Leaf roller	Chewing guild	Flea beetle	Chewing guild	Flea beetle | Leaf roller	0.213	ns	positive	weak
9th crop	Biochemical controlled	Spider	Predatory guild	Flea beetle	Chewing guild	Flea beetle | Spider	0.001	ns	positive	weak
9th crop	Biochemical controlled	Flea beetle	Chewing guild	Thrips	Sucking guild	Flea beetle | Thrips	0.442	ns	positive	weak-to-moderate
9th crop	Biochemical controlled	Flea beetle	Chewing guild	Whitefly	Sucking guild	Flea beetle | Whitefly	-0.35	ns	negative	weak-to-moderate
9th crop	Biochemical controlled	Lady bird beetle	Predatory guild	Jassid	Sucking guild	Jassid | Lady bird beetle	0.161	ns	positive	weak
9th crop	Biochemical controlled	Leaf roller	Chewing guild	Jassid	Sucking guild	Jassid | Leaf roller	0.276	ns	positive	weak
9th crop	Biochemical controlled	Spider	Predatory guild	Jassid	Sucking guild	Jassid | Spider	-0.544	*	negative	moderate
9th crop	Biochemical controlled	Thrips	Sucking guild	Jassid	Sucking guild	Jassid | Thrips	0.601	*	positive	moderate
9th crop	Biochemical controlled	Jassid	Sucking guild	Whitefly	Sucking guild	Jassid | Whitefly	-0.352	ns	negative	weak-to-moderate
9th crop	Biochemical controlled	Lady bird beetle	Predatory guild	Leaf roller	Chewing guild	Lady bird beetle | Leaf roller	0.552	*	positive	moderate
9th crop	Biochemical controlled	Spider	Predatory guild	Lady bird beetle	Predatory guild	Lady bird beetle | Spider	0.196	ns	positive	weak
9th crop	Biochemical controlled	Lady bird beetle	Predatory guild	Thrips	Sucking guild	Lady bird beetle | Thrips	0.215	ns	positive	weak
9th crop	Biochemical controlled	Lady bird beetle	Predatory guild	Whitefly	Sucking guild	Lady bird beetle | Whitefly	0.505	*	positive	moderate
9th crop	Biochemical controlled	Spider	Predatory guild	Leaf roller	Chewing guild	Leaf roller | Spider	0.175	ns	positive	weak
9th crop	Biochemical controlled	Leaf roller	Chewing guild	Thrips	Sucking guild	Leaf roller | Thrips	-0.149	ns	negative	weak
9th crop	Biochemical controlled	Leaf roller	Chewing guild	Whitefly	Sucking guild	Leaf roller | Whitefly	0.231	ns	positive	weak
9th crop	Biochemical controlled	Spider	Predatory guild	Thrips	Sucking guild	Spider | Thrips	-0.431	ns	negative	weak-to-moderate
9th crop	Biochemical controlled	Spider	Predatory guild	Whitefly	Sucking guild	Spider | Whitefly	0.635	**	positive	moderate
9th crop	Biochemical controlled	Thrips	Sucking guild	Whitefly	Sucking guild	Thrips | Whitefly	-0.424	ns	negative	weak-to-moderate
10th crop	Biochemical controlled	Ant	Ant guild	Aphid	Sucking guild	Ant | Aphid	0.794	**	positive	strong
10th crop	Biochemical controlled	Ant	Ant guild	BSFB	Chewing guild	Ant | BSFB	-0.569	*	negative	moderate
10th crop	Biochemical controlled	Ant	Ant guild	Epilachna beetle	Chewing guild	Ant | Epilachna beetle	-0.151	ns	negative	weak
10th crop	Biochemical controlled	Ant	Ant guild	Flea beetle	Chewing guild	Ant | Flea beetle	0.08	ns	positive	weak
10th crop	Biochemical controlled	Ant	Ant guild	Jassid	Sucking guild	Ant | Jassid	-0.099	ns	negative	weak
10th crop	Biochemical controlled	Ant	Ant guild	Lady bird beetle	Predatory guild	Ant | Lady bird beetle	-0.488	ns	negative	weak-to-moderate
10th crop	Biochemical controlled	Ant	Ant guild	Spider	Predatory guild	Ant | Spider	-0.234	ns	negative	weak
10th crop	Biochemical controlled	Ant	Ant guild	Thrips	Sucking guild	Ant | Thrips	-0.172	ns	negative	weak
10th crop	Biochemical controlled	Ant	Ant guild	Whitefly	Sucking guild	Ant | Whitefly	0.155	ns	positive	weak
10th crop	Biochemical controlled	Epilachna beetle	Chewing guild	Aphid	Sucking guild	Aphid | Epilachna beetle	-0.142	ns	negative	weak
10th crop	Biochemical controlled	Flea beetle	Chewing guild	Aphid	Sucking guild	Aphid | Flea beetle	0.014	ns	positive	weak
10th crop	Biochemical controlled	Aphid	Sucking guild	Jassid	Sucking guild	Aphid | Jassid	0.142	ns	positive	weak
10th crop	Biochemical controlled	Lady bird beetle	Predatory guild	Aphid	Sucking guild	Aphid | Lady bird beetle	-0.579	*	negative	moderate
10th crop	Biochemical controlled	Spider	Predatory guild	Aphid	Sucking guild	Aphid | Spider	-0.109	ns	negative	weak
10th crop	Biochemical controlled	Thrips	Sucking guild	Aphid	Sucking guild	Aphid | Thrips	-0.096	ns	negative	weak
10th crop	Biochemical controlled	Aphid	Sucking guild	Whitefly	Sucking guild	Aphid | Whitefly	0.392	ns	positive	weak-to-moderate
10th crop	Biochemical controlled	Lady bird beetle	Predatory guild	BSFB	Chewing guild	BSFB | Lady bird beetle	0.647	**	positive	moderate
10th crop	Biochemical controlled	Spider	Predatory guild	BSFB	Chewing guild	BSFB | Spider	0.387	ns	positive	weak-to-moderate
10th crop	Biochemical controlled	Flea beetle	Chewing guild	Epilachna beetle	Chewing guild	Epilachna beetle | Flea beetle	0.633	**	positive	moderate
10th crop	Biochemical controlled	Epilachna beetle	Chewing guild	Jassid	Sucking guild	Epilachna beetle | Jassid	-0.249	ns	negative	weak
10th crop	Biochemical controlled	Lady bird beetle	Predatory guild	Epilachna beetle	Chewing guild	Epilachna beetle | Lady bird beetle	0.057	ns	positive	weak
10th crop	Biochemical controlled	Spider	Predatory guild	Epilachna beetle	Chewing guild	Epilachna beetle | Spider	0.28	ns	positive	weak
10th crop	Biochemical controlled	Epilachna beetle	Chewing guild	Thrips	Sucking guild	Epilachna beetle | Thrips	-0.487	ns	negative	weak-to-moderate
10th crop	Biochemical controlled	Epilachna beetle	Chewing guild	Whitefly	Sucking guild	Epilachna beetle | Whitefly	-0.373	ns	negative	weak-to-moderate
10th crop	Biochemical controlled	Flea beetle	Chewing guild	Jassid	Sucking guild	Flea beetle | Jassid	-0.25	ns	negative	weak
10th crop	Biochemical controlled	Lady bird beetle	Predatory guild	Flea beetle	Chewing guild	Flea beetle | Lady bird beetle	-0.07	ns	negative	weak
10th crop	Biochemical controlled	Spider	Predatory guild	Flea beetle	Chewing guild	Flea beetle | Spider	0.212	ns	positive	weak
10th crop	Biochemical controlled	Flea beetle	Chewing guild	Thrips	Sucking guild	Flea beetle | Thrips	-0.354	ns	negative	weak-to-moderate
10th crop	Biochemical controlled	Flea beetle	Chewing guild	Whitefly	Sucking guild	Flea beetle | Whitefly	-0.216	ns	negative	weak
10th crop	Biochemical controlled	Lady bird beetle	Predatory guild	Jassid	Sucking guild	Jassid | Lady bird beetle	0.087	ns	positive	weak
10th crop	Biochemical controlled	Spider	Predatory guild	Jassid	Sucking guild	Jassid | Spider	0.099	ns	positive	weak
10th crop	Biochemical controlled	Thrips	Sucking guild	Jassid	Sucking guild	Jassid | Thrips	0.62	*	positive	moderate
10th crop	Biochemical controlled	Jassid	Sucking guild	Whitefly	Sucking guild	Jassid | Whitefly	0.685	**	positive	moderate
10th crop	Biochemical controlled	Spider	Predatory guild	Lady bird beetle	Predatory guild	Lady bird beetle | Spider	0.161	ns	positive	weak
10th crop	Biochemical controlled	Lady bird beetle	Predatory guild	Thrips	Sucking guild	Lady bird beetle | Thrips	0.315	ns	positive	weak-to-moderate
10th crop	Biochemical controlled	Lady bird beetle	Predatory guild	Whitefly	Sucking guild	Lady bird beetle | Whitefly	-0.064	ns	negative	weak
10th crop	Biochemical controlled	Spider	Predatory guild	Thrips	Sucking guild	Spider | Thrips	0.212	ns	positive	weak
10th crop	Biochemical controlled	Spider	Predatory guild	Whitefly	Sucking guild	Spider | Whitefly	0.193	ns	positive	weak
10th crop	Biochemical controlled	Thrips	Sucking guild	Whitefly	Sucking guild	Thrips | Whitefly	0.799	**	positive	strong
11th crop	Biochemical controlled	Ant	Ant guild	Aphid	Sucking guild	Ant | Aphid	-0.039	ns	negative	weak
11th crop	Biochemical controlled	Ant	Ant guild	BSFB	Chewing guild	Ant | BSFB	0.324	ns	positive	weak-to-moderate
11th crop	Biochemical controlled	Ant	Ant guild	Epilachna beetle	Chewing guild	Ant | Epilachna beetle	0.449	ns	positive	weak-to-moderate
11th crop	Biochemical controlled	Ant	Ant guild	Flea beetle	Chewing guild	Ant | Flea beetle	0.353	ns	positive	weak-to-moderate
11th crop	Biochemical controlled	Ant	Ant guild	Jassid	Sucking guild	Ant | Jassid	0.366	ns	positive	weak-to-moderate
11th crop	Biochemical controlled	Ant	Ant guild	Lady bird beetle	Predatory guild	Ant | Lady bird beetle	-0.304	ns	negative	weak-to-moderate
11th crop	Biochemical controlled	Ant	Ant guild	Mealybug	Sucking guild	Ant | Mealybug	0.154	ns	positive	weak
11th crop	Biochemical controlled	Ant	Ant guild	Spider	Predatory guild	Ant | Spider	-0.185	ns	negative	weak
11th crop	Biochemical controlled	Ant	Ant guild	Thrips	Sucking guild	Ant | Thrips	0.444	ns	positive	weak-to-moderate
11th crop	Biochemical controlled	Ant	Ant guild	Whitefly	Sucking guild	Ant | Whitefly	0.043	ns	positive	weak
11th crop	Biochemical controlled	Epilachna beetle	Chewing guild	Aphid	Sucking guild	Aphid | Epilachna beetle	0.062	ns	positive	weak
11th crop	Biochemical controlled	Flea beetle	Chewing guild	Aphid	Sucking guild	Aphid | Flea beetle	-0.38	ns	negative	weak-to-moderate
11th crop	Biochemical controlled	Aphid	Sucking guild	Jassid	Sucking guild	Aphid | Jassid	-0.514	*	negative	moderate
11th crop	Biochemical controlled	Lady bird eetle		Aphid	Sucking guild	Aphid | Lady bird eetle	0.068	ns	positive	weak
11th crop	Biochemical controlled	Aphid	Sucking guild	Mealybug	Sucking guild	Aphid | Mealybug	0.459	ns	positive	weak-to-moderate
11th crop	Biochemical controlled	Spider	Predatory guild	Aphid	Sucking guild	Aphid | Spider	0.015	ns	positive	weak
11th crop	Biochemical controlled	Thrips	Sucking guild	Aphid	Sucking guild	Aphid | Thrips	-0.153	ns	negative	weak
11th crop	Biochemical controlled	Aphid	Sucking guild	Whitefly	Sucking guild	Aphid | Whitefly	-0.258	ns	negative	weak
11th crop	Biochemical controlled	Lady bird eetle		BSFB	Chewing guild	BSFB | Lady bird eetle	-0.126	ns	negative	weak
11th crop	Biochemical controlled	Spider	Predatory guild	BSFB	Chewing guild	BSFB | Spider	-0.172	ns	negative	weak
11th crop	Biochemical controlled	Flea beetle	Chewing guild	Epilachna beetle	Chewing guild	Epilachna beetle | Flea beetle	-0.206	ns	negative	weak
11th crop	Biochemical controlled	Epilachna beetle	Chewing guild	Jassid	Sucking guild	Epilachna beetle | Jassid	-0.301	ns	negative	weak-to-moderate
11th crop	Biochemical controlled	Lady bird eetle		Epilachna beetle	Chewing guild	Epilachna beetle | Lady bird eetle	-0.232	ns	negative	weak
11th crop	Biochemical controlled	Epilachna beetle	Chewing guild	Mealybug	Sucking guild	Epilachna beetle | Mealybug	0.46	ns	positive	weak-to-moderate
11th crop	Biochemical controlled	Spider	Predatory guild	Epilachna beetle	Chewing guild	Epilachna beetle | Spider	-0.335	ns	negative	weak-to-moderate
11th crop	Biochemical controlled	Epilachna beetle	Chewing guild	Thrips	Sucking guild	Epilachna beetle | Thrips	0.037	ns	positive	weak
11th crop	Biochemical controlled	Epilachna beetle	Chewing guild	Whitefly	Sucking guild	Epilachna beetle | Whitefly	-0.25	ns	negative	weak
11th crop	Biochemical controlled	Flea beetle	Chewing guild	Jassid	Sucking guild	Flea beetle | Jassid	0.545	*	positive	moderate
11th crop	Biochemical controlled	Lady bird eetle		Flea beetle	Chewing guild	Flea beetle | Lady bird eetle	0.24	ns	positive	weak
11th crop	Biochemical controlled	Flea beetle	Chewing guild	Mealybug	Sucking guild	Flea beetle | Mealybug	-0.323	ns	negative	weak-to-moderate
11th crop	Biochemical controlled	Spider	Predatory guild	Flea beetle	Chewing guild	Flea beetle | Spider	0.047	ns	positive	weak
11th crop	Biochemical controlled	Flea beetle	Chewing guild	Thrips	Sucking guild	Flea beetle | Thrips	0.675	**	positive	moderate
11th crop	Biochemical controlled	Flea beetle	Chewing guild	Whitefly	Sucking guild	Flea beetle | Whitefly	0.613	*	positive	moderate
11th crop	Biochemical controlled	Lady bird eetle		Jassid	Sucking guild	Jassid | Lady bird eetle	0.071	ns	positive	weak
11th crop	Biochemical controlled	Jassid	Sucking guild	Mealybug	Sucking guild	Jassid | Mealybug	-0.249	ns	negative	weak
11th crop	Biochemical controlled	Spider	Predatory guild	Jassid	Sucking guild	Jassid | Spider	-0.127	ns	negative	weak
11th crop	Biochemical controlled	Thrips	Sucking guild	Jassid	Sucking guild	Jassid | Thrips	0.431	ns	positive	weak-to-moderate
11th crop	Biochemical controlled	Jassid	Sucking guild	Whitefly	Sucking guild	Jassid | Whitefly	0.481	ns	positive	weak-to-moderate
11th crop	Biochemical controlled	Spider	Predatory guild	Lady bird beetle	Predatory guild	Lady bird beetle | Spider	-0.215	ns	negative	weak
11th crop	Biochemical controlled	Lady bird eetle		Mealybug	Sucking guild	Lady bird eetle | Mealybug	-0.031	ns	negative	weak
11th crop	Biochemical controlled	Lady bird eetle		Thrips	Sucking guild	Lady bird eetle | Thrips	0.449	ns	positive	weak-to-moderate
11th crop	Biochemical controlled	Lady bird eetle		Whitefly	Sucking guild	Lady bird eetle | Whitefly	0.367	ns	positive	weak-to-moderate
11th crop	Biochemical controlled	Spider	Predatory guild	Mealybug	Sucking guild	Mealybug | Spider	-0.527	*	negative	moderate
11th crop	Biochemical controlled	Thrips	Sucking guild	Mealybug	Sucking guild	Mealybug | Thrips	-0.043	ns	negative	weak
11th crop	Biochemical controlled	Whitefly	Sucking guild	Mealybug	Sucking guild	Mealybug | Whitefly	-0.14	ns	negative	weak
11th crop	Biochemical controlled	Spider	Predatory guild	Thrips	Sucking guild	Spider | Thrips	-0.412	ns	negative	weak-to-moderate
11th crop	Biochemical controlled	Spider	Predatory guild	Whitefly	Sucking guild	Spider | Whitefly	0.081	ns	positive	weak
11th crop	Biochemical controlled	Thrips	Sucking guild	Whitefly	Sucking guild	Thrips | Whitefly	0.303	ns	positive	weak-to-moderate
1st crop	Physico-morphic controlled	Ant	Ant guild	Aphid	Sucking guild	Ant | Aphid	0.061	ns	positive	weak
1st crop	Physico-morphic controlled	Ant	Ant guild	BSFB	Chewing guild	Ant | BSFB	0.395	ns	positive	weak-to-moderate
1st crop	Physico-morphic controlled	Ant	Ant guild	Epilachna beetle	Chewing guild	Ant | Epilachna beetle	0.421	ns	positive	weak-to-moderate
1st crop	Physico-morphic controlled	Ant	Ant guild	Flea beetle	Chewing guild	Ant | Flea beetle	-0.209	ns	negative	weak
1st crop	Physico-morphic controlled	Ant	Ant guild	Jassid	Sucking guild	Ant | Jassid	0.311	ns	positive	weak-to-moderate
1st crop	Physico-morphic controlled	Ant	Ant guild	Lady bird beetle	Predatory guild	Ant | Lady bird beetle	-0.265	ns	negative	weak
1st crop	Physico-morphic controlled	Ant	Ant guild	Leaf roller	Chewing guild	Ant | Leaf roller	0.728	*	positive	strong
1st crop	Physico-morphic controlled	Ant	Ant guild	Mealybug	Sucking guild	Ant | Mealybug	0.662	*	positive	moderate
1st crop	Physico-morphic controlled	Ant	Ant guild	Spider	Predatory guild	Ant | Spider	0.388	ns	positive	weak-to-moderate
1st crop	Physico-morphic controlled	Ant	Ant guild	Whitefly	Sucking guild	Ant | Whitefly	0.204	ns	positive	weak
1st crop	Physico-morphic controlled	Epilachnabeetle		Aphid	Sucking guild	Aphid | Epilachnabeetle	-0.133	ns	negative	weak
1st crop	Physico-morphic controlled	Fleabeetle		Aphid	Sucking guild	Aphid | Fleabeetle	0.439	ns	positive	weak-to-moderate
1st crop	Physico-morphic controlled	Aphid	Sucking guild	Jassid	Sucking guild	Aphid | Jassid	0.343	ns	positive	weak-to-moderate
1st crop	Physico-morphic controlled	Lady birdbeetle		Aphid	Sucking guild	Aphid | Lady birdbeetle	-0.318	ns	negative	weak-to-moderate
1st crop	Physico-morphic controlled	Leaf roller	Chewing guild	Aphid	Sucking guild	Aphid | Leaf roller	-0.081	ns	negative	weak
1st crop	Physico-morphic controlled	Aphid	Sucking guild	Mealybug	Sucking guild	Aphid | Mealybug	0.388	ns	positive	weak-to-moderate
1st crop	Physico-morphic controlled	Spider	Predatory guild	Aphid	Sucking guild	Aphid | Spider	-0.148	ns	negative	weak
1st crop	Physico-morphic controlled	Aphid	Sucking guild	Whitefly	Sucking guild	Aphid | Whitefly	-0.309	ns	negative	weak-to-moderate
1st crop	Physico-morphic controlled	Lady birdbeetle		BSFB	Chewing guild	BSFB | Lady birdbeetle	0.179	ns	positive	weak
1st crop	Physico-morphic controlled	Leaf roller	Chewing guild	BSFB	Chewing guild	BSFB | Leaf roller	0.122	ns	positive	weak
1st crop	Physico-morphic controlled	Spider	Predatory guild	BSFB	Chewing guild	BSFB | Spider	0.626	*	positive	moderate
1st crop	Physico-morphic controlled	Fleabeetle		Epilachna beetle	Chewing guild	Epilachna beetle | Fleabeetle	0.204	ns	positive	weak
1st crop	Physico-morphic controlled	Lady birdbeetle		Epilachna beetle	Chewing guild	Epilachna beetle | Lady birdbeetle	-0.229	ns	negative	weak
1st crop	Physico-morphic controlled	Leaf roller	Chewing guild	Epilachna beetle	Chewing guild	Epilachna beetle | Leaf roller	0.072	ns	positive	weak
1st crop	Physico-morphic controlled	Spider	Predatory guild	Epilachna beetle	Chewing guild	Epilachna beetle | Spider	0.5	ns	positive	moderate
1st crop	Physico-morphic controlled	Epilachnabeetle		Jassid	Sucking guild	Epilachnabeetle | Jassid	-0.109	ns	negative	weak
1st crop	Physico-morphic controlled	Epilachnabeetle		Mealybug	Sucking guild	Epilachnabeetle | Mealybug	-0.062	ns	negative	weak
1st crop	Physico-morphic controlled	Epilachnabeetle		Whitefly	Sucking guild	Epilachnabeetle | Whitefly	-0.139	ns	negative	weak
1st crop	Physico-morphic controlled	Lady birdbeetle		Flea beetle	Chewing guild	Flea beetle | Lady birdbeetle	-0.074	ns	negative	weak
1st crop	Physico-morphic controlled	Leaf roller	Chewing guild	Flea beetle	Chewing guild	Flea beetle | Leaf roller	-0.506	ns	negative	moderate
1st crop	Physico-morphic controlled	Spider	Predatory guild	Flea beetle	Chewing guild	Flea beetle | Spider	0.354	ns	positive	weak-to-moderate
1st crop	Physico-morphic controlled	Fleabeetle		Jassid	Sucking guild	Fleabeetle | Jassid	0.475	ns	positive	weak-to-moderate
1st crop	Physico-morphic controlled	Fleabeetle		Mealybug	Sucking guild	Fleabeetle | Mealybug	-0.177	ns	negative	weak
1st crop	Physico-morphic controlled	Fleabeetle		Whitefly	Sucking guild	Fleabeetle | Whitefly	-0.501	ns	negative	moderate
1st crop	Physico-morphic controlled	Lady birdbeetle		Jassid	Sucking guild	Jassid | Lady birdbeetle	-0.059	ns	negative	weak
1st crop	Physico-morphic controlled	Leaf roller	Chewing guild	Jassid	Sucking guild	Jassid | Leaf roller	-0.08	ns	negative	weak
1st crop	Physico-morphic controlled	Jassid	Sucking guild	Mealybug	Sucking guild	Jassid | Mealybug	0.278	ns	positive	weak
1st crop	Physico-morphic controlled	Spider	Predatory guild	Jassid	Sucking guild	Jassid | Spider	0.462	ns	positive	weak-to-moderate
1st crop	Physico-morphic controlled	Jassid	Sucking guild	Whitefly	Sucking guild	Jassid | Whitefly	0.118	ns	positive	weak
1st crop	Physico-morphic controlled	Spider	Predatory guild	Lady bird beetle	Predatory guild	Lady bird beetle | Spider	0.04	ns	positive	weak
1st crop	Physico-morphic controlled	Lady birdbeetle		Leaf roller	Chewing guild	Lady birdbeetle | Leaf roller	-0.148	ns	negative	weak
1st crop	Physico-morphic controlled	Lady birdbeetle		Mealybug	Sucking guild	Lady birdbeetle | Mealybug	-0.022	ns	negative	weak
1st crop	Physico-morphic controlled	Lady birdbeetle		Whitefly	Sucking guild	Lady birdbeetle | Whitefly	-0.057	ns	negative	weak
1st crop	Physico-morphic controlled	Leaf roller	Chewing guild	Mealybug	Sucking guild	Leaf roller | Mealybug	0.765	**	positive	strong
1st crop	Physico-morphic controlled	Spider	Predatory guild	Leaf roller	Chewing guild	Leaf roller | Spider	0.171	ns	positive	weak
1st crop	Physico-morphic controlled	Leaf roller	Chewing guild	Whitefly	Sucking guild	Leaf roller | Whitefly	0.043	ns	positive	weak
1st crop	Physico-morphic controlled	Spider	Predatory guild	Mealybug	Sucking guild	Mealybug | Spider	0.029	ns	positive	weak
1st crop	Physico-morphic controlled	Whitefly	Sucking guild	Mealybug	Sucking guild	Mealybug | Whitefly	0.031	ns	positive	weak
1st crop	Physico-morphic controlled	Spider	Predatory guild	Whitefly	Sucking guild	Spider | Whitefly	-0.192	ns	negative	weak
2nd crop	Physico-morphic controlled	Ant	Ant guild	Aphid	Sucking guild	Ant | Aphid	0.452	ns	positive	weak-to-moderate
2nd crop	Physico-morphic controlled	Ant	Ant guild	BSFB	Chewing guild	Ant | BSFB	0.42	ns	positive	weak-to-moderate
2nd crop	Physico-morphic controlled	Ant	Ant guild	Epilachna beetle	Chewing guild	Ant | Epilachna beetle	0.591	ns	positive	moderate
2nd crop	Physico-morphic controlled	Ant	Ant guild	Flea beetle	Chewing guild	Ant | Flea beetle	0.306	ns	positive	weak-to-moderate
2nd crop	Physico-morphic controlled	Ant	Ant guild	Jassid	Sucking guild	Ant | Jassid	-0.084	ns	negative	weak
2nd crop	Physico-morphic controlled	Ant	Ant guild	Lady bird beetle	Predatory guild	Ant | Lady bird beetle	0.052	ns	positive	weak
2nd crop	Physico-morphic controlled	Ant	Ant guild	Leaf roller	Chewing guild	Ant | Leaf roller	0.06	ns	positive	weak
2nd crop	Physico-morphic controlled	Ant	Ant guild	Mealybug	Sucking guild	Ant | Mealybug	-0.2	ns	negative	weak
2nd crop	Physico-morphic controlled	Ant	Ant guild	Spider	Predatory guild	Ant | Spider	0.298	ns	positive	weak
2nd crop	Physico-morphic controlled	Ant	Ant guild	Spodoptera sp.	Chewing guild	Ant | Spodoptera sp.	0.063	ns	positive	weak
2nd crop	Physico-morphic controlled	Ant	Ant guild	Whitefly	Sucking guild	Ant | Whitefly	0.739	**	positive	strong
2nd crop	Physico-morphic controlled	Epilachna beetle	Chewing guild	Aphid	Sucking guild	Aphid | Epilachna beetle	0.249	ns	positive	weak
2nd crop	Physico-morphic controlled	Flea beetle	Chewing guild	Aphid	Sucking guild	Aphid | Flea beetle	0.417	ns	positive	weak-to-moderate
2nd crop	Physico-morphic controlled	Fruit		Aphid	Sucking guild	Aphid | Fruit	0.377	ns	positive	weak-to-moderate
2nd crop	Physico-morphic controlled	Aphid	Sucking guild	Jassid	Sucking guild	Aphid | Jassid	0.017	ns	positive	weak
2nd crop	Physico-morphic controlled	Lady bird beetle	Predatory guild	Aphid	Sucking guild	Aphid | Lady bird beetle	0.459	ns	positive	weak-to-moderate
2nd crop	Physico-morphic controlled	Leaf roller	Chewing guild	Aphid	Sucking guild	Aphid | Leaf roller	-0.618	*	negative	moderate
2nd crop	Physico-morphic controlled	Aphid	Sucking guild	Mealybug	Sucking guild	Aphid | Mealybug	0.166	ns	positive	weak
2nd crop	Physico-morphic controlled	Spider	Predatory guild	Aphid	Sucking guild	Aphid | Spider	-0.02	ns	negative	weak
2nd crop	Physico-morphic controlled	Spodoptera sp.	Chewing guild	Aphid	Sucking guild	Aphid | Spodoptera sp.	0.174	ns	positive	weak
2nd crop	Physico-morphic controlled	Aphid	Sucking guild	Whitefly	Sucking guild	Aphid | Whitefly	0.255	ns	positive	weak
2nd crop	Physico-morphic controlled	Lady bird beetle	Predatory guild	BSFB	Chewing guild	BSFB | Lady bird beetle	-0.091	ns	negative	weak
2nd crop	Physico-morphic controlled	Leaf roller	Chewing guild	BSFB	Chewing guild	BSFB | Leaf roller	-0.043	ns	negative	weak
2nd crop	Physico-morphic controlled	Spider	Predatory guild	BSFB	Chewing guild	BSFB | Spider	0.244	ns	positive	weak
2nd crop	Physico-morphic controlled	Spodoptera sp.	Chewing guild	BSFB	Chewing guild	BSFB | Spodoptera sp.	-0.455	ns	negative	weak-to-moderate
2nd crop	Physico-morphic controlled	Flea beetle	Chewing guild	Epilachna beetle	Chewing guild	Epilachna beetle | Flea beetle	-0.353	ns	negative	weak-to-moderate
2nd crop	Physico-morphic controlled	Fruit		Epilachna beetle	Chewing guild	Epilachna beetle | Fruit	0.674	*	positive	moderate
2nd crop	Physico-morphic controlled	Epilachna beetle	Chewing guild	Jassid	Sucking guild	Epilachna beetle | Jassid	0.315	ns	positive	weak-to-moderate
2nd crop	Physico-morphic controlled	Lady bird beetle	Predatory guild	Epilachna beetle	Chewing guild	Epilachna beetle | Lady bird beetle	0.188	ns	positive	weak
2nd crop	Physico-morphic controlled	Leaf roller	Chewing guild	Epilachna beetle	Chewing guild	Epilachna beetle | Leaf roller	0.089	ns	positive	weak
2nd crop	Physico-morphic controlled	Epilachna beetle	Chewing guild	Mealybug	Sucking guild	Epilachna beetle | Mealybug	-0.116	ns	negative	weak
2nd crop	Physico-morphic controlled	Spider	Predatory guild	Epilachna beetle	Chewing guild	Epilachna beetle | Spider	0.054	ns	positive	weak
2nd crop	Physico-morphic controlled	Spodoptera sp.	Chewing guild	Epilachna beetle	Chewing guild	Epilachna beetle | Spodoptera sp.	-0.56	ns	negative	moderate
2nd crop	Physico-morphic controlled	Epilachna beetle	Chewing guild	Whitefly	Sucking guild	Epilachna beetle | Whitefly	0.359	ns	positive	weak-to-moderate
2nd crop	Physico-morphic controlled	Fruit		Flea beetle	Chewing guild	Flea beetle | Fruit	-0.003	ns	negative	weak
2nd crop	Physico-morphic controlled	Flea beetle	Chewing guild	Jassid	Sucking guild	Flea beetle | Jassid	-0.375	ns	negative	weak-to-moderate
2nd crop	Physico-morphic controlled	Lady bird beetle	Predatory guild	Flea beetle	Chewing guild	Flea beetle | Lady bird beetle	-0.24	ns	negative	weak
2nd crop	Physico-morphic controlled	Leaf roller	Chewing guild	Flea beetle	Chewing guild	Flea beetle | Leaf roller	-0.101	ns	negative	weak
2nd crop	Physico-morphic controlled	Flea beetle	Chewing guild	Mealybug	Sucking guild	Flea beetle | Mealybug	-0.398	ns	negative	weak-to-moderate
2nd crop	Physico-morphic controlled	Spider	Predatory guild	Flea beetle	Chewing guild	Flea beetle | Spider	-0.06	ns	negative	weak
2nd crop	Physico-morphic controlled	Spodoptera sp.	Chewing guild	Flea beetle	Chewing guild	Flea beetle | Spodoptera sp.	0.38	ns	positive	weak-to-moderate
2nd crop	Physico-morphic controlled	Flea beetle	Chewing guild	Whitefly	Sucking guild	Flea beetle | Whitefly	0.255	ns	positive	weak
2nd crop	Physico-morphic controlled	Fruit		Jassid	Sucking guild	Fruit | Jassid	0.055	ns	positive	weak
2nd crop	Physico-morphic controlled	Fruit		Mealybug	Sucking guild	Fruit | Mealybug	-0.483	ns	negative	weak-to-moderate
2nd crop	Physico-morphic controlled	Fruit		Whitefly	Sucking guild	Fruit | Whitefly	0.284	ns	positive	weak
2nd crop	Physico-morphic controlled	Lady bird beetle	Predatory guild	Jassid	Sucking guild	Jassid | Lady bird beetle	0.331	ns	positive	weak-to-moderate
2nd crop	Physico-morphic controlled	Leaf roller	Chewing guild	Jassid	Sucking guild	Jassid | Leaf roller	-0.204	ns	negative	weak
2nd crop	Physico-morphic controlled	Jassid	Sucking guild	Mealybug	Sucking guild	Jassid | Mealybug	0.294	ns	positive	weak
2nd crop	Physico-morphic controlled	Spider	Predatory guild	Jassid	Sucking guild	Jassid | Spider	-0.601	ns	negative	moderate
2nd crop	Physico-morphic controlled	Spodoptera sp.	Chewing guild	Jassid	Sucking guild	Jassid | Spodoptera sp.	-0.617	*	negative	moderate
2nd crop	Physico-morphic controlled	Jassid	Sucking guild	Whitefly	Sucking guild	Jassid | Whitefly	-0.612	*	negative	moderate
2nd crop	Physico-morphic controlled	Lady bird beetle	Predatory guild	Leaf roller	Chewing guild	Lady bird beetle | Leaf roller	-0.276	ns	negative	weak
2nd crop	Physico-morphic controlled	Lady bird beetle	Predatory guild	Mealybug	Sucking guild	Lady bird beetle | Mealybug	0.794	**	positive	strong
2nd crop	Physico-morphic controlled	Spider	Predatory guild	Lady bird beetle	Predatory guild	Lady bird beetle | Spider	-0.328	ns	negative	weak-to-moderate
2nd crop	Physico-morphic controlled	Lady bird beetle	Predatory guild	Spodoptera sp.	Chewing guild	Lady bird beetle | Spodoptera sp.	0.091	ns	positive	weak
2nd crop	Physico-morphic controlled	Lady bird beetle	Predatory guild	Whitefly	Sucking guild	Lady bird beetle | Whitefly	0	ns	zero	weak
2nd crop	Physico-morphic controlled	Leaf roller	Chewing guild	Mealybug	Sucking guild	Leaf roller | Mealybug	-0.435	ns	negative	weak-to-moderate
2nd crop	Physico-morphic controlled	Spider	Predatory guild	Leaf roller	Chewing guild	Leaf roller | Spider	-0.072	ns	negative	weak
2nd crop	Physico-morphic controlled	Leaf roller	Chewing guild	Spodoptera sp.	Chewing guild	Leaf roller | Spodoptera sp.	-0.128	ns	negative	weak
2nd crop	Physico-morphic controlled	Leaf roller	Chewing guild	Whitefly	Sucking guild	Leaf roller | Whitefly	0.246	ns	positive	weak
2nd crop	Physico-morphic controlled	Spider	Predatory guild	Mealybug	Sucking guild	Mealybug | Spider	-0.231	ns	negative	weak
2nd crop	Physico-morphic controlled	Spodoptera sp.	Chewing guild	Mealybug	Sucking guild	Mealybug | Spodoptera sp.	0.329	ns	positive	weak-to-moderate
2nd crop	Physico-morphic controlled	Whitefly	Sucking guild	Mealybug	Sucking guild	Mealybug | Whitefly	-0.233	ns	negative	weak
2nd crop	Physico-morphic controlled	Spider	Predatory guild	Spodoptera sp.	Chewing guild	Spider | Spodoptera sp.	0.21	ns	positive	weak
2nd crop	Physico-morphic controlled	Spider	Predatory guild	Whitefly	Sucking guild	Spider | Whitefly	0.624	*	positive	moderate
2nd crop	Physico-morphic controlled	Spodoptera sp.	Chewing guild	Whitefly	Sucking guild	Spodoptera sp. | Whitefly	0.282	ns	positive	weak
3rd crop	Physico-morphic controlled	Ant	Ant guild	Aphid	Sucking guild	Ant | Aphid	0.327	ns	positive	weak-to-moderate
3rd crop	Physico-morphic controlled	Ant	Ant guild	BSFB	Chewing guild	Ant | BSFB	0.219	ns	positive	weak
3rd crop	Physico-morphic controlled	Ant	Ant guild	Epilachna beetle	Chewing guild	Ant | Epilachna beetle	-0.092	ns	negative	weak
3rd crop	Physico-morphic controlled	Ant	Ant guild	Flea beetle	Chewing guild	Ant | Flea beetle	0.424	ns	positive	weak-to-moderate
3rd crop	Physico-morphic controlled	Ant	Ant guild	Jassid	Sucking guild	Ant | Jassid	-0.166	ns	negative	weak
3rd crop	Physico-morphic controlled	Ant	Ant guild	Lady bird beetle	Predatory guild	Ant | Lady bird beetle	0.099	ns	positive	weak
3rd crop	Physico-morphic controlled	Ant	Ant guild	Leaf roller	Chewing guild	Ant | Leaf roller	0.074	ns	positive	weak
3rd crop	Physico-morphic controlled	Ant	Ant guild	Spider	Predatory guild	Ant | Spider	0.105	ns	positive	weak
3rd crop	Physico-morphic controlled	Ant	Ant guild	Thrips	Sucking guild	Ant | Thrips	0.404	ns	positive	weak-to-moderate
3rd crop	Physico-morphic controlled	Ant	Ant guild	Whitefly	Sucking guild	Ant | Whitefly	0.02	ns	positive	weak
3rd crop	Physico-morphic controlled	Epilachna beetle	Chewing guild	Aphid	Sucking guild	Aphid | Epilachna beetle	-0.116	ns	negative	weak
3rd crop	Physico-morphic controlled	Flea beetle	Chewing guild	Aphid	Sucking guild	Aphid | Flea beetle	0.229	ns	positive	weak
3rd crop	Physico-morphic controlled	Aphid	Sucking guild	Jassid	Sucking guild	Aphid | Jassid	0.083	ns	positive	weak
3rd crop	Physico-morphic controlled	Lady bird beetle	Predatory guild	Aphid	Sucking guild	Aphid | Lady bird beetle	0.538	ns	positive	moderate
3rd crop	Physico-morphic controlled	Leaf roller	Chewing guild	Aphid	Sucking guild	Aphid | Leaf roller	0.168	ns	positive	weak
3rd crop	Physico-morphic controlled	Spider	Predatory guild	Aphid	Sucking guild	Aphid | Spider	0.141	ns	positive	weak
3rd crop	Physico-morphic controlled	Thrips	Sucking guild	Aphid	Sucking guild	Aphid | Thrips	0.457	ns	positive	weak-to-moderate
3rd crop	Physico-morphic controlled	Aphid	Sucking guild	Whitefly	Sucking guild	Aphid | Whitefly	0.217	ns	positive	weak
3rd crop	Physico-morphic controlled	Lady bird beetle	Predatory guild	BSFB	Chewing guild	BSFB | Lady bird beetle	-0.575	ns	negative	moderate
3rd crop	Physico-morphic controlled	Leaf roller	Chewing guild	BSFB	Chewing guild	BSFB | Leaf roller	-0.394	ns	negative	weak-to-moderate
3rd crop	Physico-morphic controlled	Spider	Predatory guild	BSFB	Chewing guild	BSFB | Spider	-0.539	ns	negative	moderate
3rd crop	Physico-morphic controlled	Flea beetle	Chewing guild	Epilachna beetle	Chewing guild	Epilachna beetle | Flea beetle	-0.502	ns	negative	moderate
3rd crop	Physico-morphic controlled	Epilachna beetle	Chewing guild	Jassid	Sucking guild	Epilachna beetle | Jassid	-0.242	ns	negative	weak
3rd crop	Physico-morphic controlled	Lady bird beetle	Predatory guild	Epilachna beetle	Chewing guild	Epilachna beetle | Lady bird beetle	-0.53	ns	negative	moderate
3rd crop	Physico-morphic controlled	Leaf roller	Chewing guild	Epilachna beetle	Chewing guild	Epilachna beetle | Leaf roller	-0.292	ns	negative	weak
3rd crop	Physico-morphic controlled	Spider	Predatory guild	Epilachna beetle	Chewing guild	Epilachna beetle | Spider	-0.067	ns	negative	weak
3rd crop	Physico-morphic controlled	Epilachna beetle	Chewing guild	Thrips	Sucking guild	Epilachna beetle | Thrips	0.144	ns	positive	weak
3rd crop	Physico-morphic controlled	Epilachna beetle	Chewing guild	Whitefly	Sucking guild	Epilachna beetle | Whitefly	-0.064	ns	negative	weak
3rd crop	Physico-morphic controlled	Flea beetle	Chewing guild	Jassid	Sucking guild	Flea beetle | Jassid	0.37	ns	positive	weak-to-moderate
3rd crop	Physico-morphic controlled	Lady bird beetle	Predatory guild	Flea beetle	Chewing guild	Flea beetle | Lady bird beetle	0.669	*	positive	moderate
3rd crop	Physico-morphic controlled	Leaf roller	Chewing guild	Flea beetle	Chewing guild	Flea beetle | Leaf roller	0.184	ns	positive	weak
3rd crop	Physico-morphic controlled	Spider	Predatory guild	Flea beetle	Chewing guild	Flea beetle | Spider	0.479	ns	positive	weak-to-moderate
3rd crop	Physico-morphic controlled	Flea beetle	Chewing guild	Thrips	Sucking guild	Flea beetle | Thrips	-0.009	ns	negative	weak
3rd crop	Physico-morphic controlled	Flea beetle	Chewing guild	Whitefly	Sucking guild	Flea beetle | Whitefly	0.168	ns	positive	weak
3rd crop	Physico-morphic controlled	Lady bird beetle	Predatory guild	Jassid	Sucking guild	Jassid | Lady bird beetle	0.303	ns	positive	weak-to-moderate
3rd crop	Physico-morphic controlled	Leaf roller	Chewing guild	Jassid	Sucking guild	Jassid | Leaf roller	0.224	ns	positive	weak
3rd crop	Physico-morphic controlled	Spider	Predatory guild	Jassid	Sucking guild	Jassid | Spider	0.092	ns	positive	weak
3rd crop	Physico-morphic controlled	Thrips	Sucking guild	Jassid	Sucking guild	Jassid | Thrips	-0.302	ns	negative	weak-to-moderate
3rd crop	Physico-morphic controlled	Jassid	Sucking guild	Whitefly	Sucking guild	Jassid | Whitefly	0.594	ns	positive	moderate
3rd crop	Physico-morphic controlled	Lady bird beetle	Predatory guild	Leaf roller	Chewing guild	Lady bird beetle | Leaf roller	0.449	ns	positive	weak-to-moderate
3rd crop	Physico-morphic controlled	Spider	Predatory guild	Lady bird beetle	Predatory guild	Lady bird beetle | Spider	0.721	*	positive	strong
3rd crop	Physico-morphic controlled	Lady bird beetle	Predatory guild	Thrips	Sucking guild	Lady bird beetle | Thrips	-0.228	ns	negative	weak
3rd crop	Physico-morphic controlled	Lady bird beetle	Predatory guild	Whitefly	Sucking guild	Lady bird beetle | Whitefly	0.54	ns	positive	moderate
3rd crop	Physico-morphic controlled	Spider	Predatory guild	Leaf roller	Chewing guild	Leaf roller | Spider	0.471	ns	positive	weak-to-moderate
3rd crop	Physico-morphic controlled	Leaf roller	Chewing guild	Thrips	Sucking guild	Leaf roller | Thrips	-0.276	ns	negative	weak
3rd crop	Physico-morphic controlled	Leaf roller	Chewing guild	Whitefly	Sucking guild	Leaf roller | Whitefly	0.399	ns	positive	weak-to-moderate
3rd crop	Physico-morphic controlled	Spider	Predatory guild	Thrips	Sucking guild	Spider | Thrips	-0.37	ns	negative	weak-to-moderate
3rd crop	Physico-morphic controlled	Spider	Predatory guild	Whitefly	Sucking guild	Spider | Whitefly	0.624	*	positive	moderate
3rd crop	Physico-morphic controlled	Thrips	Sucking guild	Whitefly	Sucking guild	Thrips | Whitefly	-0.468	ns	negative	weak-to-moderate
4th crop	Physico-morphic controlled	Ant	Ant guild	Aphid	Sucking guild	Ant | Aphid	-0.247	ns	negative	weak
4th crop	Physico-morphic controlled	Ant	Ant guild	BSFB	Chewing guild	Ant | BSFB	-0.083	ns	negative	weak
4th crop	Physico-morphic controlled	Ant	Ant guild	Epilachna beetle	Chewing guild	Ant | Epilachna beetle	0.185	ns	positive	weak
4th crop	Physico-morphic controlled	Ant	Ant guild	Flea beetle	Chewing guild	Ant | Flea beetle	-0.232	ns	negative	weak
4th crop	Physico-morphic controlled	Ant	Ant guild	Jassid	Sucking guild	Ant | Jassid	-0.258	ns	negative	weak
4th crop	Physico-morphic controlled	Ant	Ant guild	Lady bird beetle	Predatory guild	Ant | Lady bird beetle	-0.344	ns	negative	weak-to-moderate
4th crop	Physico-morphic controlled	Ant	Ant guild	Spider	Predatory guild	Ant | Spider	-0.568	ns	negative	moderate
4th crop	Physico-morphic controlled	Ant	Ant guild	Thrips	Sucking guild	Ant | Thrips	-0.386	ns	negative	weak-to-moderate
4th crop	Physico-morphic controlled	Ant	Ant guild	Whitefly	Sucking guild	Ant | Whitefly	-0.225	ns	negative	weak
4th crop	Physico-morphic controlled	Epilachna beetle	Chewing guild	Aphid	Sucking guild	Aphid | Epilachna beetle	0.174	ns	positive	weak
4th crop	Physico-morphic controlled	Flea beetle	Chewing guild	Aphid	Sucking guild	Aphid | Flea beetle	-0.113	ns	negative	weak
4th crop	Physico-morphic controlled	Aphid	Sucking guild	Jassid	Sucking guild	Aphid | Jassid	-0.074	ns	negative	weak
4th crop	Physico-morphic controlled	Lady bird beetle	Predatory guild	Aphid	Sucking guild	Aphid | Lady bird beetle	0.024	ns	positive	weak
4th crop	Physico-morphic controlled	Spider	Predatory guild	Aphid	Sucking guild	Aphid | Spider	0.057	ns	positive	weak
4th crop	Physico-morphic controlled	Thrips	Sucking guild	Aphid	Sucking guild	Aphid | Thrips	-0.137	ns	negative	weak
4th crop	Physico-morphic controlled	Aphid	Sucking guild	Whitefly	Sucking guild	Aphid | Whitefly	0.017	ns	positive	weak
4th crop	Physico-morphic controlled	Lady bird beetle	Predatory guild	BSFB	Chewing guild	BSFB | Lady bird beetle	0.169	ns	positive	weak
4th crop	Physico-morphic controlled	Spider	Predatory guild	BSFB	Chewing guild	BSFB | Spider	0.504	ns	positive	moderate
4th crop	Physico-morphic controlled	Flea beetle	Chewing guild	Epilachna beetle	Chewing guild	Epilachna beetle | Flea beetle	-0.045	ns	negative	weak
4th crop	Physico-morphic controlled	Epilachna beetle	Chewing guild	Jassid	Sucking guild	Epilachna beetle | Jassid	-0.535	ns	negative	moderate
4th crop	Physico-morphic controlled	Lady bird beetle	Predatory guild	Epilachna beetle	Chewing guild	Epilachna beetle | Lady bird beetle	-0.668	*	negative	moderate
4th crop	Physico-morphic controlled	Spider	Predatory guild	Epilachna beetle	Chewing guild	Epilachna beetle | Spider	-0.318	ns	negative	weak-to-moderate
4th crop	Physico-morphic controlled	Epilachna beetle	Chewing guild	Thrips	Sucking guild	Epilachna beetle | Thrips	-0.599	ns	negative	moderate
4th crop	Physico-morphic controlled	Epilachna beetle	Chewing guild	Whitefly	Sucking guild	Epilachna beetle | Whitefly	-0.463	ns	negative	weak-to-moderate
4th crop	Physico-morphic controlled	Flea beetle	Chewing guild	Jassid	Sucking guild	Flea beetle | Jassid	0.6	ns	positive	moderate
4th crop	Physico-morphic controlled	Lady bird beetle	Predatory guild	Flea beetle	Chewing guild	Flea beetle | Lady bird beetle	-0.067	ns	negative	weak
4th crop	Physico-morphic controlled	Spider	Predatory guild	Flea beetle	Chewing guild	Flea beetle | Spider	0.832	**	positive	strong
4th crop	Physico-morphic controlled	Flea beetle	Chewing guild	Thrips	Sucking guild	Flea beetle | Thrips	0.766	**	positive	strong
4th crop	Physico-morphic controlled	Flea beetle	Chewing guild	Whitefly	Sucking guild	Flea beetle | Whitefly	0.652	*	positive	moderate
4th crop	Physico-morphic controlled	Lady bird beetle	Predatory guild	Jassid	Sucking guild	Jassid | Lady bird beetle	0.529	ns	positive	moderate
4th crop	Physico-morphic controlled	Spider	Predatory guild	Jassid	Sucking guild	Jassid | Spider	0.602	*	positive	moderate
4th crop	Physico-morphic controlled	Thrips	Sucking guild	Jassid	Sucking guild	Jassid | Thrips	0.744	**	positive	strong
4th crop	Physico-morphic controlled	Jassid	Sucking guild	Whitefly	Sucking guild	Jassid | Whitefly	0.759	**	positive	strong
4th crop	Physico-morphic controlled	Spider	Predatory guild	Lady bird beetle	Predatory guild	Lady bird beetle | Spider	0.223	ns	positive	weak
4th crop	Physico-morphic controlled	Lady bird beetle	Predatory guild	Thrips	Sucking guild	Lady bird beetle | Thrips	0.5	ns	positive	moderate
4th crop	Physico-morphic controlled	Lady bird beetle	Predatory guild	Whitefly	Sucking guild	Lady bird beetle | Whitefly	0.431	ns	positive	weak-to-moderate
4th crop	Physico-morphic controlled	Spider	Predatory guild	Thrips	Sucking guild	Spider | Thrips	0.877	**	positive	strong
4th crop	Physico-morphic controlled	Spider	Predatory guild	Whitefly	Sucking guild	Spider | Whitefly	0.724	*	positive	strong
4th crop	Physico-morphic controlled	Thrips	Sucking guild	Whitefly	Sucking guild	Thrips | Whitefly	0.828	**	positive	strong
5th crop	Physico-morphic controlled	Ant	Ant guild	Aphid	Sucking guild	Ant | Aphid	0.265	ns	positive	weak
5th crop	Physico-morphic controlled	Ant	Ant guild	BSFB	Chewing guild	Ant | BSFB	0.191	ns	positive	weak
5th crop	Physico-morphic controlled	Ant	Ant guild	Epilachna beetle	Chewing guild	Ant | Epilachna beetle	0.246	ns	positive	weak
5th crop	Physico-morphic controlled	Ant	Ant guild	Flea beetle	Chewing guild	Ant | Flea beetle	0.569	ns	positive	moderate
5th crop	Physico-morphic controlled	Ant	Ant guild	Jassid	Sucking guild	Ant | Jassid	0.239	ns	positive	weak
5th crop	Physico-morphic controlled	Ant	Ant guild	Lady bird beetle	Predatory guild	Ant | Lady bird beetle	-0.32	ns	negative	weak-to-moderate
5th crop	Physico-morphic controlled	Ant	Ant guild	Mealybug	Sucking guild	Ant | Mealybug	-0.266	ns	negative	weak
5th crop	Physico-morphic controlled	Ant	Ant guild	Spider	Predatory guild	Ant | Spider	0.27	ns	positive	weak
5th crop	Physico-morphic controlled	Ant	Ant guild	Thrips	Sucking guild	Ant | Thrips	0.4	ns	positive	weak-to-moderate
5th crop	Physico-morphic controlled	Ant	Ant guild	Whitefly	Sucking guild	Ant | Whitefly	0.557	ns	positive	moderate
5th crop	Physico-morphic controlled	Epilachna beetle	Chewing guild	Aphid	Sucking guild	Aphid | Epilachna beetle	0.021	ns	positive	weak
5th crop	Physico-morphic controlled	Flea beetle	Chewing guild	Aphid	Sucking guild	Aphid | Flea beetle	-0.017	ns	negative	weak
5th crop	Physico-morphic controlled	Aphid	Sucking guild	Jassid	Sucking guild	Aphid | Jassid	-0.022	ns	negative	weak
5th crop	Physico-morphic controlled	Lady bird beetle	Predatory guild	Aphid	Sucking guild	Aphid | Lady bird beetle	0.341	ns	positive	weak-to-moderate
5th crop	Physico-morphic controlled	Aphid	Sucking guild	Mealybug	Sucking guild	Aphid | Mealybug	0.193	ns	positive	weak
5th crop	Physico-morphic controlled	Spider	Predatory guild	Aphid	Sucking guild	Aphid | Spider	-0.106	ns	negative	weak
5th crop	Physico-morphic controlled	Thrips	Sucking guild	Aphid	Sucking guild	Aphid | Thrips	0.455	ns	positive	weak-to-moderate
5th crop	Physico-morphic controlled	Aphid	Sucking guild	Whitefly	Sucking guild	Aphid | Whitefly	0.482	ns	positive	weak-to-moderate
5th crop	Physico-morphic controlled	Lady bird beetle	Predatory guild	BSFB	Chewing guild	BSFB | Lady bird beetle	0.679	*	positive	moderate
5th crop	Physico-morphic controlled	Spider	Predatory guild	BSFB	Chewing guild	BSFB | Spider	0.35	ns	positive	weak-to-moderate
5th crop	Physico-morphic controlled	Flea beetle	Chewing guild	Epilachna beetle	Chewing guild	Epilachna beetle | Flea beetle	0.054	ns	positive	weak
5th crop	Physico-morphic controlled	Epilachna beetle	Chewing guild	Jassid	Sucking guild	Epilachna beetle | Jassid	-0.418	ns	negative	weak-to-moderate
5th crop	Physico-morphic controlled	Lady bird beetle	Predatory guild	Epilachna beetle	Chewing guild	Epilachna beetle | Lady bird beetle	-0.257	ns	negative	weak
5th crop	Physico-morphic controlled	Epilachna beetle	Chewing guild	Mealybug	Sucking guild	Epilachna beetle | Mealybug	-0.178	ns	negative	weak
5th crop	Physico-morphic controlled	Spider	Predatory guild	Epilachna beetle	Chewing guild	Epilachna beetle | Spider	-0.02	ns	negative	weak
5th crop	Physico-morphic controlled	Epilachna beetle	Chewing guild	Thrips	Sucking guild	Epilachna beetle | Thrips	0.086	ns	positive	weak
5th crop	Physico-morphic controlled	Epilachna beetle	Chewing guild	Whitefly	Sucking guild	Epilachna beetle | Whitefly	0.222	ns	positive	weak
5th crop	Physico-morphic controlled	Flea beetle	Chewing guild	Jassid	Sucking guild	Flea beetle | Jassid	0.097	ns	positive	weak
5th crop	Physico-morphic controlled	Lady bird beetle	Predatory guild	Flea beetle	Chewing guild	Flea beetle | Lady bird beetle	-0.582	ns	negative	moderate
5th crop	Physico-morphic controlled	Flea beetle	Chewing guild	Mealybug	Sucking guild	Flea beetle | Mealybug	-0.263	ns	negative	weak
5th crop	Physico-morphic controlled	Spider	Predatory guild	Flea beetle	Chewing guild	Flea beetle | Spider	0.227	ns	positive	weak
5th crop	Physico-morphic controlled	Flea beetle	Chewing guild	Thrips	Sucking guild	Flea beetle | Thrips	0.246	ns	positive	weak
5th crop	Physico-morphic controlled	Flea beetle	Chewing guild	Whitefly	Sucking guild	Flea beetle | Whitefly	0.134	ns	positive	weak
5th crop	Physico-morphic controlled	Lady bird beetle	Predatory guild	Jassid	Sucking guild	Jassid | Lady bird beetle	0.039	ns	positive	weak
5th crop	Physico-morphic controlled	Jassid	Sucking guild	Mealybug	Sucking guild	Jassid | Mealybug	-0.353	ns	negative	weak-to-moderate
5th crop	Physico-morphic controlled	Spider	Predatory guild	Jassid	Sucking guild	Jassid | Spider	0.502	ns	positive	moderate
5th crop	Physico-morphic controlled	Thrips	Sucking guild	Jassid	Sucking guild	Jassid | Thrips	0.537	ns	positive	moderate
5th crop	Physico-morphic controlled	Jassid	Sucking guild	Whitefly	Sucking guild	Jassid | Whitefly	0.403	ns	positive	weak-to-moderate
5th crop	Physico-morphic controlled	Lady bird beetle	Predatory guild	Mealybug	Sucking guild	Lady bird beetle | Mealybug	0.244	ns	positive	weak
5th crop	Physico-morphic controlled	Spider	Predatory guild	Lady bird beetle	Predatory guild	Lady bird beetle | Spider	0.062	ns	positive	weak
5th crop	Physico-morphic controlled	Lady bird beetle	Predatory guild	Thrips	Sucking guild	Lady bird beetle | Thrips	-0.081	ns	negative	weak
5th crop	Physico-morphic controlled	Lady bird beetle	Predatory guild	Whitefly	Sucking guild	Lady bird beetle | Whitefly	0.047	ns	positive	weak
5th crop	Physico-morphic controlled	Spider	Predatory guild	Mealybug	Sucking guild	Mealybug | Spider	-0.897	**	negative	strong
5th crop	Physico-morphic controlled	Thrips	Sucking guild	Mealybug	Sucking guild	Mealybug | Thrips	-0.022	ns	negative	weak
5th crop	Physico-morphic controlled	Whitefly	Sucking guild	Mealybug	Sucking guild	Mealybug | Whitefly	-0.048	ns	negative	weak
5th crop	Physico-morphic controlled	Spider	Predatory guild	Thrips	Sucking guild	Spider | Thrips	0.063	ns	positive	weak
5th crop	Physico-morphic controlled	Spider	Predatory guild	Whitefly	Sucking guild	Spider | Whitefly	0.143	ns	positive	weak
5th crop	Physico-morphic controlled	Thrips	Sucking guild	Whitefly	Sucking guild	Thrips | Whitefly	0.817	**	positive	strong
6th crop	Physico-morphic controlled	Ant	Ant guild	Aphid	Sucking guild	Ant | Aphid	0.401	ns	positive	weak-to-moderate
6th crop	Physico-morphic controlled	Ant	Ant guild	BSFB	Chewing guild	Ant | BSFB	-0.024	ns	negative	weak
6th crop	Physico-morphic controlled	Ant	Ant guild	Epilachna beetle	Chewing guild	Ant | Epilachna beetle	-0.359	ns	negative	weak-to-moderate
6th crop	Physico-morphic controlled	Ant	Ant guild	Flea beetle	Chewing guild	Ant | Flea beetle	-0.119	ns	negative	weak
6th crop	Physico-morphic controlled	Ant	Ant guild	Jassid	Sucking guild	Ant | Jassid	-0.438	ns	negative	weak-to-moderate
6th crop	Physico-morphic controlled	Ant	Ant guild	Lady bird beetle	Predatory guild	Ant | Lady bird beetle	-0.053	ns	negative	weak
6th crop	Physico-morphic controlled	Ant	Ant guild	Mealybug	Sucking guild	Ant | Mealybug	0.009	ns	positive	weak
6th crop	Physico-morphic controlled	Ant	Ant guild	Spider	Predatory guild	Ant | Spider	-0.498	ns	negative	weak-to-moderate
6th crop	Physico-morphic controlled	Ant	Ant guild	Whitefly	Sucking guild	Ant | Whitefly	-0.562	ns	negative	moderate
6th crop	Physico-morphic controlled	Epilachna beetle	Chewing guild	Aphid	Sucking guild	Aphid | Epilachna beetle	-0.064	ns	negative	weak
6th crop	Physico-morphic controlled	Flea beetle	Chewing guild	Aphid	Sucking guild	Aphid | Flea beetle	0.104	ns	positive	weak
6th crop	Physico-morphic controlled	Aphid	Sucking guild	Jassid	Sucking guild	Aphid | Jassid	-0.162	ns	negative	weak
6th crop	Physico-morphic controlled	Lady bird beetle	Predatory guild	Aphid	Sucking guild	Aphid | Lady bird beetle	-0.021	ns	negative	weak
6th crop	Physico-morphic controlled	Aphid	Sucking guild	Mealybug	Sucking guild	Aphid | Mealybug	-0.386	ns	negative	weak-to-moderate
6th crop	Physico-morphic controlled	Spider	Predatory guild	Aphid	Sucking guild	Aphid | Spider	0.061	ns	positive	weak
6th crop	Physico-morphic controlled	Aphid	Sucking guild	Whitefly	Sucking guild	Aphid | Whitefly	-0.029	ns	negative	weak
6th crop	Physico-morphic controlled	Lady bird beetle	Predatory guild	BSFB	Chewing guild	BSFB | Lady bird beetle	-0.152	ns	negative	weak
6th crop	Physico-morphic controlled	Spider	Predatory guild	BSFB	Chewing guild	BSFB | Spider	0.39	ns	positive	weak-to-moderate
6th crop	Physico-morphic controlled	Flea beetle	Chewing guild	Epilachna beetle	Chewing guild	Epilachna beetle | Flea beetle	0.074	ns	positive	weak
6th crop	Physico-morphic controlled	Epilachna beetle	Chewing guild	Jassid	Sucking guild	Epilachna beetle | Jassid	0.015	ns	positive	weak
6th crop	Physico-morphic controlled	Lady bird beetle	Predatory guild	Epilachna beetle	Chewing guild	Epilachna beetle | Lady bird beetle	0.41	ns	positive	weak-to-moderate
6th crop	Physico-morphic controlled	Epilachna beetle	Chewing guild	Mealybug	Sucking guild	Epilachna beetle | Mealybug	-0.418	ns	negative	weak-to-moderate
6th crop	Physico-morphic controlled	Spider	Predatory guild	Epilachna beetle	Chewing guild	Epilachna beetle | Spider	0.458	ns	positive	weak-to-moderate
6th crop	Physico-morphic controlled	Epilachna beetle	Chewing guild	Whitefly	Sucking guild	Epilachna beetle | Whitefly	0.51	ns	positive	moderate
6th crop	Physico-morphic controlled	Flea beetle	Chewing guild	Jassid	Sucking guild	Flea beetle | Jassid	0.134	ns	positive	weak
6th crop	Physico-morphic controlled	Lady bird beetle	Predatory guild	Flea beetle	Chewing guild	Flea beetle | Lady bird beetle	-0.238	ns	negative	weak
6th crop	Physico-morphic controlled	Flea beetle	Chewing guild	Mealybug	Sucking guild	Flea beetle | Mealybug	-0.34	ns	negative	weak-to-moderate
6th crop	Physico-morphic controlled	Spider	Predatory guild	Flea beetle	Chewing guild	Flea beetle | Spider	0.621	*	positive	moderate
6th crop	Physico-morphic controlled	Flea beetle	Chewing guild	Whitefly	Sucking guild	Flea beetle | Whitefly	0.047	ns	positive	weak
6th crop	Physico-morphic controlled	Lady bird beetle	Predatory guild	Jassid	Sucking guild	Jassid | Lady bird beetle	-0.034	ns	negative	weak
6th crop	Physico-morphic controlled	Jassid	Sucking guild	Mealybug	Sucking guild	Jassid | Mealybug	0.16	ns	positive	weak
6th crop	Physico-morphic controlled	Spider	Predatory guild	Jassid	Sucking guild	Jassid | Spider	-0.148	ns	negative	weak
6th crop	Physico-morphic controlled	Jassid	Sucking guild	Whitefly	Sucking guild	Jassid | Whitefly	0.679	*	positive	moderate
6th crop	Physico-morphic controlled	Lady bird beetle	Predatory guild	Mealybug	Sucking guild	Lady bird beetle | Mealybug	-0.378	ns	negative	weak-to-moderate
6th crop	Physico-morphic controlled	Spider	Predatory guild	Lady bird beetle	Predatory guild	Lady bird beetle | Spider	0.129	ns	positive	weak
6th crop	Physico-morphic controlled	Lady bird beetle	Predatory guild	Whitefly	Sucking guild	Lady bird beetle | Whitefly	0.399	ns	positive	weak-to-moderate
6th crop	Physico-morphic controlled	Spider	Predatory guild	Mealybug	Sucking guild	Mealybug | Spider	-0.518	ns	negative	moderate
6th crop	Physico-morphic controlled	Whitefly	Sucking guild	Mealybug	Sucking guild	Mealybug | Whitefly	-0.469	ns	negative	weak-to-moderate
6th crop	Physico-morphic controlled	Spider	Predatory guild	Whitefly	Sucking guild	Spider | Whitefly	0.201	ns	positive	weak
7th crop	Physico-morphic controlled	Ant	Ant guild	Aphid	Sucking guild	Ant | Aphid	0.8	**	positive	strong
7th crop	Physico-morphic controlled	Ant	Ant guild	BSFB	Chewing guild	Ant | BSFB	0.246	ns	positive	weak
7th crop	Physico-morphic controlled	Ant	Ant guild	Epilachna beetle	Chewing guild	Ant | Epilachna beetle	-0.344	ns	negative	weak-to-moderate
7th crop	Physico-morphic controlled	Ant	Ant guild	Flea beetle	Chewing guild	Ant | Flea beetle	-0.001	ns	negative	weak
7th crop	Physico-morphic controlled	Ant	Ant guild	Jassid	Sucking guild	Ant | Jassid	0.085	ns	positive	weak
7th crop	Physico-morphic controlled	Ant	Ant guild	Lady bird beetle	Predatory guild	Ant | Lady bird beetle	0.327	ns	positive	weak-to-moderate
7th crop	Physico-morphic controlled	Ant	Ant guild	Mealybug	Sucking guild	Ant | Mealybug	-0.06	ns	negative	weak
7th crop	Physico-morphic controlled	Ant	Ant guild	Spider	Predatory guild	Ant | Spider	-0.277	ns	negative	weak
7th crop	Physico-morphic controlled	Ant	Ant guild	Thrips	Sucking guild	Ant | Thrips	0.533	ns	positive	moderate
7th crop	Physico-morphic controlled	Ant	Ant guild	Whitefly	Sucking guild	Ant | Whitefly	0.475	ns	positive	weak-to-moderate
7th crop	Physico-morphic controlled	Epilachna beetle	Chewing guild	Aphid	Sucking guild	Aphid | Epilachna beetle	-0.416	ns	negative	weak-to-moderate
7th crop	Physico-morphic controlled	Flea beetle	Chewing guild	Aphid	Sucking guild	Aphid | Flea beetle	-0.509	ns	negative	moderate
7th crop	Physico-morphic controlled	Aphid	Sucking guild	Jassid	Sucking guild	Aphid | Jassid	0.08	ns	positive	weak
7th crop	Physico-morphic controlled	Lady bird beetle	Predatory guild	Aphid	Sucking guild	Aphid | Lady bird beetle	0.425	ns	positive	weak-to-moderate
7th crop	Physico-morphic controlled	Aphid	Sucking guild	Mealybug	Sucking guild	Aphid | Mealybug	-0.068	ns	negative	weak
7th crop	Physico-morphic controlled	Spider	Predatory guild	Aphid	Sucking guild	Aphid | Spider	-0.677	*	negative	moderate
7th crop	Physico-morphic controlled	Thrips	Sucking guild	Aphid	Sucking guild	Aphid | Thrips	0.594	ns	positive	moderate
7th crop	Physico-morphic controlled	Aphid	Sucking guild	Whitefly	Sucking guild	Aphid | Whitefly	0.366	ns	positive	weak-to-moderate
7th crop	Physico-morphic controlled	Lady bird beetle	Predatory guild	BSFB	Chewing guild	BSFB | Lady bird beetle	0.517	ns	positive	moderate
7th crop	Physico-morphic controlled	Spider	Predatory guild	BSFB	Chewing guild	BSFB | Spider	0.297	ns	positive	weak
7th crop	Physico-morphic controlled	Flea beetle	Chewing guild	Epilachna beetle	Chewing guild	Epilachna beetle | Flea beetle	0.218	ns	positive	weak
7th crop	Physico-morphic controlled	Epilachna beetle	Chewing guild	Jassid	Sucking guild	Epilachna beetle | Jassid	-0.047	ns	negative	weak
7th crop	Physico-morphic controlled	Lady bird beetle	Predatory guild	Epilachna beetle	Chewing guild	Epilachna beetle | Lady bird beetle	0.094	ns	positive	weak
7th crop	Physico-morphic controlled	Epilachna beetle	Chewing guild	Mealybug	Sucking guild	Epilachna beetle | Mealybug	0.415	ns	positive	weak-to-moderate
7th crop	Physico-morphic controlled	Spider	Predatory guild	Epilachna beetle	Chewing guild	Epilachna beetle | Spider	0.179	ns	positive	weak
7th crop	Physico-morphic controlled	Epilachna beetle	Chewing guild	Thrips	Sucking guild	Epilachna beetle | Thrips	-0.381	ns	negative	weak-to-moderate
7th crop	Physico-morphic controlled	Epilachna beetle	Chewing guild	Whitefly	Sucking guild	Epilachna beetle | Whitefly	-0.117	ns	negative	weak
7th crop	Physico-morphic controlled	Flea beetle	Chewing guild	Jassid	Sucking guild	Flea beetle | Jassid	-0.262	ns	negative	weak
7th crop	Physico-morphic controlled	Lady bird beetle	Predatory guild	Flea beetle	Chewing guild	Flea beetle | Lady bird beetle	-0.387	ns	negative	weak-to-moderate
7th crop	Physico-morphic controlled	Flea beetle	Chewing guild	Mealybug	Sucking guild	Flea beetle | Mealybug	-0.23	ns	negative	weak
7th crop	Physico-morphic controlled	Spider	Predatory guild	Flea beetle	Chewing guild	Flea beetle | Spider	0.494	ns	positive	weak-to-moderate
7th crop	Physico-morphic controlled	Flea beetle	Chewing guild	Thrips	Sucking guild	Flea beetle | Thrips	-0.076	ns	negative	weak
7th crop	Physico-morphic controlled	Flea beetle	Chewing guild	Whitefly	Sucking guild	Flea beetle | Whitefly	0.104	ns	positive	weak
7th crop	Physico-morphic controlled	Lady bird beetle	Predatory guild	Jassid	Sucking guild	Jassid | Lady bird beetle	0.281	ns	positive	weak
7th crop	Physico-morphic controlled	Jassid	Sucking guild	Mealybug	Sucking guild	Jassid | Mealybug	0.508	ns	positive	moderate
7th crop	Physico-morphic controlled	Spider	Predatory guild	Jassid	Sucking guild	Jassid | Spider	0.122	ns	positive	weak
7th crop	Physico-morphic controlled	Thrips	Sucking guild	Jassid	Sucking guild	Jassid | Thrips	-0.061	ns	negative	weak
7th crop	Physico-morphic controlled	Jassid	Sucking guild	Whitefly	Sucking guild	Jassid | Whitefly	0.242	ns	positive	weak
7th crop	Physico-morphic controlled	Lady bird beetle	Predatory guild	Mealybug	Sucking guild	Lady bird beetle | Mealybug	0.385	ns	positive	weak-to-moderate
7th crop	Physico-morphic controlled	Spider	Predatory guild	Lady bird beetle	Predatory guild	Lady bird beetle | Spider	-0.389	ns	negative	weak-to-moderate
7th crop	Physico-morphic controlled	Lady bird beetle	Predatory guild	Thrips	Sucking guild	Lady bird beetle | Thrips	0.208	ns	positive	weak
7th crop	Physico-morphic controlled	Lady bird beetle	Predatory guild	Whitefly	Sucking guild	Lady bird beetle | Whitefly	0.175	ns	positive	weak
7th crop	Physico-morphic controlled	Spider	Predatory guild	Mealybug	Sucking guild	Mealybug | Spider	-0.086	ns	negative	weak
7th crop	Physico-morphic controlled	Thrips	Sucking guild	Mealybug	Sucking guild	Mealybug | Thrips	-0.325	ns	negative	weak-to-moderate
7th crop	Physico-morphic controlled	Whitefly	Sucking guild	Mealybug	Sucking guild	Mealybug | Whitefly	-0.474	ns	negative	weak-to-moderate
7th crop	Physico-morphic controlled	Spider	Predatory guild	Thrips	Sucking guild	Spider | Thrips	-0.601	ns	negative	moderate
7th crop	Physico-morphic controlled	Spider	Predatory guild	Whitefly	Sucking guild	Spider | Whitefly	0.025	ns	positive	weak
7th crop	Physico-morphic controlled	Thrips	Sucking guild	Whitefly	Sucking guild	Thrips | Whitefly	0.606	*	positive	moderate
8th crop	Physico-morphic controlled	Ant	Ant guild	Aphid	Sucking guild	Ant | Aphid	0.69	*	positive	moderate
8th crop	Physico-morphic controlled	Ant	Ant guild	BSFB	Chewing guild	Ant | BSFB	-0.098	ns	negative	weak
8th crop	Physico-morphic controlled	Ant	Ant guild	Epilachna beetle	Chewing guild	Ant | Epilachna beetle	0.228	ns	positive	weak
8th crop	Physico-morphic controlled	Ant	Ant guild	Flea beetle	Chewing guild	Ant | Flea beetle	0.127	ns	positive	weak
8th crop	Physico-morphic controlled	Ant	Ant guild	Jassid	Sucking guild	Ant | Jassid	-0.509	ns	negative	moderate
8th crop	Physico-morphic controlled	Ant	Ant guild	Lady bird beetle	Predatory guild	Ant | Lady bird beetle	-0.184	ns	negative	weak
8th crop	Physico-morphic controlled	Ant	Ant guild	Mealybug	Sucking guild	Ant | Mealybug	-0.352	ns	negative	weak-to-moderate
8th crop	Physico-morphic controlled	Ant	Ant guild	Spider	Predatory guild	Ant | Spider	-0.278	ns	negative	weak
8th crop	Physico-morphic controlled	Ant	Ant guild	Thrips	Sucking guild	Ant | Thrips	-0.176	ns	negative	weak
8th crop	Physico-morphic controlled	Ant	Ant guild	Whitefly	Sucking guild	Ant | Whitefly	0.535	ns	positive	moderate
8th crop	Physico-morphic controlled	Epilachna beetle	Chewing guild	Aphid	Sucking guild	Aphid | Epilachna beetle	0.562	ns	positive	moderate
8th crop	Physico-morphic controlled	Flea beetle	Chewing guild	Aphid	Sucking guild	Aphid | Flea beetle	0.597	ns	positive	moderate
8th crop	Physico-morphic controlled	Aphid	Sucking guild	Jassid	Sucking guild	Aphid | Jassid	-0.463	ns	negative	weak-to-moderate
8th crop	Physico-morphic controlled	Lady bird beetle	Predatory guild	Aphid	Sucking guild	Aphid | Lady bird beetle	0.196	ns	positive	weak
8th crop	Physico-morphic controlled	Aphid	Sucking guild	Mealybug	Sucking guild	Aphid | Mealybug	-0.61	*	negative	moderate
8th crop	Physico-morphic controlled	Spider	Predatory guild	Aphid	Sucking guild	Aphid | Spider	-0.092	ns	negative	weak
8th crop	Physico-morphic controlled	Thrips	Sucking guild	Aphid	Sucking guild	Aphid | Thrips	-0.296	ns	negative	weak
8th crop	Physico-morphic controlled	Aphid	Sucking guild	Whitefly	Sucking guild	Aphid | Whitefly	0.583	ns	positive	moderate
8th crop	Physico-morphic controlled	Lady bird beetle	Predatory guild	BSFB	Chewing guild	BSFB | Lady bird beetle	-0.765	**	negative	strong
8th crop	Physico-morphic controlled	Spider	Predatory guild	BSFB	Chewing guild	BSFB | Spider	0.013	ns	positive	weak
8th crop	Physico-morphic controlled	Flea beetle	Chewing guild	Epilachna beetle	Chewing guild	Epilachna beetle | Flea beetle	0.645	*	positive	moderate
8th crop	Physico-morphic controlled	Epilachna beetle	Chewing guild	Jassid	Sucking guild	Epilachna beetle | Jassid	-0.588	ns	negative	moderate
8th crop	Physico-morphic controlled	Lady bird beetle	Predatory guild	Epilachna beetle	Chewing guild	Epilachna beetle | Lady bird beetle	0.662	*	positive	moderate
8th crop	Physico-morphic controlled	Epilachna beetle	Chewing guild	Mealybug	Sucking guild	Epilachna beetle | Mealybug	-0.895	**	negative	strong
8th crop	Physico-morphic controlled	Spider	Predatory guild	Epilachna beetle	Chewing guild	Epilachna beetle | Spider	-0.1	ns	negative	weak
8th crop	Physico-morphic controlled	Epilachna beetle	Chewing guild	Thrips	Sucking guild	Epilachna beetle | Thrips	-0.84	**	negative	strong
8th crop	Physico-morphic controlled	Epilachna beetle	Chewing guild	Whitefly	Sucking guild	Epilachna beetle | Whitefly	-0.091	ns	negative	weak
8th crop	Physico-morphic controlled	Flea beetle	Chewing guild	Jassid	Sucking guild	Flea beetle | Jassid	-0.454	ns	negative	weak-to-moderate
8th crop	Physico-morphic controlled	Lady bird beetle	Predatory guild	Flea beetle	Chewing guild	Flea beetle | Lady bird beetle	0.093	ns	positive	weak
8th crop	Physico-morphic controlled	Flea beetle	Chewing guild	Mealybug	Sucking guild	Flea beetle | Mealybug	-0.548	ns	negative	moderate
8th crop	Physico-morphic controlled	Spider	Predatory guild	Flea beetle	Chewing guild	Flea beetle | Spider	-0.101	ns	negative	weak
8th crop	Physico-morphic controlled	Flea beetle	Chewing guild	Thrips	Sucking guild	Flea beetle | Thrips	-0.456	ns	negative	weak-to-moderate
8th crop	Physico-morphic controlled	Flea beetle	Chewing guild	Whitefly	Sucking guild	Flea beetle | Whitefly	-0.107	ns	negative	weak
8th crop	Physico-morphic controlled	Lady bird beetle	Predatory guild	Jassid	Sucking guild	Jassid | Lady bird beetle	0.039	ns	positive	weak
8th crop	Physico-morphic controlled	Jassid	Sucking guild	Mealybug	Sucking guild	Jassid | Mealybug	0.7	*	positive	strong
8th crop	Physico-morphic controlled	Spider	Predatory guild	Jassid	Sucking guild	Jassid | Spider	0.342	ns	positive	weak-to-moderate
8th crop	Physico-morphic controlled	Thrips	Sucking guild	Jassid	Sucking guild	Jassid | Thrips	0.4	ns	positive	weak-to-moderate
8th crop	Physico-morphic controlled	Jassid	Sucking guild	Whitefly	Sucking guild	Jassid | Whitefly	0.062	ns	positive	weak
8th crop	Physico-morphic controlled	Lady bird beetle	Predatory guild	Mealybug	Sucking guild	Lady bird beetle | Mealybug	-0.456	ns	negative	weak-to-moderate
8th crop	Physico-morphic controlled	Spider	Predatory guild	Lady bird beetle	Predatory guild	Lady bird beetle | Spider	0.309	ns	positive	weak-to-moderate
8th crop	Physico-morphic controlled	Lady bird beetle	Predatory guild	Thrips	Sucking guild	Lady bird beetle | Thrips	-0.597	ns	negative	moderate
8th crop	Physico-morphic controlled	Lady bird beetle	Predatory guild	Whitefly	Sucking guild	Lady bird beetle | Whitefly	-0.063	ns	negative	weak
8th crop	Physico-morphic controlled	Spider	Predatory guild	Mealybug	Sucking guild	Mealybug | Spider	0.395	ns	positive	weak-to-moderate
8th crop	Physico-morphic controlled	Thrips	Sucking guild	Mealybug	Sucking guild	Mealybug | Thrips	0.691	*	positive	moderate
8th crop	Physico-morphic controlled	Whitefly	Sucking guild	Mealybug	Sucking guild	Mealybug | Whitefly	-0.101	ns	negative	weak
8th crop	Physico-morphic controlled	Spider	Predatory guild	Thrips	Sucking guild	Spider | Thrips	0.294	ns	positive	weak
8th crop	Physico-morphic controlled	Spider	Predatory guild	Whitefly	Sucking guild	Spider | Whitefly	-0.17	ns	negative	weak
8th crop	Physico-morphic controlled	Thrips	Sucking guild	Whitefly	Sucking guild	Thrips | Whitefly	0.288	ns	positive	weak
9th crop	Physico-morphic controlled	Ant	Ant guild	Aphid	Sucking guild	Ant | Aphid	0.733	*	positive	strong
9th crop	Physico-morphic controlled	Ant	Ant guild	BSFB	Chewing guild	Ant | BSFB	-0.263	ns	negative	weak
9th crop	Physico-morphic controlled	Ant	Ant guild	Epilachna beetle	Chewing guild	Ant | Epilachna beetle	0.358	ns	positive	weak-to-moderate
9th crop	Physico-morphic controlled	Ant	Ant guild	Flea beetle	Chewing guild	Ant | Flea beetle	0.353	ns	positive	weak-to-moderate
9th crop	Physico-morphic controlled	Ant	Ant guild	Jassid	Sucking guild	Ant | Jassid	-0.116	ns	negative	weak
9th crop	Physico-morphic controlled	Ant	Ant guild	Lady bird beetle	Predatory guild	Ant | Lady bird beetle	0.833	**	positive	strong
9th crop	Physico-morphic controlled	Ant	Ant guild	Leaf roller	Chewing guild	Ant | Leaf roller	0.703	*	positive	strong
9th crop	Physico-morphic controlled	Ant	Ant guild	Spider	Predatory guild	Ant | Spider	0.679	*	positive	moderate
9th crop	Physico-morphic controlled	Ant	Ant guild	Thrips	Sucking guild	Ant | Thrips	-0.374	ns	negative	weak-to-moderate
9th crop	Physico-morphic controlled	Ant	Ant guild	Whitefly	Sucking guild	Ant | Whitefly	0.774	**	positive	strong
9th crop	Physico-morphic controlled	Epilachna beetle	Chewing guild	Aphid	Sucking guild	Aphid | Epilachna beetle	0.111	ns	positive	weak
9th crop	Physico-morphic controlled	Flea beetle	Chewing guild	Aphid	Sucking guild	Aphid | Flea beetle	0.546	ns	positive	moderate
9th crop	Physico-morphic controlled	Aphid	Sucking guild	Jassid	Sucking guild	Aphid | Jassid	0.05	ns	positive	weak
9th crop	Physico-morphic controlled	Lady bird beetle	Predatory guild	Aphid	Sucking guild	Aphid | Lady bird beetle	0.655	*	positive	moderate
9th crop	Physico-morphic controlled	Leaf roller	Chewing guild	Aphid	Sucking guild	Aphid | Leaf roller	0.487	ns	positive	weak-to-moderate
9th crop	Physico-morphic controlled	Spider	Predatory guild	Aphid	Sucking guild	Aphid | Spider	0.473	ns	positive	weak-to-moderate
9th crop	Physico-morphic controlled	Thrips	Sucking guild	Aphid	Sucking guild	Aphid | Thrips	0.164	ns	positive	weak
9th crop	Physico-morphic controlled	Aphid	Sucking guild	Whitefly	Sucking guild	Aphid | Whitefly	0.549	ns	positive	moderate
9th crop	Physico-morphic controlled	Lady bird beetle	Predatory guild	BSFB	Chewing guild	BSFB | Lady bird beetle	-0.105	ns	negative	weak
9th crop	Physico-morphic controlled	Leaf roller	Chewing guild	BSFB	Chewing guild	BSFB | Leaf roller	-0.097	ns	negative	weak
9th crop	Physico-morphic controlled	Spider	Predatory guild	BSFB	Chewing guild	BSFB | Spider	-0.549	ns	negative	moderate
9th crop	Physico-morphic controlled	Flea beetle	Chewing guild	Epilachna beetle	Chewing guild	Epilachna beetle | Flea beetle	0.515	ns	positive	moderate
9th crop	Physico-morphic controlled	Epilachna beetle	Chewing guild	Jassid	Sucking guild	Epilachna beetle | Jassid	-0.416	ns	negative	weak-to-moderate
9th crop	Physico-morphic controlled	Lady bird beetle	Predatory guild	Epilachna beetle	Chewing guild	Epilachna beetle | Lady bird beetle	0.33	ns	positive	weak-to-moderate
9th crop	Physico-morphic controlled	Leaf roller	Chewing guild	Epilachna beetle	Chewing guild	Epilachna beetle | Leaf roller	-0.026	ns	negative	weak
9th crop	Physico-morphic controlled	Spider	Predatory guild	Epilachna beetle	Chewing guild	Epilachna beetle | Spider	0.388	ns	positive	weak-to-moderate
9th crop	Physico-morphic controlled	Epilachna beetle	Chewing guild	Thrips	Sucking guild	Epilachna beetle | Thrips	-0.305	ns	negative	weak-to-moderate
9th crop	Physico-morphic controlled	Epilachna beetle	Chewing guild	Whitefly	Sucking guild	Epilachna beetle | Whitefly	0.185	ns	positive	weak
9th crop	Physico-morphic controlled	Flea beetle	Chewing guild	Jassid	Sucking guild	Flea beetle | Jassid	0.126	ns	positive	weak
9th crop	Physico-morphic controlled	Lady bird beetle	Predatory guild	Flea beetle	Chewing guild	Flea beetle | Lady bird beetle	0.41	ns	positive	weak-to-moderate
9th crop	Physico-morphic controlled	Leaf roller	Chewing guild	Flea beetle	Chewing guild	Flea beetle | Leaf roller	0.109	ns	positive	weak
9th crop	Physico-morphic controlled	Spider	Predatory guild	Flea beetle	Chewing guild	Flea beetle | Spider	0.145	ns	positive	weak
9th crop	Physico-morphic controlled	Flea beetle	Chewing guild	Thrips	Sucking guild	Flea beetle | Thrips	0.113	ns	positive	weak
9th crop	Physico-morphic controlled	Flea beetle	Chewing guild	Whitefly	Sucking guild	Flea beetle | Whitefly	0.35	ns	positive	weak-to-moderate
9th crop	Physico-morphic controlled	Lady bird beetle	Predatory guild	Jassid	Sucking guild	Jassid | Lady bird beetle	0.062	ns	positive	weak
9th crop	Physico-morphic controlled	Leaf roller	Chewing guild	Jassid	Sucking guild	Jassid | Leaf roller	0.304	ns	positive	weak-to-moderate
9th crop	Physico-morphic controlled	Spider	Predatory guild	Jassid	Sucking guild	Jassid | Spider	-0.628	*	negative	moderate
9th crop	Physico-morphic controlled	Thrips	Sucking guild	Jassid	Sucking guild	Jassid | Thrips	0.653	*	positive	moderate
9th crop	Physico-morphic controlled	Jassid	Sucking guild	Whitefly	Sucking guild	Jassid | Whitefly	-0.15	ns	negative	weak
9th crop	Physico-morphic controlled	Lady bird beetle	Predatory guild	Leaf roller	Chewing guild	Lady bird beetle | Leaf roller	0.773	**	positive	strong
9th crop	Physico-morphic controlled	Spider	Predatory guild	Lady bird beetle	Predatory guild	Lady bird beetle | Spider	0.554	ns	positive	moderate
9th crop	Physico-morphic controlled	Lady bird beetle	Predatory guild	Thrips	Sucking guild	Lady bird beetle | Thrips	-0.15	ns	negative	weak
9th crop	Physico-morphic controlled	Lady bird beetle	Predatory guild	Whitefly	Sucking guild	Lady bird beetle | Whitefly	0.772	**	positive	strong
9th crop	Physico-morphic controlled	Spider	Predatory guild	Leaf roller	Chewing guild	Leaf roller | Spider	0.305	ns	positive	weak-to-moderate
9th crop	Physico-morphic controlled	Leaf roller	Chewing guild	Thrips	Sucking guild	Leaf roller | Thrips	-0.19	ns	negative	weak
9th crop	Physico-morphic controlled	Leaf roller	Chewing guild	Whitefly	Sucking guild	Leaf roller | Whitefly	0.641	*	positive	moderate
9th crop	Physico-morphic controlled	Spider	Predatory guild	Thrips	Sucking guild	Spider | Thrips	-0.536	ns	negative	moderate
9th crop	Physico-morphic controlled	Spider	Predatory guild	Whitefly	Sucking guild	Spider | Whitefly	0.741	**	positive	strong
9th crop	Physico-morphic controlled	Thrips	Sucking guild	Whitefly	Sucking guild	Thrips | Whitefly	-0.409	ns	negative	weak-to-moderate
10th crop	Physico-morphic controlled	Ant	Ant guild	Aphid	Sucking guild	Ant | Aphid	0.737	**	positive	strong
10th crop	Physico-morphic controlled	Ant	Ant guild	BSFB	Chewing guild	Ant | BSFB	-0.552	ns	negative	moderate
10th crop	Physico-morphic controlled	Ant	Ant guild	Epilachna beetle	Chewing guild	Ant | Epilachna beetle	-0.311	ns	negative	weak-to-moderate
10th crop	Physico-morphic controlled	Ant	Ant guild	Flea beetle	Chewing guild	Ant | Flea beetle	0.177	ns	positive	weak
10th crop	Physico-morphic controlled	Ant	Ant guild	Jassid	Sucking guild	Ant | Jassid	-0.199	ns	negative	weak
10th crop	Physico-morphic controlled	Ant	Ant guild	Lady bird beetle	Predatory guild	Ant | Lady bird beetle	-0.516	ns	negative	moderate
10th crop	Physico-morphic controlled	Ant	Ant guild	Spider	Predatory guild	Ant | Spider	-0.41	ns	negative	weak-to-moderate
10th crop	Physico-morphic controlled	Ant	Ant guild	Thrips	Sucking guild	Ant | Thrips	-0.077	ns	negative	weak
10th crop	Physico-morphic controlled	Ant	Ant guild	Whitefly	Sucking guild	Ant | Whitefly	0.273	ns	positive	weak
10th crop	Physico-morphic controlled	Epilachna beetle	Chewing guild	Aphid	Sucking guild	Aphid | Epilachna beetle	-0.12	ns	negative	weak
10th crop	Physico-morphic controlled	Flea beetle	Chewing guild	Aphid	Sucking guild	Aphid | Flea beetle	0.068	ns	positive	weak
10th crop	Physico-morphic controlled	Aphid	Sucking guild	Jassid	Sucking guild	Aphid | Jassid	-0.136	ns	negative	weak
10th crop	Physico-morphic controlled	Lady bird beetle	Predatory guild	Aphid	Sucking guild	Aphid | Lady bird beetle	-0.822	**	negative	strong
10th crop	Physico-morphic controlled	Spider	Predatory guild	Aphid	Sucking guild	Aphid | Spider	-0.225	ns	negative	weak
10th crop	Physico-morphic controlled	Thrips	Sucking guild	Aphid	Sucking guild	Aphid | Thrips	-0.076	ns	negative	weak
10th crop	Physico-morphic controlled	Aphid	Sucking guild	Whitefly	Sucking guild	Aphid | Whitefly	0.357	ns	positive	weak-to-moderate
10th crop	Physico-morphic controlled	Lady bird beetle	Predatory guild	BSFB	Chewing guild	BSFB | Lady bird beetle	0.802	**	positive	strong
10th crop	Physico-morphic controlled	Spider	Predatory guild	BSFB	Chewing guild	BSFB | Spider	0.403	ns	positive	weak-to-moderate
10th crop	Physico-morphic controlled	Flea beetle	Chewing guild	Epilachna beetle	Chewing guild	Epilachna beetle | Flea beetle	0.543	ns	positive	moderate
10th crop	Physico-morphic controlled	Epilachna beetle	Chewing guild	Jassid	Sucking guild	Epilachna beetle | Jassid	0.425	ns	positive	weak-to-moderate
10th crop	Physico-morphic controlled	Lady bird beetle	Predatory guild	Epilachna beetle	Chewing guild	Epilachna beetle | Lady bird beetle	0.487	ns	positive	weak-to-moderate
10th crop	Physico-morphic controlled	Spider	Predatory guild	Epilachna beetle	Chewing guild	Epilachna beetle | Spider	0.048	ns	positive	weak
10th crop	Physico-morphic controlled	Epilachna beetle	Chewing guild	Thrips	Sucking guild	Epilachna beetle | Thrips	-0.152	ns	negative	weak
10th crop	Physico-morphic controlled	Epilachna beetle	Chewing guild	Whitefly	Sucking guild	Epilachna beetle | Whitefly	-0.146	ns	negative	weak
10th crop	Physico-morphic controlled	Flea beetle	Chewing guild	Jassid	Sucking guild	Flea beetle | Jassid	0.19	ns	positive	weak
10th crop	Physico-morphic controlled	Lady bird beetle	Predatory guild	Flea beetle	Chewing guild	Flea beetle | Lady bird beetle	0.169	ns	positive	weak
10th crop	Physico-morphic controlled	Spider	Predatory guild	Flea beetle	Chewing guild	Flea beetle | Spider	0.211	ns	positive	weak
10th crop	Physico-morphic controlled	Flea beetle	Chewing guild	Thrips	Sucking guild	Flea beetle | Thrips	-0.284	ns	negative	weak
10th crop	Physico-morphic controlled	Flea beetle	Chewing guild	Whitefly	Sucking guild	Flea beetle | Whitefly	-0.183	ns	negative	weak
10th crop	Physico-morphic controlled	Lady bird beetle	Predatory guild	Jassid	Sucking guild	Jassid | Lady bird beetle	0.351	ns	positive	weak-to-moderate
10th crop	Physico-morphic controlled	Spider	Predatory guild	Jassid	Sucking guild	Jassid | Spider	0.398	ns	positive	weak-to-moderate
10th crop	Physico-morphic controlled	Thrips	Sucking guild	Jassid	Sucking guild	Jassid | Thrips	0.768	**	positive	strong
10th crop	Physico-morphic controlled	Jassid	Sucking guild	Whitefly	Sucking guild	Jassid | Whitefly	0.629	*	positive	moderate
10th crop	Physico-morphic controlled	Spider	Predatory guild	Lady bird beetle	Predatory guild	Lady bird beetle | Spider	0.097	ns	positive	weak
10th crop	Physico-morphic controlled	Lady bird beetle	Predatory guild	Thrips	Sucking guild	Lady bird beetle | Thrips	0.115	ns	positive	weak
10th crop	Physico-morphic controlled	Lady bird beetle	Predatory guild	Whitefly	Sucking guild	Lady bird beetle | Whitefly	-0.249	ns	negative	weak
10th crop	Physico-morphic controlled	Spider	Predatory guild	Thrips	Sucking guild	Spider | Thrips	0.37	ns	positive	weak-to-moderate
10th crop	Physico-morphic controlled	Spider	Predatory guild	Whitefly	Sucking guild	Spider | Whitefly	0.198	ns	positive	weak
10th crop	Physico-morphic controlled	Thrips	Sucking guild	Whitefly	Sucking guild	Thrips | Whitefly	0.83	**	positive	strong
11th crop	Physico-morphic controlled	Ant	Ant guild	Aphid	Sucking guild	Ant | Aphid	0.046	ns	positive	weak
11th crop	Physico-morphic controlled	Ant	Ant guild	BSFB	Chewing guild	Ant | BSFB	0.495	ns	positive	weak-to-moderate
11th crop	Physico-morphic controlled	Ant	Ant guild	Epilachna beetle	Chewing guild	Ant | Epilachna beetle	0.484	ns	positive	weak-to-moderate
11th crop	Physico-morphic controlled	Ant	Ant guild	Flea beetle	Chewing guild	Ant | Flea beetle	0.104	ns	positive	weak
11th crop	Physico-morphic controlled	Ant	Ant guild	Jassid	Sucking guild	Ant | Jassid	0.265	ns	positive	weak
11th crop	Physico-morphic controlled	Ant	Ant guild	Lady bird beetle	Predatory guild	Ant | Lady bird beetle	-0.249	ns	negative	weak
11th crop	Physico-morphic controlled	Ant	Ant guild	Mealybug	Sucking guild	Ant | Mealybug	-0.339	ns	negative	weak-to-moderate
11th crop	Physico-morphic controlled	Ant	Ant guild	Spider	Predatory guild	Ant | Spider	-0.142	ns	negative	weak
11th crop	Physico-morphic controlled	Ant	Ant guild	Thrips	Sucking guild	Ant | Thrips	0.553	ns	positive	moderate
11th crop	Physico-morphic controlled	Ant	Ant guild	Whitefly	Sucking guild	Ant | Whitefly	-0.051	ns	negative	weak
11th crop	Physico-morphic controlled	Epilachna beetle	Chewing guild	Aphid	Sucking guild	Aphid | Epilachna beetle	0.105	ns	positive	weak
11th crop	Physico-morphic controlled	Flea beetle	Chewing guild	Aphid	Sucking guild	Aphid | Flea beetle	-0.541	ns	negative	moderate
11th crop	Physico-morphic controlled	Aphid	Sucking guild	Jassid	Sucking guild	Aphid | Jassid	-0.575	ns	negative	moderate
11th crop	Physico-morphic controlled	Lady bird beetle	Predatory guild	Aphid	Sucking guild	Aphid | Lady bird beetle	0.156	ns	positive	weak
11th crop	Physico-morphic controlled	Aphid	Sucking guild	Mealybug	Sucking guild	Aphid | Mealybug	0.228	ns	positive	weak
11th crop	Physico-morphic controlled	Spider	Predatory guild	Aphid	Sucking guild	Aphid | Spider	0.225	ns	positive	weak
11th crop	Physico-morphic controlled	Thrips	Sucking guild	Aphid	Sucking guild	Aphid | Thrips	-0.061	ns	negative	weak
11th crop	Physico-morphic controlled	Aphid	Sucking guild	Whitefly	Sucking guild	Aphid | Whitefly	-0.333	ns	negative	weak-to-moderate
11th crop	Physico-morphic controlled	Lady bird beetle	Predatory guild	BSFB	Chewing guild	BSFB | Lady bird beetle	-0.131	ns	negative	weak
11th crop	Physico-morphic controlled	Spider	Predatory guild	BSFB	Chewing guild	BSFB | Spider	0.058	ns	positive	weak
11th crop	Physico-morphic controlled	Flea beetle	Chewing guild	Epilachna beetle	Chewing guild	Epilachna beetle | Flea beetle	-0.18	ns	negative	weak
11th crop	Physico-morphic controlled	Epilachna beetle	Chewing guild	Jassid	Sucking guild	Epilachna beetle | Jassid	-0.275	ns	negative	weak
11th crop	Physico-morphic controlled	Lady bird beetle	Predatory guild	Epilachna beetle	Chewing guild	Epilachna beetle | Lady bird beetle	-0.164	ns	negative	weak
11th crop	Physico-morphic controlled	Epilachna beetle	Chewing guild	Mealybug	Sucking guild	Epilachna beetle | Mealybug	-0.342	ns	negative	weak-to-moderate
11th crop	Physico-morphic controlled	Spider	Predatory guild	Epilachna beetle	Chewing guild	Epilachna beetle | Spider	0.334	ns	positive	weak-to-moderate
11th crop	Physico-morphic controlled	Epilachna beetle	Chewing guild	Thrips	Sucking guild	Epilachna beetle | Thrips	0.263	ns	positive	weak
11th crop	Physico-morphic controlled	Epilachna beetle	Chewing guild	Whitefly	Sucking guild	Epilachna beetle | Whitefly	0.048	ns	positive	weak
11th crop	Physico-morphic controlled	Flea beetle	Chewing guild	Jassid	Sucking guild	Flea beetle | Jassid	0.528	ns	positive	moderate
11th crop	Physico-morphic controlled	Lady bird beetle	Predatory guild	Flea beetle	Chewing guild	Flea beetle | Lady bird beetle	0.109	ns	positive	weak
11th crop	Physico-morphic controlled	Flea beetle	Chewing guild	Mealybug	Sucking guild	Flea beetle | Mealybug	-0.48	ns	negative	weak-to-moderate
11th crop	Physico-morphic controlled	Spider	Predatory guild	Flea beetle	Chewing guild	Flea beetle | Spider	-0.3	ns	negative	weak-to-moderate
11th crop	Physico-morphic controlled	Flea beetle	Chewing guild	Thrips	Sucking guild	Flea beetle | Thrips	0.562	ns	positive	moderate
11th crop	Physico-morphic controlled	Flea beetle	Chewing guild	Whitefly	Sucking guild	Flea beetle | Whitefly	0.615	*	positive	moderate
11th crop	Physico-morphic controlled	Lady bird beetle	Predatory guild	Jassid	Sucking guild	Jassid | Lady bird beetle	0.131	ns	positive	weak
11th crop	Physico-morphic controlled	Jassid	Sucking guild	Mealybug	Sucking guild	Jassid | Mealybug	0.086	ns	positive	weak
11th crop	Physico-morphic controlled	Spider	Predatory guild	Jassid	Sucking guild	Jassid | Spider	-0.734	*	negative	strong
11th crop	Physico-morphic controlled	Thrips	Sucking guild	Jassid	Sucking guild	Jassid | Thrips	0.359	ns	positive	weak-to-moderate
11th crop	Physico-morphic controlled	Jassid	Sucking guild	Whitefly	Sucking guild	Jassid | Whitefly	0.624	*	positive	moderate
11th crop	Physico-morphic controlled	Lady bird beetle	Predatory guild	Mealybug	Sucking guild	Lady bird beetle | Mealybug	0.363	ns	positive	weak-to-moderate
11th crop	Physico-morphic controlled	Spider	Predatory guild	Lady bird beetle	Predatory guild	Lady bird beetle | Spider	-0.542	ns	negative	moderate
11th crop	Physico-morphic controlled	Lady bird beetle	Predatory guild	Thrips	Sucking guild	Lady bird beetle | Thrips	0.313	ns	positive	weak-to-moderate
11th crop	Physico-morphic controlled	Lady bird beetle	Predatory guild	Whitefly	Sucking guild	Lady bird beetle | Whitefly	0.499	ns	positive	weak-to-moderate
11th crop	Physico-morphic controlled	Spider	Predatory guild	Mealybug	Sucking guild	Mealybug | Spider	-0.507	ns	negative	moderate
11th crop	Physico-morphic controlled	Thrips	Sucking guild	Mealybug	Sucking guild	Mealybug | Thrips	-0.17	ns	negative	weak
11th crop	Physico-morphic controlled	Whitefly	Sucking guild	Mealybug	Sucking guild	Mealybug | Whitefly	-0.077	ns	negative	weak
11th crop	Physico-morphic controlled	Spider	Predatory guild	Thrips	Sucking guild	Spider | Thrips	-0.563	ns	negative	moderate
11th crop	Physico-morphic controlled	Spider	Predatory guild	Whitefly	Sucking guild	Spider | Whitefly	-0.518	ns	negative	moderate
11th crop	Physico-morphic controlled	Thrips	Sucking guild	Whitefly	Sucking guild	Thrips | Whitefly	0.523	ns	positive	moderate
